# Supplementary material for: Biogeography and Diversification of Bumblebees (Hymenoptera: Apidae), with Emphasis on Neotropical Species
Source: MDPI journal article supplement (doi:10.3390/d14040238), 2022-03-25
Supplement: s1 [file s1]

**Table S2.** List of primers used to amplify mitochondrial and nuclear genes.

| Gene  | Primer    | Primer sequence                  | Reference     |
|-------|-----------|----------------------------------|---------------|
| COI   | LepF1     | 5'-ATTCAACCAATCATAAAGATATTGG-3'  | [1]           |
| COI   | LepR1     | 5'-TAAACTTCTGGATGTCCAAAAAATCA-3' | [1]           |
| COI   | mtd_6     | 5'-GGAGGATTTGGAAATTGATTAGTTCC-3' | [2]           |
| COI   | mtd_9     | 5'-CCCGGTAAAATTAATAAATAAACTTC-3' | [2]           |
| COI   | COI_R_PR3 | 5'-GCTCGTGTGTCAACATCTAA-3'       | designed here |
| CytB  | MBI_30    | 5'-TCGAGTTCCATTTGATTT-3'         | [3]           |
| CytB  | mtd_26    | 5'-TATGTACTACCATGAGGACAAATATC-3' | [2]           |
| 16S   | LR13943F  | 5'-CACCTGTTTATCAAAAACAT-3'       | [4]           |
| 16S   | 874       | 5'-ATAGATAGAAACCAATCTG-3'        | [5]           |
| Opsin | LWRhF     | 5'-AATTGCTATTAYGARACNTGGGT-3'    | [6]           |
| Opsin | LWRhR     | 5'-ATATGGAGTCCANGCCATRAACCA-3'   | [6]           |
| EF1α  | EF1αF     | 5'-GGACACAGAGATTTTCATCAARAA-3'   | [7]           |
| EF1α  | EF1αR     | 5'-TTGCAAAGCTTCRTGRTGCATTT-3'    | [7]           |
| Argk  | ArgkF1    | 5'-GTTGACCAAGCYGTYTTGGA-3'       | [7]           |
| Argk  | ArgkR1    | 5'-CATGGAAATAATACGRAGRTG-3'      | [7]           |
| PEPCK | FHv4      | 5'-TGTATRATAATTCGCAAYTTCAC-3''   | [8]           |
| PEPCK | RHv4      | 5'-CTGCTGGRGTYCTAGATCC-3'        | [8]           |

## References

1. Hebert, P.D.; Penton, E.H.; Burns, J.M.; Janzen, D.H.; Hallwachs, W. Ten Species in One: DNA Barcoding Reveals Cryptic Species in the Neotropical Skipper Butterfly *Astraptes Fulgerator*. *Proc. Natl. Acad. Sci. U. S. A.* **2004**, *101*, 14812–14817.
2. Simon C; Frati F; Beckenbach A; Crespi B; Liu H; Flook P Evolution, Weighting, and Phylogenetic Utility of Mitochondrial Gene Sequences and a Compilation of Conserved Polymerase Chain Reaction Primers. *Entomol Soc Amer* 87: 651–701. 1994.
3. Silvestre, D.; Dowton, M.; Arias, M.C. The Mitochondrial Genome of the Stingless Bee *Melipona Bicolor* (Hymenoptera, Apidae, Meliponini): Sequence, Gene Organization and a Unique TRNA Translocation Event Conserved across the Tribe Meliponini. *Genet. Mol. Biol.* **2008**, *31*, 451–460.
4. Costa, M.; Del Lama, M.A.; Melo, G.; Sheppard, W. Molecular Phylogeny of the Stingless Bees (Apidae, Apinae, Meliponini) Inferred from Mitochondrial 16S rDNA Sequences. *Apidologie* **2003**, *34*, 73–84.
5. Cameron, S.A.; Derr, A.D.; Austin, J.N.; Wharton, R.A. The Application of Nucleotide Sequence Data to Phylogeny of the Hymenoptera: A Review. *J. Hymenopteran Res.* **1992**, *1*, 63–79.
6. Mardulyn, P.; Cameron, S.A. The Major Opsin in Bees (Insecta: Hymenoptera): A Promising Nuclear Gene for Higher Level Phylogenetics. *Mol. Phylogenet. Evol.* **1999**, *12*, 168–176.
7. Kawakita, A.; Sota, T.; Ascher, J.S.; Ito, M.; Tanaka, H.; Kato, M. Evolution and Phylogenetic Utility of Alignment Gaps Within Intron Sequences of Three Nuclear Genes in Bumble Bees (*Bombus*). *Mol. Biol. Evol.* **2003**, *20*, 87–92, doi:10.1093/molbev/msg007.
8. Cameron, S.A.; Hines, H.M.; Williams, P.H. A Comprehensive Phylogeny of the Bumble Bees (*Bombus*). *Biol. J. Linn. Soc.* **2007**, *91*, 161–188.
