# Supplementary material for: Biogeography and Diversification of Bumblebees (Hymenoptera: Apidae), with Emphasis on Neotropical Species
Source: MDPI journal article supplement (doi:10.3390/d14040238), 2022-03-25
Supplement: s1 [file s1]

**Table S6.** Best partitioning schemes and substitution models.

| Subset | Best Model | Subset Partitions                              | Subset Sites                         |
|--------|------------|------------------------------------------------|--------------------------------------|
| 1      | GTR+I+G    | 12S and 16S                                    | 1-389, 390-830                       |
| 2      | GTR+I+G    | Argk exon1                                     | 831-1429\3                           |
| 3      | GTR+I+G    | Argk exon2, EF1 $\alpha$ exon2 and Opsin exon2 | 832-1429\3, 3811-4628\3, 4715-5247\3 |
| 4      | SYM+G      | Argk exon3, Opsin exon3 and PEPCK exon3        | 833-1429\3, 4716-5247\3, 5351-5748\3 |
| 5      | GTR+G      | Argk intron and PEPCK intron                   | 1430-1677, 5749-6188                 |
| 6      | GTR+I+G    | COI1 and Cytb1                                 | 1678-3221\3, 3222-3809\3             |
| 7      | GTR+I+G    | COI2                                           | 1679-3221\3                          |
| 8      | GTR+I+G    | COI3                                           | 1680-3221\3                          |
| 9      | GTR+I+G    | Cytb2                                          | 3223-3809\3                          |
| 10     | GTR+I+G    | Cytb3                                          | 3224-3809\3                          |
| 11     | GTR+I      | EF1 $\alpha$ exon1                             | 3810-4628\3                          |
| 12     | GTR+G      | EF1 $\alpha$ exon3                             | 3812-4628\3                          |
| 13     | HKY+I+G    | EF1 $\alpha$ intron                            | 4629-4713                            |
| 14     | HKY+I+G    | Opsin exon1 and PEPCK exon1                    | 4714-5247\3, 5349-5748\3             |
| 15     | GTR+G      | Opsin intron                                   | 5248-5348                            |
| 16     | SYM+I+G    | PEPCK exon2                                    | 5350-5748\3                          |
