# Supplementary material for: Biogeography and Diversification of Bumblebees (Hymenoptera: Apidae), with Emphasis on Neotropical Species
Source: MDPI journal article supplement (doi:10.3390/d14040238), 2022-03-25
Supplement: s1 [file s1]

**Table S4.** Table with distribution for each bumblebee species. The column distribution contains the data set used in BioGeoBEARS (BioGeography with Bayesian – and likelihood – Evolutionary Analysis in R Scripts). The biogeographic regions in the columns BioGeoBEARS and Distribution followed Williams [1,2], <http://www.nhm.ac.uk/research-curation/research/projects/bombus/> and <http://www.nhm.ac.uk/research-curation/research/projects/bombus/regions.html> and this dataset modified, respectively. BioGeoBEARS 1: A – Oriental region; B – Japanese region; C – Palae-arctic region; D – W Nearctic region; E – E Nearctic region; F – S Nearctic region; G – N Neotropical region; H – W Neotropical region; I – E Neotropical region; J – S Neotropical region; K – Arctic region. BioGeoBEARS 2: A – Northern and western regions of the Andes; B – Amazonian; C – Chaco; D – Parana; E – Andean region; F – Palae-arctic Region; G – Nearctic Region; H – Oriental Region.

| Species                | BioGeoBEARS 1 | Distribution 1                             | BioGeoBEARS 2 | Distribution 2                 | Collection locality     | Voucher     |
|------------------------|---------------|--------------------------------------------|---------------|--------------------------------|-------------------------|-------------|
| <i>B. affinis</i>      | E             | E Nearctic region                          | G             | Nearctic region                | Illinois, USA           | Voucher 167 |
| <i>B. alpinus</i>      | C             | Palae-arctic region                        | F             | Palae-arctic region            | Gurgltal, Austria       | Voucher 29  |
| <i>B. anachoreta</i>   | A,C           | Palae-arctic, Oriental regions             | F,H           | Palae-arctic, Oriental regions |                         | AN00001     |
| <i>B. appositus</i>    | D             | W Nearctic region                          | G             | Nearctic region                | Utah, USA               | Voucher 145 |
| <i>B. ardens</i>       | A,B,C         | Oriental, Japanese, Palae-arctic regions   | F,H           | Oriental, Palae-arctic regions | Dae-Dong, S. Korea      | Voucher 131 |
| <i>B. argillaceus</i>  | C             | Palae-arctic region                        | F             | Palae-arctic region            | Kayseri Prov., Turkey   | Voucher 58  |
| <i>B. armeniacus</i>   | C             | Palae-arctic region, Oriental border       | F,H           | Oriental, Palae-arctic regions | Kayseri Prov., Turkey   | Voucher 80  |
| <i>B. asiaticus</i>    | A,C           | Oriental, Palae-arctic regions             | F,H           | Oriental, Palae-arctic regions | Himachal Pradesh, Indi  | Voucher 249 |
| <i>B. atripes</i>      | A             | Oriental region                            | H             | Oriental region                | Zhejiang Prov., China   | Voucher 66  |
| <i>B. auricomus</i>    | E             | E Nearctic region, W Nearctic border       | G             | Nearctic region                | Illinois, USA           | Voucher 62  |
| <i>B. avinoviellus</i> | A             | Oriental region                            | H             | Oriental region                | Himachal Pradesh, India | Voucher 242 |
| <i>B. baeri</i>        | H             | W Neotropical region, E Neotropical border | A,B,C         | Neotropical region             | Puno, Peru              | Voucher 174 |
| <i>B. bahiensis</i>    | I             | E Neotropical region                       | D             | Neotropical region             | Ilhéus, Bahia, Brazil   | 52893       |
| <i>B. balteatus</i>    | C,K           | Arctic, Palae-arctic regions               | F             | Palae-arctic region            | Lappland Co., Sweden    | Voucher 39  |
| <i>B. barbutellus</i>  | C             | Palae-arctic region                        | F             | Palae-arctic region            | Uppland Co., Sweden     | Voucher 73  |
| <i>B. beaticola</i>    | B             | Japanese region                            | H             | Oriental region                |                         | J5          |
| <i>B. bellicosus</i>   | I             | E Neotropical region, S Neotropical border | C,D           | Neotropical region             | Buenos Aires, Argentina | Voucher 221 |
| <i>B. bicoloratus</i>  | A             | Oriental region                            | H             | Oriental region                | Nantou, Taiwan          | Voucher 225 |
| <i>B. bifarius</i>     | D             | W Nearctic region                          | G             | Nearctic region                | New Mexico, USA         | Voucher 208 |
| <i>B. bimaculatus</i>  | E             | E Nearctic region                          | G             | Nearctic region                | Arkansas, USA           | Voucher 218 |

| Species                  | BioGeoBEARS 1 | Distribution 1                                                                                         | BioGeoBEARS 2 | Distribution 2                                                 | Collection locality           | Voucher     |
|--------------------------|---------------|--------------------------------------------------------------------------------------------------------|---------------|----------------------------------------------------------------|-------------------------------|-------------|
| <i>B. biroi</i>          | A,C           | Palaeartic, Oriental regions<br>Palaeartic, Japanese, Oriental, W Nearctic, E Nearctic regions, Arctic | F,H           | Palaeartic, Oriental regions<br>Palaeartic, Oriental, Nearctic | Ketmen Mts., Kazakhstan       | Voucher 210 |
| <i>B. bohemicus</i>      | A,B,C,D,E     | border                                                                                                 | F,G,H         | regions                                                        | E. Pyrenees, France           | Voucher 55  |
| <i>B. borealis</i>       | D,E           | W Nearctic, E Nearctic regions                                                                         | G             | Nearctic region                                                | Maine, USA                    | Voucher 250 |
| <i>B. brachycephalus</i> | F,G           | S Nearctic, N Neotropical regions                                                                      | A,G           | Nearctic, Neotropical regions                                  | Guerrero, Mexico              | Voucher 230 |
| <i>B. brasiliensis</i>   | I             | E Neotropical region                                                                                   | C,D           | Neotropical region                                             | Pedregulho, São Paulo, Brazil | 1218400     |
| <i>B. breviceps</i>      | A             | Oriental region                                                                                        | H             | Oriental region                                                | Chiang Mai, Thailand          | Voucher 190 |
| <i>B. breviovillus</i>   | I             | E Neotropical region                                                                                   | B,C,D         | Neotropical region                                             | Prata, Paraíba, Brazil        | 1200916     |
| <i>B. brodmannicus</i>   | C             | Palaeartic region                                                                                      | F             | Palaeartic region                                              | Artvin Prov., Turkey          | Voucher 77  |
| <i>B. caliginosus</i>    | D             | W Nearctic region                                                                                      | G             | Nearctic region                                                | California, USA               | Voucher 150 |
| <i>B. campestris</i>     | C             | Palaeartic region                                                                                      | F             | Palaeartic region                                              | Dalarna Co., Sweden           | Voucher 40  |
| <i>B. caucasicus</i>     | C             | Palaeartic region                                                                                      | F             | Palaeartic region                                              |                               | L084TR      |
| <i>B. centralis</i>      | D             | W Nearctic region                                                                                      | G             | Nearctic region                                                | Washington, USA               | Voucher 146 |
| <i>B. cingulatus</i>     | C             | Palaeartic region, Arctic border                                                                       | F             | Palaeartic region                                              | Lappi, Finland                | Voucher 212 |
| <i>B. citrinus</i>       | E             | E Nearctic region                                                                                      | G             | Nearctic region                                                | Virginia, USA                 | Voucher 170 |
| <i>B. coccineus</i>      | H             | W Neotropical region                                                                                   | A             | Neotropical region                                             | Huarochoiri, Peru             | Voucher 137 |
| <i>B. confusus</i>       | C             | Palaeartic region                                                                                      | F             | Palaeartic region                                              | Dorres, France                | Voucher 83  |
| <i>B. consobrinus</i>    | A,B,C         | Oriental, Japanese, Palaeartic regions, Arctic border                                                  | F,H           | Oriental, Palaeartic regions                                   | Altai Mts, Kazakhstan         | Voucher 261 |
| <i>B. convexus</i>       | A             | Oriental region                                                                                        | H             | Oriental region                                                | Qionglai Sh, Sichuan, China   | Voucher 109 |
| <i>B. coreanus</i>       | A             | Oriental region, Palaeartic border                                                                     | F,H           | Oriental, Palaeartic regions                                   |                               | J4          |
| <i>B. cornutus</i>       | A             | Oriental region                                                                                        | H             | Oriental region                                                | Ningnan, Sichuan, China       | Voucher 271 |
| <i>B. crotchii</i>       | D             | W Nearctic region                                                                                      | G             | Nearctic region                                                | California, USA               | Voucher 71  |
| <i>B. moderatus</i>      | A,C           | Palaeartic, Oriental, Arctic, W Nearctic regions                                                       | H             | Nearctic regions                                               | Alberta, Canada               | Voucher 163 |
| <i>B. cullumanus</i>     | C             | Palaeartic region                                                                                      | F             | Palaeartic region                                              | Erzurum Prov., Turkey         | Voucher 84  |
| <i>B. czerskii</i>       | A,C           | Palaeartic, Oriental regions                                                                           | F,H           | Oriental, Palaeartic regions                                   |                               | CZ00024     |
| <i>B. dahlbomii</i>      | J             | S Neotropical region, E Neotropical border                                                             | C,E           | Neotropical region                                             | Arauco Prov., Chile           | Voucher 16  |
| <i>B. defector</i>       | C             | Palaeartic region                                                                                      | F             | Palaeartic region                                              |                               | J3          |

| Species                 | BioGeoBEARS 1 | Distribution 1                                           | BioGeoBEARS 2 | Distribution 2                | Collection locality         | Voucher     |
|-------------------------|---------------|----------------------------------------------------------|---------------|-------------------------------|-----------------------------|-------------|
| <i>B. deuteronymus</i>  | A,B,C         | Palaeartic, Japanese, Oriental regions                   | F,H           | Palaeartic, Oriental regions  | Primorskiy Krai, Russia     | Voucher 147 |
| <i>B. difficillimus</i> | A,C           | Oriental, Palaeartic regions                             | F,H           | Oriental, Palaeartic regions  | Hongyuan, Sichuan, China    | Voucher 154 |
| <i>B. digressus</i>     | F,G           | S Nearctic, N Neotropical regions                        | A,G           | Nearctic, Neotropical regions | R. Grande de Orosí, Mexico  | Voucher 307 |
| <i>B. diligens</i>      | F             | S Nearctic region                                        | G             | Nearctic region               | Jalisco, Mexico             | Voucher 171 |
| <i>B. distinguendus</i> | C             | Palaeartic, Nearctic regions                             | G             | Palaeartic, Nearctic regions  | Edesbecka, Finland          | Voucher 197 |
| <i>B. diversus</i>      | A,B,C         | Oriental, Japanese, Palaeartic regions                   | F,H           | Oriental, Palaeartic regions  | Kyushu, Japan               | Voucher 120 |
| <i>B. ecuadorius</i>    | H             | W Neotropical region                                     | A             | Neotropical region            | Abancay, Peru               | Voucher 135 |
| <i>B. ephippiatus</i>   | F,G           | S Nearctic , N Neotropical regions, W Neotropical border | A,G           | Nearctic, Neotropical regions | Chiapas, Mexico             | Voucher 198 |
| <i>B. excellens</i>     | H             | W Neotropical region                                     | A,B,C         | Neotropical region            | Aragua, Venezuela           | Voucher 308 |
| <i>B. exil</i>          | C             | Palaeartic region, Arctic border                         | F             | Palaeartic region             | Hövsgöl Nuur, Mongolia      | Voucher 232 |
| <i>B. eximius</i>       | A             | Oriental region                                          | H             | Oriental region               | Alishan, Taiwan             | Voucher 49  |
| <i>B. fervidus</i>      | D,F           | W Nearctic, E Nearctic, S Nearctic regions               | G             | Nearctic region               | Missouri, USA               | Voucher 309 |
| <i>B. festivus</i>      | A             | Oriental region                                          | H             | Oriental region               | Qionglai Sh, Sichuan, China | Voucher 104 |
| <i>B. filchnerae</i>    | A,C           | Palaeartic, Oriental regions                             | F,H           | Palaeartic, Oriental regions  | Hongyuan, Sichuan, China    | Voucher 206 |
| <i>B. flavescens</i>    | A             | Oriental region, Sumatran border                         | H             | Oriental region               | Mei-fang, Taiwan            | Voucher 181 |
| <i>B. flavidus</i>      | C,D,E         | Palaeartic, W Nearctic, E Nearctic regions               | F,G           | Palaeartic, Nearctic regions  | Lappland Co., Sweden        | Voucher 41  |
| <i>B. flavifrons</i>    | D             | W Nearctic region                                        | G             | Nearctic region               | California, USA             | Voucher 95  |
| <i>B. fragrans</i>      | C             | Palaeartic region                                        | F             | Palaeartic region             | Kayseri Prov., Turkey       | Voucher 61  |
| <i>B. franklini</i>     | D             | W Nearctic region                                        | G             | Nearctic region               | Oregon, USA                 | Voucher 256 |
| <i>B. fraternus</i>     | E             | E Nearctic region, W Nearctic border                     | G             | Nearctic region               | Illinois, USA               | Voucher 183 |
| <i>B. frigidus</i>      | D,E           | W Nearctic, E Nearctic regions, Arctic border            | G             | Nearctic region               | Alaska, USA                 | Voucher 185 |
| <i>B. friseanus</i>     | A             | Oriental region                                          | H             | Oriental region               | Qionglai Sh, Sichuan, China | Voucher 105 |
| <i>B. funebris</i>      | H             | W Neotropical region, S Neotropical border               | A,B           | Neotropical region            | Abancay, Peru               | Voucher 128 |
| <i>B. funerarius</i>    | A             | Oriental region                                          | H             | Oriental region               | Luojishan, Sichuan, Chin    | Voucher 270 |
| <i>B. gerstaeckeri</i>  | C             | Palaeartic region                                        | F             | Palaeartic region             | E. Pyrenees, France         | Voucher 65  |
| <i>B. grahami</i>       | A             | Oriental region                                          | H             | Oriental region               | Meigu, Sichuan, China       | Voucher 273 |
| <i>B. griseocollis</i>  | D,E           | W Nearctic, E Nearctic regions                           | G             | Nearctic region               | Illinois, USA               | Voucher 82  |

| Species                   | BioGeoBEARS 1 | Distribution 1                                                    | BioGeoBEARS 2 | Distribution 2                | Collection locality         | Voucher      |
|---------------------------|---------------|-------------------------------------------------------------------|---------------|-------------------------------|-----------------------------|--------------|
| <i>B. haematurus</i>      | C             | Palearctic region                                                 | F             | Palearctic region             | Trabzon Prov., Turkey       | Voucher 211  |
| <i>B. haemorrhoidalis</i> | A             | Oriental region                                                   | H             | Oriental region               | Chiang Mai Prov., Thailand  | Voucher 191  |
| <i>B. handlirschi</i>     | H             | W Neotropical region                                              | A,B,C         | Neotropical region            | Pasco, Peru                 | Voucher 132  |
| <i>B. handlirschianus</i> | C             | Palearctic region                                                 | F             | Palearctic region             | Artvin Prov., Turkey        | Voucher 87   |
| <i>B. hedini</i>          | A,C           | Palearctic, Oriental regions                                      | F,H           | Palearctic, Oriental regions  | Qionglai Sh, Sichuan, China | Voucher 129  |
| <i>B. honshuensis</i>     | B             | Japanese region                                                   | H             | Oriental region               |                             | J7           |
| <i>B. hortorum</i>        | C             | Palearctic region                                                 | F             | Palearctic region             | Toscana, Italy              | Voucher 5    |
| <i>B. hortulanus</i>      | H             | W Neotropical region                                              | A,B           | Neotropical region            | Magdalena, Colombia         | Voucher 200  |
| <i>B. humilis</i>         | A,C           | Palearctic, Oriental regions                                      | F,H           | Palearctic, Oriental regions  | E. Pyrenees, France         | Voucher 56   |
| <i>B. huntii</i>          | D,F           | W Nearctic, S Nearctic regions                                    | G             | Nearctic region               | Washington, USA             | Voucher 151  |
| <i>B. hyperboreus</i>     | C,K           | Arctic, Palearctic regions                                        | F             | Palearctic region             | Dalarna Co., Sweden         | Voucher 70   |
| <i>B. hypnorum</i>        | A,B,C         | Palearctic, Japanese, Oriental regions, Arctic border             | F,H           | Palearctic, Oriental regions  | Klösterle, Austria          | Voucher 78   |
| <i>B. hypocrita</i>       | B,C           | Japanese, Palearctic regions                                      | F,H           | Oriental, Palearctic regions  | Kyushu, Japan               | Voucher 123  |
| <i>B. ignitus</i>         | A,B           | Oriental, Japanese regions                                        | H             | Oriental region               | Beijing, China              | Voucher 96   |
| <i>B. imitator</i>        | A             | Oriental region                                                   | H             | Oriental region               | Guizhou Prov., China        | Voucher 28   |
| <i>B. impatiens</i>       | E             | E Nearctic region, W Nearctic border                              | G             | Nearctic region               | Illinois, USA               | Voucher 60   |
| <i>B. impetuosus</i>      | A             | Oriental region                                                   | H             | Oriental region               | Xinmian, Sichuan, China     | Voucher 284  |
| <i>B. incertus</i>        | C             | Palearctic region                                                 | F             | Palearctic region             | Erzurum Prov., Turkey       | Voucher 86   |
| <i>B. inexpectatus</i>    | C             | Palearctic region                                                 | F             | Palearctic region             |                             | B05          |
| <i>B. infirmus</i>        | A             | Oriental region                                                   | H             | Oriental region               | Qionglai Sh, Sichuan, China | Voucher 157  |
| <i>B. infrequens</i>      | A             | Oriental region                                                   | H             | Oriental region               | Qionglai Sh, Sichuan, China | Voucher 140  |
| <i>B. insularis</i>       | D,E           | W Nearctic, E Nearctic regions                                    | G             | Nearctic region               | California, USA             | Voucher 162  |
| <i>B. intrudens</i>       | D,F           | E Nearctic, S Nearctic regions, W Nearctic, N Neotropical borders | A,G           | Nearctic, Neotropical regions | Missouri, USA               | Voucher 316  |
| <i>B. jonellus</i>        | C,D,K         | Palearctic, Arctic, W Nearctic regions                            | F,G           | Palearctic, Nearctic regions  | Lappland Co., Sweden        | Voucher 79   |
| <i>B. kashmirensis</i>    | A             | Oriental region, Palearctic border                                | F,H           | Oriental, Palearctic regions  | Hongyuan, Sichuan, China    | Voucher 121  |
| <i>B. keriensis</i>       | A,C           | Oriental, Palearctic regions                                      | F,H           | Oriental, Palearctic regions  | Hongyuan, Sichuan, China    | Voucher 114  |
| <i>B. kirbiellus</i>      | D,K           | Arctic, W Nearctic Regions, E Nearctic border                     | G             | Nearctic region               |                             | Voucher 3534 |

| Species                  | BioGeoBEARS 1 | Distribution 1                                          | BioGeoBEARS 2 | Distribution 2                | Collection locality         | Voucher      |
|--------------------------|---------------|---------------------------------------------------------|---------------|-------------------------------|-----------------------------|--------------|
| <i>B. koreanus</i>       | A,C           | Oriental, Palaearctic regions                           | F,H           | Oriental, Palaearctic regions | Kangwondo, S. Korea         | Voucher 277  |
| <i>B. ladakhensis</i>    | A             | Oriental region, Palaearctic border                     | F,H           | Oriental, Palaearctic regions | Aba, Sichuan, China         | Voucher 158  |
| <i>B. laesus</i>         | A,C           | Palaearctic, Oriental regions                           | F,H           | Palaearctic, Oriental regions | Kars Prov., Turkey          | Voucher 52   |
| <i>B. lapidarius</i>     | C             | Palaearctic region                                      | F             | Palaearctic region            | San Quirico, Italy          | Voucher 6    |
| <i>B. lapponicus</i>     | C,K           | Arctic, Palaearctic regions                             | F             | Palaearctic region            | Lappland Co., Sweden        | Voucher 103  |
| <i>B. longipennis</i>    | A             | Oriental region                                         | H             | Oriental region               |                             | Voucher 1551 |
| <i>B. longipes</i>       | A             | Oriental region, Palaearctic border                     | F,H           | Oriental, Palaearctic regions | Qionglai Sh, Sichuan, China | Voucher 194  |
| <i>B. lucorum</i>        | A,C           | Palaearctic, Oriental regions                           | F,H           | Palaearctic, Oriental regions | E. Pyrenees, France         | Voucher 217  |
| <i>B. luteipes</i>       | A             | Oriental region                                         | H             | Oriental region               | Pokhara, Nepal              | Voucher 195  |
| <i>B. macgregori</i>     | D             | W Nearctic region, E Nearctic border                    | G             | Nearctic region               | Guerrero, Mexico            | Voucher 231  |
| <i>B. magnus</i>         | C             | Palaearctic region                                      | F             | Palaearctic region            |                             | B08          |
| <i>B. margreiteri</i>    | A,C           | Palaearctic, Oriental regions                           | F,H           | Palaearctic, Oriental regions |                             | B01          |
| <i>B. medius</i>         | F,G           | S Nearctic, N Neotropical regions                       | A,G           | Nearctic, Neotropical regions | Chiapas, Mexico             | Voucher 222  |
| <i>B. melaleucus</i>     | G,H           | N Neotropical, W Neotropical regions                    | A,B,C         | Neotropical region            | Oxapampa, Peru              | Voucher 173  |
| <i>B. melanopygus</i>    | D             | W Nearctic region                                       | G             | Nearctic region               | California, USA             | Voucher 215  |
| <i>B. melanurus</i>      | A,C           | Oriental, Palaearctic regions                           | F,H           | Oriental, Palaearctic regions | Dzungarskij Alatau, Kazakh  | Voucher 22   |
| <i>B. mendax</i>         | C             | Palaearctic region                                      | F             | Palaearctic region            | Gurgltal, Austria           | Voucher 19   |
| <i>B. mesomelas</i>      | C             | Palaearctic region                                      | F             | Palaearctic region            | Switzerland                 | Voucher 37   |
| <i>B. mexicanus</i>      | F,G           | S Nearctic, N Neotropical regions, W Neotropical border | A,G           | Nearctic, Neotropical regions | Chiapas, Mexico             | Voucher 220  |
| <i>B. miniatus</i>       | A             | Oriental region                                         | H             | Oriental region               | Himachal Pradesh, India     | Voucher 244  |
| <i>B. mixtus</i>         | D             | W Nearctic region                                       | G             | Nearctic Region               | Washington, USA             | Voucher 24   |
| <i>B. mlokosievitzii</i> | C             | Palaearctic region                                      | F             | Palaearctic Region            | Artvin Prov., Turkey        | Voucher 81   |
| <i>B. modestus</i>       | A,C           | Oriental, Palaearctic regions                           | F,H           | Oriental, Palaearctic Regions | S. Altai, Kazakhstan        | Voucher 238  |
| <i>B. mongolensis</i>    | C             | Palaearctic region                                      | F             | Palaearctic Region            |                             | COI-5P       |
| <i>B. monticola</i>      | C             | Palaearctic region                                      | F             | Palaearctic Region            | E. Pyrenees, France         | Voucher 176  |
| <i>B. morio</i>          | H,I           | W Neotropical, E Neotropical regions                    | A,C,D         | Neotropical Region            | Catalão, Goiás, Brazil      | B13          |
| <i>B. morrisoni</i>      | D             | W Nearctic region, E Nearctic border                    | G             | Nearctic Region               | Utah, USA                   | Voucher 196  |

| Species                     | BioGeoBEARS 1 | Distribution 1                                        | BioGeoBEARS 2 | Distribution 2               | Collection locality           | Voucher      |
|-----------------------------|---------------|-------------------------------------------------------|---------------|------------------------------|-------------------------------|--------------|
| <i>B. mucidus</i>           | C             | Palaeartic region                                     | F             | Palaeartic Region            | E. Pyrenees, France           | Voucher 59   |
| <i>B. muscorum</i>          | C             | Palaeartic region                                     | F             | Palaeartic Region            | Öland Co., Sweden             | Voucher 33   |
| <i>B. neoboreus</i>         | D,K           | Arctic, W Nearctic regions                            | G             | Nearctic Region              | Alaska, USA                   | Voucher 188  |
| <i>B. nevadensis</i>        | D             | W Nearctic region, E Nearctic border                  | G             | Nearctic Region              | Alberta, Canada               | Voucher 139  |
| <i>B. niveatus</i>          | C             | Palaeartic region                                     | F             | Palaeartic Region            | Kayseri Prov., Turkey         | Voucher 93   |
| <i>B. nobilis</i>           | A             | Oriental region                                       | H             | Oriental Region              | Qionglai Sh, Sichuan, China   | Voucher 98   |
| <i>B. norvegicus</i>        | A,B,C         | Palaeartic, Japanese, Oriental regions, Arctic border | F,H           | Palaeartic, Oriental Regions | Dalarna Co., Sweden           | Voucher 89   |
| <i>B. semenovi</i>          | C             | Palaeartic region                                     | F             | Palaeartic Region            | Mt. Kailas, Tibet             | Voucher 234  |
|                             |               |                                                       |               |                              | Montana, USA;New Mexico,      |              |
| <i>B. occidentalis</i>      | D             | W Nearctic region                                     | G             | Nearctic Region              | USA                           | Voucher 26   |
| <i>B. opifex</i>            | H,I           | W Neotropical, E Neotropical regions                  | A,B,C         | Neotropical Region           | Puno, Peru                    | Voucher 175  |
| <i>B. parthenius</i>        | A             | Oriental region                                       | H             | Oriental Region              | Himachal Pradesh, India       | Voucher 241  |
| <i>B. pascuorum</i>         | C             | Palaeartic region                                     | F             | Palaeartic Region            | Toscana, Italy                | Voucher 23   |
| <i>B. minshanensis</i>      | A,C           | Oriental, Palaeartic regions                          | F,H           | Oriental, Palaeartic Regions | Hongyuan, Sichuan, China      | Voucher 111  |
| <i>B. pauloensis</i>        | H,I,J         | W Neotropical, E Neotropical, S Neotropical regions   | A,B,C,D       | Neotropical Region           | Salinas, Minas Gerais, Brazil | 77202        |
| <i>B. pennsylvanicus</i>    | D,F           | W Nearctic, E Nearctic, S Nearctic regions            | G             | Nearctic Region              | Missouri, USA                 | Voucher 317  |
| <i>B. perplexus</i>         | D,E           | W Nearctic, E Nearctic regions                        | G             | Nearctic Region              | Ottawa, Canada                | Voucher 166  |
| <i>B. persicus</i>          | C             | Palaeartic region                                     | F             | Palaeartic Region            | Kars Prov., Turkey            | Voucher 54   |
| <i>B. personatus</i>        | A             | Oriental region                                       | H             | Oriental Region              | Hongyuan, Sichuan, China      | Voucher 138  |
| <i>B. picipes</i>           | A,C           | Oriental, Palaeartic regions                          | F,H           | Oriental, Palaeartic Regions | Qionglai Sh, Sichuan, China   | Voucher 180  |
| <i>B. pyrrhopygus</i>       | D,K           | Arctic, W Nearctic regions                            | F             | Palaeartic Region            |                               | Voucher 3832 |
| <i>B. pomorum</i>           | C             | Palaeartic region                                     | F             | Palaeartic region            | Erzincan Prov., Turkey        | Voucher 53   |
| <i>B. portchinsky</i>       | C             | Palaeartic region                                     | F             | Palaeartic tegion            | Artvin Prov., Turkey          | Voucher 72   |
| <i>B. pratorum</i>          | C             | Palaeartic region, Arctic border                      | F             | Palaeartic region            | Klöße, Austria                | Voucher 75   |
| <i>B. pressus</i>           | A             | Oriental region                                       | H             | Oriental region              | Uttaranchal, India            | Voucher 239  |
| <i>B. pseudobaicalensis</i> | B,C           | Palaeartic, Japanese regions                          | F             | Palaeartic region            | Primorskiy Kray, Russia       | Voucher 253  |
| <i>B. pullatus</i>          | G,H           | N Neotropical, W Neotropical regions                  | A,B           | Neotropical region           | Pitilla, Costa Rica           | Voucher 312  |

| Species                       | BioGeoBEARS 1 | Distribution 1                             | BioGeoBEARS 2 | Distribution 2               | Collection locality         | Voucher     |
|-------------------------------|---------------|--------------------------------------------|---------------|------------------------------|-----------------------------|-------------|
| <i>B. pyrenaicus</i>          | C             | Palearctic region                          | F             | Palearctic region            | Gurgltal, Aust              | Voucher 35  |
| <i>B. pyrosoma</i>            | A             | Oriental region, Palearctic border         | F,H           | Oriental, Palearctic regions |                             | B04         |
| <i>B. quadricolor</i>         | C             | Palearctic region                          | F             | Palearctic region            | Uppland Co., Sweden         | Voucher 90  |
| <i>B. religiosus</i>          | A             | Oriental region                            | H             | Oriental region              | Qionglai Sh, Sichuan, China | Voucher 141 |
| <i>B. robustus</i>            | H             | W Neotropical region                       | A,B           | Neotropical region           | Boyacá, Colombia            | Voucher 50  |
| <i>B. rubicundus</i>          | H             | W Neotropical region                       | A,B           | Neotropical region           | Boyacá, Colombia            | Voucher 202 |
| <i>B. remotus</i>             | A             | Oriental region                            | H             | Oriental region              | Qionglai Sh, Sichuan, China | Voucher 192 |
| <i>B. ruderarius</i>          | C             | Palearctic region                          | F             | Palearctic region            | Obergurgl, Austria          | Voucher 47  |
| <i>B. ruderatus</i>           | C             | Palearctic region                          | F             | Palearctic region            | Valdivia Prov., Chile       | Voucher 18  |
| <i>B. rufocinctus</i>         | D,F           | W Nearctic, E Nearctic, S Nearctic regions | G             | Nearctic region              | Alberta, Canada             | Voucher 186 |
| <i>B. rufofasciatus s. l.</i> | A             | Oriental region, Palearctic border         | F,H           | Oriental, Palearctic regions | Hongyuan, Sichuan, China    | Voucher 133 |
| <i>B. rupestris</i>           | A,C           | Palearctic, Oriental regions               | F,H           | Palearctic, Oriental regions | Uppland Co., Sweden         | Voucher 9   |
| <i>B. sandersoni</i>          | D,E           | W Nearctic, E Nearctic regions             | G             | Nearctic region              | Isle au Haut, Maine, USA    | Voucher 255 |
| <i>B. schrencki</i>           | A,B,C         | Palearctic, Japanese, Oriental regions     | F,H           | Palearctic, Oriental regions | W. Khentey, N. Mongolia     | Voucher 298 |
| <i>B. securus</i>             | A             | Oriental region                            | H             | Oriental region              | Qionglai Sh, Sichuan, China | Voucher 142 |
| <i>B. semenoviellus</i>       | C             | Palearctic region                          | F             | Palearctic region            | Brandenburg, Germany        | Voucher 236 |
| <i>B. sibiricus</i>           | A,C           | Oriental, Palearctic regions               | F,H           | Oriental, Palearctic regions | Khövsgöl Nuur, Mongolia     | Voucher 274 |
| <i>B. sichelii</i>            | A,C           | Oriental, Palearctic regions               | F,H           | Oriental, Palearctic regions | Obergurgl, Austria          | Voucher 34  |
| <i>B. simillimus</i>          | A             | Oriental region                            | H             | Oriental region              | Himachal Pradesh, India     | Voucher 243 |
| <i>B. sitkensis</i>           | D             | W Nearctic region                          | G             | Nearctic region              | California, USA             | Voucher 144 |
| <i>B. skorikovi</i>           | A             | Oriental region                            | H             | Oriental region              | Aba, Sichuan, China         | Voucher 159 |
| <i>B. sonani</i>              | A             | Oriental region                            | H             | Oriental region              |                             | J6          |
| <i>B. soroeensis</i>          | C             | Palearctic region                          | F             | Palearctic region            | E. Pyrenees, France         | Voucher 136 |
| <i>B. sporadicus</i>          | C             | Palearctic region                          | F             | Palearctic region            | Lapland Co., Sweden         | Voucher 193 |
| <i>B. steindachneri</i>       | F             | S Nearctic region                          | G             | Nearctic region              | Morelos, Mexico             | Voucher 313 |
| <i>B. subterraneus</i>        | C             | Palearctic region                          | F             | Palearctic region            | Uppland Co., Sweden         | Voucher 46  |
| <i>B. suckleyi</i>            | D             | W Nearctic region                          | G             | Nearctic region              | Colorado, USA               | Voucher 91  |

| Species                 | BioGeoBEARS 1 | Distribution 1                              | BioGeoBEARS 2 | Distribution 2               | Collection locality         | Voucher     |
|-------------------------|---------------|---------------------------------------------|---------------|------------------------------|-----------------------------|-------------|
| <i>B. sulfureus</i>     | C             | Palearctic region                           | F             | Palearctic region            | Kayseri Prov., Turkey       | Voucher 64  |
| <i>B. superbus</i>      | A             | Oriental region                             | H             | Oriental region              |                             | B02         |
| <i>B. supremus</i>      | A             | Oriental region                             | H             | Oriental region              | Qionglai Sh, Sichuan, China | Voucher 101 |
| <i>B. sylvarum</i>      | C             | Palearctic region                           | F             | Palearctic region            | Uppsala Co., Sweden         | Voucher 110 |
| <i>B. sylvestris</i>    | C             | Palearctic region, Oriental border          | F,H           | Oriental, Palearctic regions | Uppland Co., Sweden         | Voucher 20  |
| <i>B. lapponicus</i>    |               |                                             |               |                              |                             |             |
| <i>sylvicola</i>        | D,K           | Arctic, W Nearctic regions                  | G             | Nearctic region              | New Mexico, USA             | Voucher 108 |
| <i>B. ternarius</i>     | D             | E Nearctic, W Nearctic regions              | G             | Nearctic region              | Nova Scotia, Canada         | Voucher 116 |
| <i>B. terrestris</i>    | C             | Palearctic region                           | F             | Palearctic region            | San Quirico, Italy          | Voucher 3   |
| <i>B. terricola</i>     | D             | E Nearctic, W Nearctic regions              | G             | Nearctic region              | Ontario, Canada             | Voucher 205 |
| <i>B. tichenkoi</i>     | A,C           | Palearctic, Oriental regions, Arctic border | F,H           | Palearctic, Oriental regions |                             | J1          |
| <i>B. transversalis</i> | H,I           | W Neotropical, E Neotropical regions        | B             | Neotropical region           | Madre de Dios, Peru         | Voucher 314 |
| <i>B. tricornis</i>     | C             | Palearctic region, Oriental border          | F,H           | Oriental, Palearctic regions | Primorskiy Kray, Russia     | Voucher 148 |
| <i>B. trifasciatus</i>  | A             | Oriental region                             | H             | Oriental region              | Himachal Pradesh, India     | Voucher 15  |
| <i>B. trinominatus</i>  | F             | S Nearctic region                           | G             | Nearctic region              | Oaxaca, Mexico              | Voucher 229 |
| <i>B. tucumanus</i>     | H             | W Neotropical region, E Neotropical border  | A,B,C         | Neotropical region           | Tucumán, Argentina          | Voucher 276 |
| <i>B. tunicatus</i>     | A             | Oriental region                             | H             | Oriental region              | Uttaranchal, India          | Voucher 248 |
| <i>B. turkestanicus</i> | C             | Palearctic region, Oriental border          | F,H           | Oriental, Palearctic regions |                             | B03         |
| <i>B. ussurensis</i>    | A,B,C         | Oriental, Japanese, Palearctic regions      | F,H           | Oriental, Palearctic regions | S. Korea, Mulan Valley      | Voucher 130 |
| <i>B. vagans</i>        | D,E           | W Nearctic, E Nearctic regions              | G             | Nearctic region              | Wisconsin, US               | Voucher 44  |
| <i>B. vandykei</i>      | D             | W Nearctic region                           | G             | Nearctic region              | Washington, USA             | Voucher 149 |
| <i>B. velox</i>         | C             | Palearctic region                           | F             | Palearctic region            | Artvin Prov., Turkey        | Voucher 94  |
| <i>B. vestalis</i>      | C             | Palearctic region                           | F             | Palearctic region            | Kent, England               | Voucher 169 |
| <i>B. veteranus</i>     | C             | Palearctic region                           | F             | Palearctic region            | Jura, France                | Voucher 187 |
| <i>B. vogti</i>         | H             | W Neotropical region                        | A,B           | Neotropical region           | Abancay, Peru               | Voucher 172 |
| <i>B. vosnesenskii</i>  | D             | W Nearctic region                           | G             | Nearctic region              | Washington, USA             | Voucher 112 |
| <i>B. waltoni</i>       | A             | Oriental region                             | H             | Oriental region              | Qionglai Sh, Sichuan, China | Voucher 102 |



| Species                  | BioGeoBEARS 1 | Distribution 1                      | BioGeoBEARS 2 | Distribution 2                | Collection locality         | Voucher     |
|--------------------------|---------------|-------------------------------------|---------------|-------------------------------|-----------------------------|-------------|
| <i>B. weisi</i>          | F,G           | S Nearctic, N Neotropical regions   | A,G           | Nearctic, Neotropical regions | Jalisco, Mexico             | Voucher 315 |
| <i>B. wurflenii</i>      | C             | Palaearctic region                  | F             | Palaearctic region            | Obergurgl, Austria          | Voucher 1   |
| <i>B. zonatus</i>        | C             | Palaearctic region                  | F             | Palaearctic region            | Aksaray Prov., Turkey       | Voucher 63  |
| <i>B. natvigii</i>       | D,K           | Arctic, W Nearctic Regions          | G             | Nearctic region               |                             | B06         |
| <i>B. jacobsoni</i>      | A             | Oriental region                     | H             | Oriental region               |                             | COI-5P5     |
| <i>B. lantschouensis</i> | A,C           | Palaearctic, Oriental regions       | F,H           | Palaearctic, Oriental regions |                             | 6873A01     |
| <i>B. minshanensis</i>   | A             | Oriental Region                     | H             | Oriental region               |                             | 6873B05     |
| <i>B. unicus</i>         | C             | Palaearctic region                  | F             | Palaearctic region            |                             | COI-5P3     |
| <i>B. chinensis</i>      | A             | Oriental region                     | H             | Oriental region               | Qionglai Sh, Sichuan, China | Voucher 152 |
| <i>B. tibetanus</i>      | A             | Oriental region                     | H             | Oriental region               | Min Shan, Sichuan, China    | Voucher 134 |
| <i>B. turneri</i>        | A             | Oriental region                     | H             | Oriental region               |                             | B09         |
| <i>B. avanus</i>         | A             | Oriental region                     | H             | Oriental region               | Luojishan, Sichuan, China   | Voucher 272 |
| <i>B. lemmiscatus</i>    | A             | Oriental region                     | H             | Oriental region               | Qionglai Sh, Sichuan, China | Voucher 161 |
| <i>B. lepidus</i>        | A             | Oriental region                     | H             | Oriental region               | Qionglai Sh, Sichuan, China | Voucher 155 |
| <i>B. amurensis</i>      | C             | Palaearctic region, Oriental border | F,H           | Oriental, Palaearctic regions |                             | COI 5P2     |
| <i>B. formosellus</i>    | A             | Oriental region                     | F,H           | Oriental, Palaearctic regions |                             | J2          |

## References

1. Williams, P.H. Mapping Variations in the Strength and Breadth of Biogeographic Transition Zones Using Species Turnover. *Proc. R. Soc. Lond. B Biol. Sci.* **1996**, *263*, 579–588.
2. Williams, P. An Annotated Checklist of Bumble Bees with an Analysis of Patterns of Description (Hymenoptera: Apidae, Bombini). *Bull. Nat. Hist. Mus. Entomol.* **1998**, *67*, 79–152.
