# Supplementary material for: Biogeography and Diversification of Bumblebees (Hymenoptera: Apidae), with Emphasis on Neotropical Species
Source: MDPI journal article supplement (doi:10.3390/d14040238), 2022-03-25
Supplement: s1 [file s1]

**Table S1.** Specimens sequenced for the genetic analyses with their geographic origins and specimens belonging to GenBank and BOLD Systems, which were used in phylogenetic. Numbers between parentheses refer to the number of sequenced *Bombus* specimens.

| Species                                                 | Collection locality         | Voucher | 16S (245) | EF-1 $\alpha$ (254) | Opsin (240) | ArgK (238) | PEPCK (247) | CytB (80) | COI (185)  | 12S (18) | OBS                                    |
|---------------------------------------------------------|-----------------------------|---------|-----------|---------------------|-------------|------------|-------------|-----------|------------|----------|----------------------------------------|
| <i>B. (Alpigenobombus) breviceps</i> Smith, 1852        | Chiang Mai, Thailand        | 190     | DQ787983  | DQ788165            | DQ788320    | DQ788408   | EF050915    |           | FJ175357   |          |                                        |
| <i>B. (Alpigenobombus) grahami</i> Frison, 1933         | Meigu, Sichuan, China       | 273     | EF032347  | EF032371            | EF032389    | EF032408   | EF050916    |           | FJ175354   |          |                                        |
| <i>B. (Alpigenobombus) kashmirensis</i> Friese, 1909    | Hongyuan, Sichuan, China    | 121     | DQ788040  | DQ788215            | DQ788342    | DQ788447   | EF050913    |           |            |          |                                        |
| <i>B. (Alpigenobombus) nobilis</i> Friese, 1905         | Qionglai Sh, Sichuan, China | 98      | DQ788071  | DQ788245            | AY739485    | DQ788473   | EF050912    |           |            |          |                                        |
| <i>B. (Alpigenobombus) wurflenii</i> Radoszkowski, 1860 | Obergurgl, Austria          | 1       | DQ788137  | DQ788305            | AF493007    | AF492873   | EF050914    | AF066975  | FJ175355   |          |                                        |
| <i>B. (Alpinobombus) alpinus</i> Linnaeus, 1758         | Gurgltal, Austria           | 29      | DQ787963  | DQ788146            | AY739452    | DQ788393   | EF050871    |           | HQ948121   |          |                                        |
| <i>B. (Alpinobombus) balteatus</i> Dahlbom, 1832        | Lappland Co., Sweden        | 39      | DQ787974  | DQ788157            | AY739455    | DQ788402   | EF050870    | AF066967  | AY181097   |          |                                        |
| <i>B. (Alpinobombus) hyperboreus</i> Schönherr, 1809    | Dalarna Co., Sweden         | 70      | DQ788028  | DQ788204            | AY739470    | DQ788440   | EF050868    | AF066968  | AY181108   |          |                                        |
| <i>B. (Alpinobombus) kirbiellus</i> Curtis, 1835        |                             | 3534    |           |                     |             |            | KT954154    |           |            |          |                                        |
| <i>B. (Alpinobombus) natoigi</i> Richards, 1931         |                             | B06     |           |                     |             |            | KP901106    |           |            |          |                                        |
| <i>B. (Alpinobombus) neoboreus</i> Sladen, 1919         | Alaska, USA                 | 188     | DQ788068  | DQ788242            | AY739484    | DQ788470   | EF050869    |           |            |          |                                        |
| <i>B. (Alpinobombus) polaris</i> Curtis, 1835           | Lappland Co., Sweden        | 223     | DQ788083  | AF492970            | AF493037    | AF492903   | EF050872    |           | AY181144   |          | It is renamed to <i>B. pyrrhopygus</i> |
| <i>B. (Alpinobombus) pyrrhopygus</i> Friese, 1902       |                             | 3832    |           |                     |             |            | KT954150    |           |            |          |                                        |
| <i>B. (Bombias) auricomus</i> Robertson, 1903           | Illinois, USA               | 62      | DQ787972  | DQ788154            | AY739454    | AF492892   | EF051014    |           | KM585615   |          | It is renamed to <i>B. nevadensis</i>  |
| <i>B. (Bombias) confusus</i> Schenk, 1859               | Dorres, France              | 83      | DQ787992  | DQ788173            | DQ788324    | DQ788414   | EF051016    |           | KJ838797   |          |                                        |
| <i>B. (Bombias) nevadensis</i> Cresson, 1874            | Alberta, Canada             | 139     | DQ788069  | DQ788243            | DQ788352    | DQ788471   | EF051015    | AF077920  | AF066990   |          |                                        |
| <i>B. (Bombus) affinis</i> Cresson, 1863                | Illinois, USA               | 167     | DQ787961  | DQ788144            | AY739451    | DQ788391   | EF050860    |           | GU707738   |          |                                        |
| <i>B. (Bombus) cryptarum</i> (Fabricius, 1775)          | Erzincan Prov., Turkey      | 127     | DQ787995  | DQ788175            | AY739461    | DQ788416   | EF050855    |           | JQ843418   |          |                                        |
| <i>B. (Bombus) franklini</i> (Frison, 1921)             | Oregon, USA                 | 256     | EF032345  | EF032366            | EF032385    | EF032403   | EF050861    |           | AY694097   |          |                                        |
| <i>B. (Bombus) hypocrita</i> Pérez, 1905                | Kyushu, Japan               | 123     | DQ788030  | DQ788206            | AF493023    | AF492889   | EF050864    | JQ820710  | JQ843426   |          |                                        |
| <i>B. (Bombus) ignitus</i> Smith, 1869                  | Beijing, China              | 96      | DQ788031  | DQ788207            | AF493032    | AF492898   | EF050866    | EU110100  | JQ843438   |          |                                        |
| <i>B. (Bombus) jacobsoni</i> Skorikov, 1912             |                             | COI-5P5 |           |                     |             |            |             |           | BBBO397-11 |          | It's the same the voucher JQ843439     |
| <i>B. (Bombus) lantschouensis</i> Vogt, 1908            |                             | 6873A01 |           |                     |             |            |             |           | JQ692953   |          |                                        |

| Species                                                          | Collection locality         | Voucher | 16S (245) | EF-1α (254) | Opsin (240) | ArgK (238) | PEPCK (247) | CytB (80) | COI (185)  | 12S (18) | OBS                                                                                              |
|------------------------------------------------------------------|-----------------------------|---------|-----------|-------------|-------------|------------|-------------|-----------|------------|----------|--------------------------------------------------------------------------------------------------|
| <i>B. (Bombus) longipennis</i> Friese, 1918                      |                             | 1551    |           |             |             |            |             |           | JQ843472   |          |                                                                                                  |
| <i>B. (Bombus) lucorum</i> (Linnaeus, 1761)                      | E. Pyrenees, France         | 217     | DQ788051  | DQ788225    | AF493021    | AF492887   | EF050862    | JQ820751  | LN714024   |          |                                                                                                  |
| <i>B. (Bombus) lucorum</i> (Linnaeus, 1761)                      | Qionglai Sh, Sichuan, China | 184     | DQ788050  | DQ788224    | AY739479    | DQ788456   | EF050863    | EF469487  | AF279497   |          | According to Paul Willians this species maybe is <i>B. longipennis</i> Friese, 1918.             |
| <i>B. (Bombus) lucorum lucorum</i> (Linnaeus, 1761)              |                             | LucL24  |           | JQ820938    |             |            | JQ821143    | JQ820735  | JQ820532   |          |                                                                                                  |
| <i>B. (Bombus) lucorum renardi</i> (Linnaeus, 1761)              |                             | LucR18  |           | JQ820956    |             |            | JQ821161    | JQ820753  | JQ820550   |          |                                                                                                  |
| <i>B. (Bombus) magnus</i> Vogt, 1911                             |                             | B08     |           |             |             |            |             |           | AY181124   |          |                                                                                                  |
| <i>B. (Bombus) minshanensis</i> Bischoff, 1936                   |                             | 6873B05 |           |             |             |            |             |           | JQ692961   |          |                                                                                                  |
| <i>B. (Bombus) moderatus</i> Cresson, 1863                       | Alberta, Canada             | 163     | DQ788062  | DQ788236    | AY739481    | DQ788464   | EF050856    |           | KR901669   |          | It is renamed to <i>B. (Bombus) cryptarum moderatus</i> Cresson, 1863                            |
|                                                                  | Montana, USA;New Mexico,    |         |           |             |             |            |             |           |            |          |                                                                                                  |
| <i>B. (Bombus) occidentalis</i> Greene, 1858                     | USA                         | 26      | DQ788074  | DQ788248    | AY739486    | DQ788476   | EF050858    |           | JQ692962   |          |                                                                                                  |
|                                                                  |                             |         |           |             |             |            |             |           |            |          | According to Paul Willians this species maybe is <i>B. (Bombus) minshanensis</i> Bischoff, 1936. |
| <i>B. (Bombus) patagiatus</i> Nylander, 1848                     | Hongyuan, Sichuan, China    | 111     | DQ788078  | DQ788252    | AF493020    | AF492886   | EF050857    | EF469488  | JQ843590   |          |                                                                                                  |
| <i>B. (Bombus) sporadicus</i> Nylander, 1848                     | Lappland Co., Sweden        | 193     | DQ788108  | DQ788279    | AY739491    | DQ788501   | EF050867    | JQ820819  | JQ843602   |          |                                                                                                  |
| <i>B. (Bombus) terrestris</i> (Linnaeus, 1758)                   | San Quirico, Italy          | 3       | DQ788118  | DQ788288    | AF493022    | AF492888   | EF050865    | KP670308  | JQ843670   |          |                                                                                                  |
| <i>B. (Bombus) terrestris xanthopus</i> Kriechbaumer, 1870       |                             | TerX19  |           | JQ821081    |             |            | JQ821284    | JQ820876  | JQ820674   |          |                                                                                                  |
| <i>B. (Bombus) terricola</i> Kirby, 1837                         | Ontario, Canada             | 205     | DQ788119  | DQ788289    | AF493019    | AF492885   | EF050859    |           | GU707716   |          |                                                                                                  |
| <i>B. (Bombus) tunicatus</i> Smith, 1852                         | Uttaranchal, India          | 248     | DQ788124  |             |             |            |             |           | JQ843676   |          |                                                                                                  |
| <i>B. (Cullumanobombus) cullumanus apollineus</i> Skorikov, 1910 | Erzurum Prov., Turkey       | 84      | DQ787964  | DQ788147    | DQ788313    | DQ788394   | EF050890    |           |            |          | Synonymous of <i>B. cullumanus</i>                                                               |
| <i>B. (Cullumanobombus) baeri</i> Vachal, 1904                   | Puno, Peru                  | 174     | DQ787973  | DQ788156    | DQ788317    | DQ788401   | EF050886    |           |            |          |                                                                                                  |
| <i>B. (Cullumanobombus) brachycephalus</i> Handlirsch, 1888      | Guerrero, Mexico            | 230     | DQ787982  | DQ788163    | DQ788319    | DQ788407   | EF050889    |           |            |          |                                                                                                  |
| <i>B. (Cullumanobombus) coccineus</i> Friese, 1903               | Huarochiri, Peru            | 137     | DQ787991  | DQ788172    | DQ788323    | DQ788413   | EF050885    |           |            |          |                                                                                                  |
| <i>B. (Cullumanobombus) crotchii</i> Cresson, 1878               | California, USA             | 71      | DQ787994  | AF492973    | AF493040    | AF492906   | EF050882    |           |            |          |                                                                                                  |
| <i>B. (Cullumanobombus) cullumanus</i> (Kirby, 1802)             |                             | COI-5P4 |           |             |             |            |             |           | BBWP490-10 |          | Voucher 84                                                                                       |
| <i>B. (Cullumanobombus) ecuadorius</i> Meunier, 1890             | Abancay, Peru               | 135     | DQ788001  | DQ788181    | DQ788329    | DQ788421   | EF050874    |           |            |          |                                                                                                  |

| Species                                                      | Collection locality   | Voucher | 16S (245) | EF-1α (254) | Opsin (240) | ArgK (238) | PEPCK (247) | CytB (80) | COI (185)  | 12S (18) | OBS                                |
|--------------------------------------------------------------|-----------------------|---------|-----------|-------------|-------------|------------|-------------|-----------|------------|----------|------------------------------------|
| <i>B. (Cullumanobombus) fraternus</i> (Smith, 1854)          | Illinois, USA         | 183     | DQ788013  | AF492974    | AF493041    | AF492907   | EF050884    |           | KM585682   |          |                                    |
| <i>B. (Cullumanobombus) funebris</i> Smith, 1854             | Abancay, Peru         | 128     | DQ788016  | DQ788194    | DQ788334    | DQ788433   | EF050883    | AF066974  | KC853374   |          |                                    |
| <i>B. (Cullumanobombus) griseocollis</i> (DeGeer, 1773)      | Illinois, USA         | 82      | DQ788018  | DQ788196    | AF493039    | AF492905   | EF050879    |           |            |          |                                    |
| <i>B. (Cullumanobombus) handlirschi</i> Friese, 1903         | Pasco, Peru           | 132     | DQ788021  | DQ788197    | DQ788336    | DQ788435   | EF050887    |           |            |          |                                    |
| <i>B. (Cullumanobombus) hortulanus</i> Smith, 1904           | Magdalena, Colombia   | 200     | DQ788025  | DQ788201    | AY739468    | DQ788438   | EF050875    |           |            |          |                                    |
| <i>B. (Cullumanobombus) macgregori</i> Labougle & Ayala 1985 | Guerrero, Mexico      | 231     | DQ788053  | DQ788226    | DQ788347    | DQ788457   | EF050881    |           |            |          |                                    |
| <i>B. (Cullumanobombus) melaleucus</i> Handlirsch, 1888      | Oxapampa, Peru        | 173     | DQ787960  | DQ788143    | DQ788311    | DQ788460   | EF050876    |           |            |          |                                    |
| <i>B. (Cullumanobombus) morrisoni</i> Cresson, 1878          | Utah, USA             | 196     | DQ788065  | DQ788240    | DQ788350    | DQ788468   | EF050880    |           |            |          |                                    |
| <i>B. (Cullumanobombus) robustus</i> Smith, 1854             | Boyacá, Colombia      | 50      | DQ788093  | DQ788266    | DQ788366    | EF032405   | EF050877    | AF066973  | AF066986   |          |                                    |
| <i>B. (Cullumanobombus) rubicundus</i> Smith, 1854           | Boyacá, Colombia      | 202     | DQ788094  | DQ788267    | DQ788367    | DQ788491   | EF050888    |           |            |          |                                    |
| <i>B. (Cullumanobombus) rufocinctus</i> Cresson, 1863        | Alberta, Canada       | 186     | DQ788097  | DQ788268    | AF493034    | AF492900   | EF050892    |           | KT706869   |          |                                    |
| <i>B. (Cullumanobombus) semenoviellus</i> Skorikov, 1910     | Brandenburg, Germany  | 236     | DQ788101  | DQ788271    | DQ788369    | DQ788494   | EF050891    |           | KJ839366   |          |                                    |
| <i>B. (Cullumanobombus) tucumanus</i> Vachal, 1904           | Tucumán, Argentina    | 276     | EF032349  | EF032367    | EF032386    | EF032404   | EF050873    |           |            |          |                                    |
| <i>B. (Cullumanobombus) unicus</i> Morawitz, 1883            |                       | COI-5P3 |           |             |             |            |             |           | BBBO198-10 |          |                                    |
| <i>B. (Cullumanobombus) vogti</i> Friese, 1903               | Abancay, Peru         | 172     | DQ788130  | DQ788299    | DQ788383    | DQ788517   | EF050878    |           |            |          |                                    |
| <i>B. (Cullumanobombus) volucelloides</i> Gribodo, 1892      | San Jose, Costa Rica  | 122     | DQ788131  | AY267133    | AY267149    | AY267165   |             |           |            |          | Synonymous of <i>B. melaleucus</i> |
| <i>B. (Kallobombus) soroensis</i> (Fabricius, 1777)          | E. Pyrenees, France   | 136     | DQ788107  | DQ788278    | AF493008    | AF492874   | EF051013    |           | KJ839741   |          |                                    |
| <i>B. (Megabombus) argillaceus</i> (Scopoli, 1763)           | Kayseri Prov., Turkey | 58      | DQ787967  | DQ788150    | AY739453    | DQ788396   | EF051001    | AF066965  | KP671609   |          |                                    |
| <i>B. (Megabombus) bicoloratus</i> Smith, 1879               | Nantou, Taiwan        | 225     | DQ787976  | AF492971    | AF493038    | AF492904   | EF051005    |           | KP671641   |          |                                    |
| <i>B. (Megabombus) consobrinus</i> Dahlbom, 1832             | Altai Mts, Kazakhstan | 261     | EF032354  | EF032379    | AY267150    | AY267166   | EF050994    | EF469489  | KT334303   |          |                                    |
| <i>B. (Megabombus) czerskii</i> Skorikov, 1910               |                       | CZ00024 |           |             |             |            |             | EF469490  | KJ734241   |          |                                    |
| <i>B. (Megabombus) diversus</i> Smith, 1869                  | Kyushu, Japan         | 120     | DQ788000  | AF492961    | AF493028    | AF492894   | EF051010    |           | KT334306   |          |                                    |
| <i>B. (Megabombus) gerstaeckeri</i> Morawitz, 1881           | E. Pyrenees, France   | 65      | DQ788017  | DQ788195    | DQ788335    | DQ788434   | EF051003    |           | KT334300   |          |                                    |
| <i>B. (Megabombus) hortorum</i> (Linnaeus, 1761)             | Toscana, Italy        | 5       | DQ788024  | DQ788200    | AF492987    | AF492853   | EF050999    | JQ820706  | KP671630   |          |                                    |
| <i>B. (Megabombus) hortorum jonghei</i> (Linnaeus, 1761)     |                       | HorJ01  |           | JQ820911    |             |            | JQ821116    | JQ820708  | KF468689   |          |                                    |
| <i>B. (Megabombus) hortorum hortorum</i> (Linnaeus, 1761)    |                       | HorH01  |           | JQ820909    |             |            | JQ821114    | JQ820706  | JQ820505   |          |                                    |
| <i>B. (Megabombus) koreanus</i> (Skorikov, 1933)             | Kangwondo, S. Korea   | 277     | EF032355  | AF492969    | AF493036    | AF492902   | EF050995    |           | KJ734250   |          |                                    |

| Species                                                        | Collection locality         | Voucher | 16S (245) | EF-1α (254) | Opsin (240) | ArgK (238) | PEPCK (247) | CytB (80) | COI (185) | 12S (18) | OBS                                     |
|----------------------------------------------------------------|-----------------------------|---------|-----------|-------------|-------------|------------|-------------|-----------|-----------|----------|-----------------------------------------|
| <i>B. (Megabombus) bicoloratus kulingensis</i> Cockerell, 1917 | Zhejiang Prov., China       | 97      | DQ788042  | DQ788217    | DQ788343    | DQ788449   | EF051006    |           | FJ175232  |          | Synonymous of <i>B. bicoloratus</i>     |
| <i>B. (Megabombus) longipes</i> Friese, 1905                   | Qionglai Sh, Sichuan, China | 194     | DQ788049  | DQ788223    | DQ788346    | DQ788455   | EF051009    |           | KP671681  |          |                                         |
| <i>B. (Megabombus) portchinsky</i> Radoszkowski, 1883          | Artvin Prov., Turkey        | 72      | DQ788085  | DQ788259    | DQ788361    | DQ788484   | EF051000    |           | KJ734252  |          |                                         |
| <i>B. (Megabombus) religiosus</i> (Frison, 1935)               | Qionglai Sh, Sichuan, China | 141     | DQ788091  | DQ788264    | DQ788364    | DQ788489   | EF050998    |           | KP671608  |          |                                         |
| <i>B. (Megabombus) ruderatus</i> (Fabricius, 1775)             | Valdivia Prov., Chile       | 18      | DQ788096  | AF492977    | AF493044    | AF492910   | EF051002    | JQ820816  | KP671610  |          |                                         |
| <i>B. (Megabombus) ruderatus ruderatus</i> (Fabricius, 1775)   |                             | RudR20  |           | JQ821021    |             |            | JQ821226    | JQ820816  | JQ820615  |          |                                         |
| <i>B. (Megabombus) ruderatus autumnalis</i> (Fabricius, 1775)  |                             | RudA05  |           | JQ820982    |             |            | JQ821187    | JQ820777  | JQ820576  |          |                                         |
| <i>B. (Megabombus) ruderatus corsicola</i> (Fabricius, 1775)   |                             | RudC19  |           | JQ821001    |             |            | JQ821206    | JQ820796  | JQ820595  |          |                                         |
| <i>B. (Megabombus) securus</i> (Frison, 1935)                  | Qionglai Sh, Sichuan, China | 142     | DQ788100  | DQ788270    | DQ788368    | DQ788493   | EF050997    |           | KJ734256  |          |                                         |
| <i>B. (Megabombus) supremus</i> Morawitz, 1887                 | Qionglai Sh, Sichuan, China | 101     | DQ788112  | DQ788284    | DQ788375    | DQ788505   | EF051004    |           | KP671604  |          |                                         |
| <i>B. (Megabombus) sushkini</i> s.l. (Skorikov, 1931)          | Hongyuan, Sichuan, China    | 143     | DQ788113  | AF492921    | AF492988    | AF492854   | EF050996    |           | KT334302  |          | Synonymous of <i>B. tichenkoi</i>       |
| <i>B. (Megabombus) tichenkoi</i> (Skorikov, 1923)              |                             | J1      |           | AF492922    | AF492989    | AF492855   |             |           | AF279518  |          | It is renamed to <i>B. (Megabombus)</i> |
| <i>B. (Megabombus) trifasciatus</i> Smith, 1852                | Himachal Pradesh, India     | 15      | DQ788122  | AF492918    | AF492985    | AF492851   | EF051007    |           | FJ175236  |          | <i>albopleuralis</i> Friese, 1916       |
| <i>B. (Megabombus) ussurensis</i> Radoszkowski, 1877           | S. Korea, Mulan Valley      | 130     | AF364829  | AF492919    | AF492986    | AF492852   | EF051008    |           | KP671675  |          |                                         |
| <i>B. (Megabombus) trifasciatus wilemani</i> Cockerell, 1911   | Meifang, Taiwan             | 182     | DQ788135  |             |             |            |             |           |           |          | Synonymous of <i>B. trifasciatus</i>    |
| <i>B. (Melanobombus) alagesianus</i> (Skorikov, 1923)          | Artvin Prov., Turkey        | 85      | DQ787962  | DQ788145    | DQ788312    | DQ788392   | EF050903    | KC915396  | KM458064  |          | Synonymous of <i>B. keriensis</i>       |
| <i>B. (Melanobombus) caucasicus</i> Radoszkowski, 1860         |                             | L084TR  |           | KC916483    | KC915984    |            | KC916232    | KC915481  | KC915732  |          | <i>B. lapidarius caucasicus</i>         |
| <i>B. (Melanobombus) sichelii erzurumensis</i> Özbek, 1990     | Artvin Prov., Turkey        | 126     | DQ788003  | DQ788183    | AY739463    | DQ788423   | EF050899    |           | KM458066  |          | Synonymous of <i>B. sichelii</i>        |
| <i>B. (Melanobombus) eximius</i> Smith, 1852                   | Alishan, Taiwan             | 49      | DQ788005  | DQ788186    | AY739464    | DQ788426   | EF050911    |           | GU085206  |          |                                         |
| <i>B. (Melanobombus) festivus</i> Smith, 1861                  | Qionglai Sh, Sichuan, China | 104     | DQ788007  | DQ788187    | AY739465    | DQ788427   | EF050910    |           |           |          |                                         |
| <i>B. (Melanobombus) formosellus</i> (Frison, 1934)            |                             | J2      |           | AF492939    | AF493006    | AF492872   |             |           | AF279522  |          | Synonymous of <i>B. pyrosoma</i>        |
| <i>B. (Melanobombus) friseanus</i> Skorikov, 1933              | Qionglai Sh, Sichuan, China | 105     | DQ788015  | DQ788193    | AY739467    | DQ788432   | EF050906    |           |           |          |                                         |
| <i>B. (Melanobombus) incertus</i> Morawitz, 1881               | Erzurum Prov., Turkey       | 86      | DQ788035  | DQ788211    | DQ788341    | DQ788443   | EF050901    | KC915397  | KC915649  |          |                                         |
| <i>B. (Melanobombus) keriensis</i> s. l. Morawitz, 1887        | Hongyuan, Sichuan, China    | 114     | DQ788041  | DQ788216    | AY739474    | DQ788448   | EF050904    |           |           |          |                                         |
| <i>B. (Melanobombus) ladakhensis</i> Richards, 1928            | Aba, Sichuan, China         | 158     | DQ788043  | AY739575    | AY739475    | DQ788450   | EF050905    |           |           |          |                                         |
| <i>B. (Melanobombus) lapidarius</i> (Linnaeus, 1758)           | San Quirico, Italy          | 6       | DQ788045  | DQ788219    | AF493005    | AF492871   | EF050902    | KC915637  | KF936492  |          |                                         |

| Species                                                  | Collection locality         | Voucher | 16S (245) | EF-1α (254) | Opsin (240) | ArgK (238) | PEPCK (247) | CytB (80) | COI (185) | 12S (18) | OBS                                           |
|----------------------------------------------------------|-----------------------------|---------|-----------|-------------|-------------|------------|-------------|-----------|-----------|----------|-----------------------------------------------|
| <i>B. (Melanobombus) miniatus</i> s. l. Bingham, 1897    | Himachal Pradesh, India     | 244     | DQ788059  | DQ788233    | DQ788348    | DQ788462   | EF050908    |           |           |          |                                               |
| <i>B. (Melanobombus) pyrosoma</i> Morawitz, 1890         |                             | B04     | FJ159114  |             |             |            |             | EF424427  | DQ835585  |          |                                               |
| <i>B. (Melanobombus) rufofasciatus</i> s. l. Smith, 1852 | Hongyuan, Sichuan, China    | 133     | DQ788098  | DQ788269    | AY739489    | DQ788492   | EF050907    |           |           |          |                                               |
| <i>B. (Melanobombus) sichelii</i> Radoszkowski, 1860     | Obergurgl, Austria          | 34      | DQ788103  | DQ788273    | DQ788371    | DQ788496   | EF050900    | KC915640  | KJ839131  |          |                                               |
| <i>B. (Melanobombus) simillimus</i> Smith, 1852          | Himachal Pradesh, India     | 243     | DQ788104  | DQ788274    | DQ788372    | DQ788497   | EF050909    |           |           |          |                                               |
| <i>B. (Mendacibombus) avinoviellus</i> (Skorikov, 1914)  | Himachal Pradesh, India     | 242     | AY268416  | DQ788155    | AY268394    | DQ788400   | EF051020    | AF181610  |           |          | Mistake in table of Cameron et al. 2007       |
| <i>B. (Mendacibombus) convexus</i> Wang, 1979            | Qionglai Sh, Sichuan, China | 109     | DQ787993  | DQ788174    | DQ788325    | DQ788415   | EF051021    |           |           |          |                                               |
| <i>B. (Mendacibombus) defector</i> Skorikov, 1910        |                             | J3      | KX452099  | AF492958    | AF493025    | AF492891   | KX452106    |           | AF385807  |          |                                               |
| <i>B. (Mendacibombus) handlirschianus</i> Vogt, 1909     | Artvin Prov., Turkey        | 87      | DQ788022  | DQ788198    | DQ788337    | DQ788436   | EF051017    |           |           |          |                                               |
| <i>B. (Mendacibombus) margreiteri</i> Vogt, 1910         |                             | B01     | KX452100  |             |             |            | KX452107    |           |           |          |                                               |
| <i>B. (Mendacibombus) mendax</i> Gerstaecker, 1869       | Gurgltal, Austria           | 19      | DQ788057  | AY739584    | AF493024    | AF492890   | EF051019    |           | HQ563801  |          |                                               |
|                                                          |                             |         |           |             |             |            |             |           |           |          | It is renamed to <i>B. (Mendacibombus)</i>    |
|                                                          |                             |         |           |             |             |            |             |           |           |          | <i>handlirschianus shaposhnikov</i> Skorikov, |
| <i>B. (Mendacibombus) shaposhnikov</i> Skorikov, 1910    | Artvin Prov., Turkey        | 99      | DQ788102  | DQ788272    | DQ788370    | DQ788495   | EF051018    | JQ820818  | JQ820617  |          | 1910                                          |
| <i>B. (Mendacibombus) superbus</i> (Tkalcu, 1968)        |                             | B02     | KX452097  |             | KX452101    |            | KX452104    |           |           |          |                                               |
| <i>B. (Mendacibombus) turkestanicus</i> Skorikov, 1910   |                             | B03     | KX452098  |             | KX452102    |            | KX452105    |           |           |          |                                               |
| <i>B. (Mendacibombus) waltoni</i> Cockerell, 1910        | Qionglai Sh, Sichuan, China | 102     | DQ788134  | DQ788302    | DQ788385    | DQ788519   | EF051022    |           | GU085207  |          |                                               |
| <i>B. (Orientalibombus) funerarius</i> Smith, 1852       | Luojishan, Sichuan, Chin    | 270     | EF032356  | EF032378    | EF032396    | EF032415   | EF051012    |           | FJ175342  |          |                                               |
| <i>B. (Orientalibombus) haemorrhoidalis</i> Smith, 1852  | Chiang Mai Prov., Thailand  | 191     | DQ788020  | AF492983    | AF493050    | AF492916   | EF051011    |           | KT334307  |          | Mistake in table of Cameron et al. 2007       |
|                                                          |                             |         |           |             |             |            |             |           |           |          | Synonymous of <i>B. bohemicus</i> and         |
| <i>B. (Psithyrus) bohemicus ashtoni</i> (Cresson, 1864)  | Ottawa, Canada              | 164     | DQ787969  | AF492924    | AF492991    | AF492857   | EF050978    |           | FJ582103  |          | mistake in table of Cameron et al. 2007       |
| <i>B. (Psithyrus) barbutellus</i> (Kirby, 1802)          | Uppland Co., Sweden         | 73      | DQ787975  | DQ788158    | DQ788318    | DQ788403   | EF050972    |           | KJ839426  |          |                                               |
| <i>B. (Psithyrus) bohemicus</i> Seidl, 1937              | E. Pyrenees, France         | 55      | DQ787980  | AF492925    | AF492992    | AF492858   | EF050979    | JQ820705  | KJ839694  |          |                                               |
| <i>B. (Psithyrus) campestris</i> (Panzer, 1801)          | Dalarna Co., Sweden         | 40      | DQ787986  | AF492927    | AF492994    | AF492860   | EF050974    |           | HM401453  |          |                                               |
| <i>B. (Psithyrus) chinensis</i> (Morawitz, 1890)         | Qionglai Sh, Sichuan, China | 152     | DQ787988  | DQ788170    | DQ788321    | DQ788412   | EF050982    |           |           |          |                                               |
| <i>B. (Psithyrus) citrinus</i> (Smith, 1854)             | Virginia, USA               | 170     | DQ787990  | DQ788171    | DQ788322    | AY267169   | EF050975    |           | FJ582113  |          |                                               |
| <i>B. (Psithyrus) coreanus</i> (Yasumatsu, 1934)         |                             | J4      | AF364830  |             |             |            |             |           |           |          |                                               |

| Species                                                            | Collection locality       | Voucher | 16S (245) | EF-1α (254) | Opsin (240) | ArgK (238) | PEPCK (247) | CytB (80) | COI (185) | 12S (18) | OBS                                      |
|--------------------------------------------------------------------|---------------------------|---------|-----------|-------------|-------------|------------|-------------|-----------|-----------|----------|------------------------------------------|
| <i>B. (Psithyrus) cornutus</i> (Frison, 1933)                      | Ningnan, Sichuan, China   | 271     | EF032353  | EF032377    | EF032395    | EF032413   | EF050984    |           |           |          |                                          |
| <i>B. (Psithyrus) flavidus fernaldae</i> (Franklin, 1911)          | New Mexico, USA           | 88      | DQ788006  | AF492926    | AF492993    | AF492859   | EF050969    |           | JX832855  |          | Synonymous of <i>B. flavidus</i>         |
| <i>B. (Psithyrus) flavidus</i> Eversmann, 1852                     | Lappland Co., Sweden      | 41      | DQ788010  | DQ788189    | DQ788332    | DQ788429   | EF050970    |           | AY181184  |          |                                          |
| <i>B. (Psithyrus) insularis</i> (Smith, 1861)                      | California, USA           | 162     | DQ788038  | AF492975    | AF493042    | AF492908   | EF050976    |           | FJ582127  |          |                                          |
|                                                                    |                           |         |           |             |             |            |             |           |           |          | It is renamed to <i>B. (Psithyrus)</i>   |
| <i>B. (Psithyrus) maxillosus</i> Klug, 1817                        | Kayseri Prov., Turkey     | 74      | DQ788054  | DQ788227    | AY739480    | DQ788458   | EF050973    |           |           |          | <i>barbutellus maxillosus</i> Klug, 1817 |
| <i>B. (Psithyrus) norvegicus</i> (Sparre-Schneider, 1918)          | Dalarna Co., Sweden       | 89      | DQ788072  | DQ788246    | DQ788354    | DQ788474   | EF050971    | AF066964  | KJ838809  |          |                                          |
| <i>B. (Psithyrus) quadricolor</i> (Lepeletier, 1832)               | Uppland Co., Sweden       | 90      | DQ788090  | DQ788263    | DQ788363    | DQ788488   | EF050966    |           | HQ563809  |          |                                          |
| <i>B. (Psithyrus) rupestris</i> (Fabricius, 1793)                  | Uppland Co., Sweden       | 9       | DQ788099  | AF492928    | AF492995    | AF492861   | EF050983    |           | KJ839543  |          |                                          |
| <i>B. (Psithyrus) skorikovi</i> (Popov, 1927)                      | Aba, Sichuan, China       | 159     | DQ788106  | DQ788276    | DQ788373    | DQ788499   | EF050968    |           |           |          |                                          |
| <i>B. (Psithyrus) suckleyi</i> Greene, 1860                        | Colorado, USA             | 91      | DQ788110  | DQ788282    | DQ788374    | DQ788503   | EF050981    |           |           |          |                                          |
| <i>B. (Psithyrus) sylvestris</i> (Lepeletier, 1832)                | Uppland Co., Sweden       | 20      | DQ788115  | DQ788286    | DQ788377    | DQ788507   | EF050967    | KT164644  | KJ839213  |          |                                          |
| <i>B. (Psithyrus) tibetanus</i> (Morawitz, 1887)                   | Min Shan, Sichuan, China  | 134     | DQ788120  | DQ788290    | DQ788378    | DQ788509   | EF050985    |           |           |          |                                          |
| <i>B. (Psithyrus) turneri</i> (Richards, 1929)                     |                           | B09     |           |             |             |            |             |           | GU085208  |          |                                          |
| <i>B. (Psithyrus) variabilis</i> (Cresson, 1872)                   | Missouri, USA             | 316     | AY268419  | DQ788295    | AY268397    | DQ788513   | EF050977    |           |           |          | Synonymous of <i>B. intrudens</i>        |
| <i>B. (Psithyrus) vestalis</i> (Geoffroy, 1785)                    | Kent, England             | 169     | DQ788128  | DQ788297    | AY739495    | DQ788515   | EF050980    | JQ820905  | KJ839596  |          |                                          |
| <i>B. (Psithyrus) vestalis perezii</i> (Schulthess-Rechberg, 1886) |                           | Pere19  |           | JQ820977    |             |            | JQ821182    | JQ820772  | JQ820571  |          |                                          |
| <i>B. (Pyrobombus) jonellus alboanalis</i> Franklin, 1913          | Alaska, USA               | 257     | EF032343  | EF032360    | EF032380    | EF032398   | EF050813    |           |           |          | Synonymous of <i>B. jonellus</i>         |
| <i>B. (Pyrobombus) ardens</i> Smith, 1879                          | Dae-Dong, S. Korea        | 131     | DQ787966  | DQ788149    | AF493031    | AF492897   | EF050823    |           | FJ593628  |          |                                          |
| <i>B. (Pyrobombus) avanus</i> (Skorikov, 1938)                     | Luojishan, Sichuan, China | 272     | EF032344  | EF032365    | EF032384    | EF032402   | EF050830    |           |           |          |                                          |
| <i>B. (Pyrobombus) beaticola</i> (Tkalcu, 1968)                    |                           | J5      |           | AF492963    | AF493030    | AF492896   |             |           | AF279532  |          |                                          |
| <i>B. (Pyrobombus) bifarius</i> Cresson, 1878                      | New Mexico, USA           | 208     | DQ787977  | DQ788160    | AF493010    | AF492876   | EF050838    | AF084910  | AF084915  |          |                                          |
| <i>B. (Pyrobombus) bimaculatus</i> Cresson, 1863                   | Arkansas, USA             | 218     | DQ787978  | DQ788161    | AY739456    | DQ788405   | EF050847    |           | KM585629  |          |                                          |
| <i>B. (Pyrobombus) biroii</i> Vogt, 1911                           | Ketmen Mts., Kazakhstan   | 210     | DQ787979  | DQ788162    | AY739457    | DQ788406   | EF050825    |           |           |          |                                          |
| <i>B. (Pyrobombus) brodmannicus</i> Vogt, 1909                     | Artvin Prov., Turkey      | 77      | DQ787984  | DQ788166    | AY739458    | DQ788409   | EF050818    |           | KP033346  |          |                                          |
| <i>B. (Pyrobombus) caliginosus</i> (Frison, 1927)                  | California, USA           | 150     | DQ787985  | DQ788168    | AF493035    | AF492901   | EF050853    |           |           |          |                                          |
| <i>B. (Pyrobombus) centralis</i> Cresson, 1864                     | Washington, USA           | 146     | DQ787987  | DQ788169    | AY739459    | DQ788411   | EF050852    |           | KR875595  |          |                                          |

| Species                                              | Collection locality         | Voucher | 16S (245) | EF-1α (254) | Opsin (240) | ArgK (238) | PEPCK (247) | CytB (80) | COI (185) | 12S (18) | OBS                                            |
|------------------------------------------------------|-----------------------------|---------|-----------|-------------|-------------|------------|-------------|-----------|-----------|----------|------------------------------------------------|
| <i>B. (Pyrobombus) cingulatus</i> Wahlberg, 1854     | Lappi, Finland              | 212     | DQ787989  | AF492948    | AF493015    | AF492881   | EF050812    |           | AF385814  |          |                                                |
| <i>B. (Pyrobombus) ephippiatus</i> Say, 1837         | Chiapas, Mexico             | 198     | DQ788002  | DQ788182    | AY739462    | DQ788422   | EF050844    |           | JF799015  |          |                                                |
| <i>B. (Pyrobombus) flavescens</i> Smith, 1852        | Mei-fang, Taiwan            | 181     | DQ788009  | AF492950    | AF493017    | AF492883   | EF050824    |           | GU085209  |          |                                                |
| <i>B. (Pyrobombus) flavifrons</i> Cresson, 1863      | California, USA             | 95      | DQ788011  | DQ788190    | AF493016    | AF492882   | EF050850    | AF084912  | JX832113  |          |                                                |
| <i>B. (Pyrobombus) frigidus</i> Smith, 1854          | Alaska, USA                 | 185     | DQ788014  | DQ788192    | AY739466    | DQ788431   | EF050811    | AF084909  | JX833457  |          |                                                |
| <i>B. (Pyrobombus) haematurus</i> Kriechbaumer, 1870 | Trabzon Prov., Turkey       | 211     | DQ788019  | EF032364    |             |            | EF050829    |           |           |          |                                                |
| <i>B. (Pyrobombus) huntii</i> Greene, 1860           | Washington, USA             | 151     | DQ788027  | DQ788203    | AF493045    | AF492911   | EF050840    |           | JN400357  |          |                                                |
| <i>B. (Pyrobombus) hypnorum</i> (Linnaeus, 1758)     | Klösterle, Austria          | 78      | DQ788029  | DQ788205    | AF493013    | AF492879   | EF050826    | AF066971  | AY181110  |          |                                                |
| <i>B. (Pyrobombus) hypnorum</i> (Linnaeus, 1758)     | Qionglai Sh, Sichuan, China | 207     | EF032359  | EF032363    | EF032383    | EF032401   | EF050827    | EF424423  | AF385815  |          |                                                |
| <i>B. (Pyrobombus) impatiens</i> Cresson, 1863       | Illinois, USA               | 60      | DQ788033  | DQ788209    | AF493009    | AF492875   | EF050842    |           | HQ978604  |          |                                                |
| <i>B. (Pyrobombus) infirmus</i> (Tkalcu, 19368)      | Qionglai Sh, Sichuan, China | 157     | DQ788036  | DQ788212    | AY739471    | DQ788444   | EF050836    |           |           |          |                                                |
| <i>B. (Pyrobombus) infrequens</i> (Tkalcu, 1989)     | Qionglai Sh, Sichuan, China | 140     | DQ788037  | DQ788213    | AY739472    | DQ788445   | EF050831    |           |           |          |                                                |
| <i>B. (Pyrobombus) jonellus</i> (Kirby, 1802)        | Lapland Co., Sweden         | 79      | DQ788039  | DQ788214    | AY739473    | DQ788446   | EF050814    | F066970   | KJ839707  |          |                                                |
| <i>B. (Pyrobombus) lapponicus</i> (Fabricius, 1793)  | Lapland Co., Sweden         | 103     | DQ788046  | DQ788220    | DQ788345    | DQ788452   | EF050845    | AF066969  | KF434333  |          |                                                |
| <i>B. (Pyrobombus) lemniscatus</i> Skorikov, 1912    | Qionglai Sh, Sichuan, China | 161     | DQ788047  | DQ788221    | AY739477    | DQ788453   | EF050834    |           |           |          |                                                |
| <i>B. (Pyrobombus) lepidus</i> Skorikov, 1912        | Qionglai Sh, Sichuan, China | 155     | DQ788048  | DQ788222    | AY739478    | DQ788454   | EF050835    |           |           |          |                                                |
| <i>B. (Pyrobombus) luteipes</i> Richards, 1934       | Pokhara, Nepal              | 195     | DQ788052  |             |             |            |             |           |           |          |                                                |
| <i>B. (Pyrobombus) melanopygus</i> Nylander, 1848    | California, USA             | 215     | DQ788055  | DQ788229    | AF493011    | AF492877   | EF050849    |           | KR876897  |          |                                                |
| <i>B. (Pyrobombus) mixtus</i> Cresson, 1878          | Washington, USA             | 24      | DQ788060  | DQ788234    | AF493014    | AF492880   | EF050816    |           | JX832459  |          |                                                |
|                                                      |                             |         |           |             |             |            |             |           |           |          | It is renamed to <i>B. (Pyrobombus) wangae</i> |
| <i>B. (Pyrobombus) modestus</i> Eversmann, 1852      | Aba, Sichuan, China         | 160     | DQ788063  | DQ788237    | AY739482    | DQ788465   | EF050820    |           | AF279547  |          | Williams et al., 2009                          |
| <i>B. (Pyrobombus) modestus</i> Eversmann, 1852      | S. Altai, Kazakhstan        | 238     | EF032358  | EF032362    | EF032382    | EF032400   | EF050821    | EF406355  | AF279545  |          |                                                |
| <i>B. (Pyrobombus) monticola</i> Smith, 1844         | E. Pyrenees, France         | 176     | DQ788064  | DQ788238    | AY739483    | DQ788466   | EF050848    |           | KF434341  |          |                                                |
| <i>B. (Pyrobombus) parthenius</i> Richards, 1934     | Himachal Pradesh, India     | 241     | DQ788076  | DQ788250    | DQ788357    | DQ788478   | EF050832    |           |           |          |                                                |
| <i>B. (Pyrobombus) perplexus</i> Cresson, 1863       | Ottawa, Canada              | 166     | DQ788079  | DQ788254    | AF493012    | AF492878   | EF050828    |           | FJ582129  |          |                                                |
| <i>B. (Pyrobombus) picipes</i> Richards, 1934        | Qionglai Sh, Sichuan, China | 180     | DQ788082  | DQ788257    | AY739487    | DQ788482   | EF050833    | EF424426  |           |          |                                                |
| <i>B. (Pyrobombus) pratorum</i> (Linnaeus, 1761)     | Klösterle, Austria          | 75      | DQ788087  | AF492966    | AF493033    | AF492899   | EF050819    |           | GU705924  |          |                                                |

| Species                                                          | Collection locality        | Voucher | 16S (245) | EF-1α (254) | Opsin (240) | ArgK (238) | PEPCK (247) | CytB (80) | COI (185)   | 12S (18) | OBS                                          |
|------------------------------------------------------------------|----------------------------|---------|-----------|-------------|-------------|------------|-------------|-----------|-------------|----------|----------------------------------------------|
| <i>B. (Pyrobombus) pressus</i> (Frison, 1935)                    | Uttaranchal, India         | 239     | DQ788088  | EF032368    |             |            | EF050837    |           |             |          |                                              |
| <i>B. (Pyrobombus) pyrenaeus</i> Pérez, 1880                     | Gurgltal, Aust             | 35      | DQ788089  | DQ788262    | AY739488    | DQ788487   | EF050822    |           | KJ837876    |          |                                              |
| <i>B. (Pyrobombus) sandersoni</i> Franklin, 1913                 | Isle au Haut, Maine, USA   | 255     | EF032346  | EF032361    | EF032381    | EF032399   | EF050815    |           | FJ582137    |          |                                              |
| <i>B. (Pyrobombus) sitkensis</i> Nylander, 1848                  | California, USA            | 144     | DQ788105  | DQ788275    | AY739490    | DQ788498   | EF050817    |           |             |          |                                              |
| <i>B. (Pyrobombus) sonani</i> (Frison, 1934)                     |                            | J6      |           | AF492951    | AF493018    | AF492884   |             |           | AF385816    |          | Changed for the <i>B. parthenius species</i> |
| <i>B. (Pyrobombus) lapponicus sylvicola</i> Kirby, 1837          | New Mexico, USA            | 108     | DQ788116  | DQ788287    | AY739493    | DQ788508   | EF050846    |           | JX833556    |          | Mistake in PEPCK                             |
| <i>B. (Pyrobombus) ternarius</i> Say, 1837                       | Nova Scotia, Canada        | 116     | DQ788117  | AF492979    | AF493046    | AF492912   | EF050839    | AF084911  | FJ582149    |          |                                              |
| <i>B. (Pyrobombus) vagans</i> Smith, 1854                        | Wisconsin, US              | 44      | DQ788125  | DQ788293    | DQ788380    | DQ788512   | EF050854    |           | FJ582159    |          |                                              |
| <i>B. (Pyrobombus) vandykei</i> (Frison, 1927)                   | Washington, USA            | 149     | DQ788126  | DQ788294    | AF493049    | AF492915   | EF050851    |           | KJ845649    |          |                                              |
| <i>B. (Pyrobombus) vosnesenskii</i> Radoszkowski, 1862           | Washington, USA            | 112     | DQ788133  | DQ788301    | AF493047    | AF492913   | EF050841    |           | JN400358    |          |                                              |
| <i>B. (Pyrobombus) ephippiatus wilmattae</i> Cockerell, 1912     | Chiapas, Mexi              | 199     | DQ788136  | DQ788304    | AY739496    | DQ788521   | EF050843    |           | JF799021    |          | Synonymous of <i>B. ephippiatus</i>          |
| <i>B. (Sibiricobombus) asiaticus</i> Morawitz, 1875              | Himachal Pradesh, Indi     | 249     | DQ787970  | EF032369    | EF032387    | EF032406   | EF050896    |           |             |          |                                              |
| <i>B. (Sibiricobombus) niveatus</i> Kriechbaumer, 1870           | Kayseri Prov., Turkey      | 93      | DQ788070  | DQ788244    | DQ788353    | DQ788472   | EF050893    |           |             |          | It is renamed to <i>B. (Sibiricobombus)</i>  |
| <i>B. (Sibiricobombus) oberti</i> Morawitz, 1883                 | Mt. Kailas, Tibet          | 234     | DQ788073  | DQ788247    | DQ788355    | DQ788475   | EF050898    |           |             |          | <i>semenovi</i> Morawitz, 1887               |
| <i>B. (Sibiricobombus) sibiricus</i> (Fabricius, 1781)           | Khövsgöl Nuur, Mongolia    | 274     | EF032348  | EF032370    | EF032388    | EF032407   | EF050897    | EF424424  | GU085210    |          |                                              |
| <i>B. (Sibiricobombus) sulfureus</i> Friese, 1905                | Kayseri Prov., Turkey      | 64      | DQ788111  | DQ788283    | AY739492    | DQ788504   | EF050895    |           |             |          |                                              |
| <i>B. (Sibiricobombus) niveatus vorticosus</i> Gerstaecker, 1872 | Aksaray Prov., Turkey      | 124     | DQ788132  | DQ788300    | DQ788384    | DQ788518   | EF050894    |           |             |          | Synonymous of <i>B. niveatus</i>             |
| <i>B. (Subterraneobombus) amurensis</i> Radoszkowski, 1862       |                            | COI_5P2 |           |             |             |            |             |           | ASBEE035-08 |          |                                              |
| <i>B. (Subterraneobombus) appositus</i> Cresson, 1878            | Utah, USA                  | 145     | DQ787965  | DQ788148    | DQ788314    | DQ788395   | EF050986    |           | KR873657    |          |                                              |
| <i>B. (Subterraneobombus) borealis</i> Kirby, 1837               | Maine, USA                 | 250     | DQ787981  | AF492976    | AF493043    | AF492909   | EF050987    |           | FJ582105    |          |                                              |
| <i>B. (Subterraneobombus) difficillimus</i> Skorikov, 1912       | Hongyuan, Sichuan, China   | 154     | DQ787998  | DQ788177    | DQ788327    | DQ788417   | EF050990    |           |             |          |                                              |
| <i>B. (Subterraneobombus) distinguendus</i> Morawitz, 1869       | Edesbecka, Finland         | 197     | DQ787999  | DQ788180    | DQ788328    | DQ788420   | EF050988    |           | KJ837828    |          |                                              |
| <i>B. (Subterraneobombus) fragrans</i> (Pallas, 1771)            | Kayseri Prov., Turkey      | 61      | DQ788012  | DQ788191    | DQ788333    | DQ788430   | EF050992    | EF424425  |             |          |                                              |
| <i>B. (Subterraneobombus) melanurus</i> Lepeletier, 1835         | Dzungarskij Alatau, Kazakh | 22      | DQ788056  | DQ788230    | AF492990    | AF492856   | EF050991    | EF434859  | KT334308    |          |                                              |
| <i>B. (Subterraneobombus) mongolensis</i> Williams, 2011         |                            | COI-5P  |           |             |             |            |             |           | ASBEE039-08 |          |                                              |
| <i>B. (Subterraneobombus) personatus</i> Smith, 1879             | Hongyuan, Sichuan, China   | 138     | DQ788081  | DQ788256    | DQ788359    | DQ788481   | EF050993    |           |             |          |                                              |



| Species                                                             | Collection locality           | Voucher   | 16S (245) | EF-1α (254)   | Opsin (240)   | ArgK (238) | PEPCK (247)   | CytB (80) | COI (185) | 12S (18) | OBS                                 |
|---------------------------------------------------------------------|-------------------------------|-----------|-----------|---------------|---------------|------------|---------------|-----------|-----------|----------|-------------------------------------|
| <i>B. (Subterraneobombus) subterraneus</i> (Linnaeus, 1758)         | Uppland Co., Sweden           | 46        | DQ788109  | DQ788281      | AF493027      | AF492893   | EF050989      |           | HQ446456  |          |                                     |
| <i>B. (Thoracobombus) anachoreta</i> (Skorikov, 1914)               |                               | AN00001   |           |               |               |            |               |           | KP671683  |          |                                     |
| <i>[B. (Thoracobombus) applanatus</i> Francoso, <i>et al.</i> 2015] | Bahia, Brazil                 | EF209     |           | KT187912      |               | KT187900   |               |           | KT187877  |          | Synonymous of <i>B. brevivillus</i> |
| <i>B. (Thoracobombus) armeniacus</i> Radoszkowski, 1877             | Kayseri Prov., Turkey         | 80        | DQ787968  | DQ788151      | DQ788315      | DQ788397   | EF050937      |           |           |          |                                     |
| <i>B. (Thoracobombus) atripes</i> Smith, 1852                       | Zhejiang Prov., China         | 66        | DQ787971  | DQ788153      | DQ788316      | DQ788399   | EF050964      |           |           |          |                                     |
|                                                                     |                               |           | in this   |               |               | in this    |               |           |           |          |                                     |
| <i>B. (Thoracobombus) bahiensis</i> Santos-Júnior & Silveira, 2015  | Ilhéus, Bahia, Brazil         | b85 52893 | paper     | in this paper | in this paper | paper      | in this paper | KJ849088  | KJ848944  |          |                                     |
| <i>B. (Thoracobombus) bellicosus</i> Smith, 1879                    | Buenos Aires, Argentina       | 221       | AY268399  | DQ788159      | AY268377      | DQ788404   | EF050956      |           | KT187864  | AF529427 |                                     |
| <i>B. (Thoracobombus) brasiliensis</i> Lepeletier, 1835             | Paraná, Brazil                | 219       | AY268400  | DQ788164      | AY268378      |            | EF050950      | KJ849033  | KJ848884  | AF529428 |                                     |
|                                                                     |                               |           | in this   |               |               | in this    |               |           |           |          |                                     |
| <i>B. (Thoracobombus) brasiliensis</i> Lepeletier, 1835             | Pedregulho, São Paulo, Brazil | 1218400   | paper     | in this paper | in this paper | paper      | in this paper | KJ848974  | KJ848808  |          |                                     |
|                                                                     |                               |           | in this   |               |               | in this    |               |           |           |          |                                     |
| <i>B. (Thoracobombus) brevivillus</i> Franklin, 1913                | Prata, Paraíba, Brazil        | 1200916   | paper     | in this paper | in this paper | paper      | in this paper | KJ849027  | KJ848874  |          |                                     |
|                                                                     |                               |           | in this   |               |               | in this    |               |           |           |          |                                     |
| <i>B. (Thoracobombus) brevivillus</i> Franklin, 1913                | Remígio, Paraíba, Brazil      | 1202754   | paper     | in this paper | in this paper | paper      | in this paper | KJ849028  | KJ848876  |          |                                     |
|                                                                     |                               |           | in this   |               |               | in this    |               | in this   |           |          |                                     |
| <i>B. (Thoracobombus) brevivillus</i> Franklin, 1913                | Ubajara, Ceará, Brazil        | 1207320   | paper     | in this paper | in this paper | paper      | in this paper | paper     | KJ848951  |          |                                     |
|                                                                     |                               |           | in this   |               |               | in this    |               | in this   |           |          |                                     |
| <i>B. (Thoracobombus) brevivillus</i> Franklin, 1913                | Ubajara, Ceará, Brazil        | 1207321   | paper     | in this paper | in this paper | paper      | in this paper | paper     | KJ848952  |          |                                     |
|                                                                     |                               |           | in this   |               |               | in this    |               | in this   |           |          |                                     |
| <i>B. (Thoracobombus) brevivillus</i> Franklin, 1913                | Ubajara, Ceará, Brazil        | 1207210   | paper     | in this paper | in this paper | paper      | in this paper | paper     | KJ848953  |          |                                     |
| <i>B. (Thoracobombus) fervidus californicus</i> (Fabricius, 1798)   | Alberta, Canada               | 306       | AY268401  | DQ788167      | AY268379      | DQ788410   | EF050957      |           |           | AF529429 | Synonymous of <i>B. fervidus</i>    |
| <i>B. (Thoracobombus) dahlbomii</i> Guérin-Ménéville, 1835          | Arauco Prov., Chile           | 16        | DQ787996  | AF492931      | AF492998      | AF492864   | EF050940      | AF066962  | AF066979  | AF529430 |                                     |
| <i>B. (Thoracobombus) deuteronymus</i> Schulz, 1906                 | Primorskiy Krai, Russia       | 147       | DQ787997  | DQ788176      | DQ788326      | AY267170   | EF050922      |           | AF385820  |          |                                     |
| <i>B. (Thoracobombus) digressus</i> (Milliron, 1962)                | R. Grande de Orosí, Mexico    | 307       | AY268403  | DQ788178      | AY268381      | DQ788418   | EF050959      |           |           | AF529431 |                                     |
| <i>B. (Thoracobombus) diligens</i> Smith, 1861                      | Jalisco, Mexico               | 171       | AY268404  | DQ788179      | AY268382      | DQ788419   | EF050955      |           | KC853366  | AF529432 |                                     |
| <i>B. (Thoracobombus) excellens</i> Smith, 1879                     | Aragua, Venezuela             | 308       | AY268405  | DQ788184      | AY268383      | DQ788424   | EF050942      |           | KC853321  | AF529433 |                                     |

| Species                                                         | Collection locality           | Voucher | 16S (245) | EF-1α (254)   | Opsin (240)   | ArgK (238) | PEPCK (247)   | CytB (80) | COI (185) | 12S (18) | OBS                                           |
|-----------------------------------------------------------------|-------------------------------|---------|-----------|---------------|---------------|------------|---------------|-----------|-----------|----------|-----------------------------------------------|
| <i>B. (Thoracobombus) exil</i> (Skorikov, 1823)                 | Hövsögöl Nuur, Mongolia       | 232     | DQ788004  | DQ788185      | DQ788330      | DQ788425   | EF050962      |           |           |          |                                               |
| <i>B. (Thoracobombus) fervidus</i> (Fabricius, 1798)            | Missouri, USA                 | 309     | AY268406  | AF492930      | AF492997      | AF492863   | EF050958      |           | FJ582122  | AF529434 |                                               |
| <i>B. (Thoracobombus) filchnerae</i> Vogt, 1908                 | Hongyuan, Sichuan, China      | 206     | DQ788008  | DQ788188      | DQ788331      | DQ788428   | EF050933      | EF406353  | KF468688  |          |                                               |
| <i>B. (Thoracobombus) hedini</i> Bischoff, 1936                 | Qionglai Sh, Sichuan, China   | 129     | DQ788023  | DQ788199      | DQ788338      | DQ788437   | EF050930      | EF406354  |           |          |                                               |
| <i>B. (Thoracobombus) honshuensis</i> (Tkalcu, 1968)            |                               | J7      |           | AF492962      | AF493029      | AF492895   |               |           | AF279559  |          |                                               |
| <i>B. (Thoracobombus) humilis</i> Illiger, 1806                 | E. Pyrenees, France           | 56      | DQ788026  | DQ788202      | AY739469      | DQ788439   | EF050924      | AF017517  | KJ839745  |          |                                               |
| <i>B. (Thoracobombus) imitator</i> Pittioni, 1949               | Guizhou Prov., China          | 28      | DQ788032  | DQ788208      | DQ788339      | DQ788441   | EF050965      |           |           |          |                                               |
| <i>B. (Thoracobombus) impetuus</i> Smith, 1871                  | Xinmian, Sichuan, China       | 284     | EF032350  | EF032373      | EF032391      | EF032409   | EF050927      |           |           |          |                                               |
| <i>B. (Thoracobombus) inexpectatus</i> (Tkalcu, 1963)           |                               | B05     | FJ159110  | FJ159108      | FJ159109      | FJ159107   | FJ159106      |           |           |          |                                               |
| <i>B. (Thoracobombus) laesus</i> Morawitz, 1875                 | Kars Prov., Turkey            | 52      | DQ788044  | DQ788218      | DQ788344      | DQ788451   | EF050936      |           | KP671682  |          |                                               |
| <i>B. (Thoracobombus) medius</i> Cresson, 1863                  | Chiapas, Mexico               | 222     | AY268407  | DQ788228      | AY268385      | DQ788459   | EF050951      |           | KC853364  |          |                                               |
| <i>B. (Thoracobombus) mesomelas</i> Gerstaecker, 1869           | Switzerland                   | 37      | DQ788058  | DQ788231      | EF032390      | EF032414   | EF050938      | AF066963  | KJ839160  |          |                                               |
| <i>B. (Thoracobombus) mexicanus</i> Cresson, 1878               | Chiapas, Mexico               | 220     | AY268408  | DQ788232      | AY268386      | DQ788461   | EF050952      |           | KC853372  |          |                                               |
| <i>B. (Thoracobombus) mlokosievtzii</i> Radoskowski, 1877       | Artvin Prov., Turkey          | 81      | DQ788061  | DQ788235      | DQ788349      | DQ788463   | EF050917      |           |           |          |                                               |
| <i>B. (Thoracobombus) morio</i> (Swederus, 1787)                | Porto Alegre, Brazil          | 310     | AY268409  | DQ788239      | AY268387      | DQ788467   | EF050941      | KJ848968  | KJ848802  | AF529435 |                                               |
|                                                                 |                               |         | in this   |               |               | in this    |               |           |           |          |                                               |
| <i>B. (Thoracobombus) morio</i> (Swederus, 1787)                | Catalão, Goiás, Brazil        | b13     | paper     | in this paper | in this paper | paper      | in this paper | KJ848979  | KJ848813  |          |                                               |
| <i>B. (Thoracobombus) mucidus</i> Gerstaecker, 1869             | E. Pyrenees, France           | 59      | DQ788066  | AF492935      | AF493002      | AF492868   | EF050934      |           | KJ839017  |          |                                               |
| <i>B. (Thoracobombus) muscorum</i> (Linnaeus, 1758)             | Öland Co., Sweden             | 33      | DQ788067  | DQ788241      | DQ788351      | DQ788469   | EF050925      |           | AY181133  | AF529442 |                                               |
| <i>B. (Thoracobombus) muscorum pereziellus</i> (Skorikov, 1923) |                               | Per101  |           | KF468702      |               |            |               |           | KF468695  |          |                                               |
| <i>B. (Thoracobombus) opifex</i> Smith, 1879                    | Puno, Peru                    | 175     | DQ788075  | DQ788249      | DQ788356      | DQ788477   | EF050954      |           | KC853365  |          |                                               |
|                                                                 |                               |         |           |               |               |            |               |           |           |          | Mistake in table of Cameron et al. 2007       |
| <i>B. (Thoracobombus) pascuorum</i> (Scopoli, 1763)             | Toscana, Italy                | 23      | DQ788077  | DQ788251      | AF493001      | AF492867   | EF050932      | EU122104  | GU705929  | AF529443 | (Argk )                                       |
| <i>B. (Thoracobombus) pauloensis</i> Friese, 1913               | Ribeirão Preto, Brazil        | 305     | AY268398  | DQ788152      | AY268376      | DQ788398   | EF050943      | KJ849067  | KJ848921  | AF529426 | Is like <i>B. atratus</i> Cameron et al. 2007 |
|                                                                 |                               |         | in this   |               |               |            |               | in this   |           |          |                                               |
| <i>B. (Thoracobombus) pauloensis</i> Friese, 1913               | Salinas, Minas Gerais, Brazil | 77202   | paper     | in this paper | in this paper |            | in this paper | paper     | KJ848786  |          |                                               |
| <i>B. (Thoracobombus) pennsylvanicus</i> (DeGeer, 1773)         | Missouri, USA                 | 317     | EF032352  | EF032374      | EF032392      | EF032411   | EF050948      | AF181611  | KC853361  | AF529436 |                                               |

| Species                                                      | Collection locality         | Voucher    | 16S (245) | EF-1α (254) | Opsin (240) | ArgK (238) | PEPCK (247) | CytB (80) | COI (185) | 12S (18)  | OBS                                    |
|--------------------------------------------------------------|-----------------------------|------------|-----------|-------------|-------------|------------|-------------|-----------|-----------|-----------|----------------------------------------|
| <i>B. (Thoracobombus) pennsylvanicus</i> (DeGeer, 1773)      | Missouri, USA               | 311        | EF032351  | EF032375    | EF032393    | EF032412   | EF050949    |           |           |           |                                        |
| <i>B. (Thoracobombus) persicus</i> Radoszkowski, 1881        | Kars Prov., Turkey          | 54         | DQ788080  | DQ788255    | DQ788358    | DQ788480   | EF050935    |           |           |           |                                        |
| <i>B. (Thoracobombus) pomorum</i> (Panzer, 1805)             | Erzincan Prov., Turkey      | 53         | DQ788084  | DQ788258    | DQ788360    | DQ788483   | EF050939    |           |           |           |                                        |
| <i>B. (Thoracobombus) impetuosus potanini</i> Morawitz, 1890 | Hongyuan, Sichuan, China    | 113        | DQ788086  | DQ788260    | DQ788362    | DQ788485   | EF050928    |           |           |           | Synonymous of <i>B. impetuosus</i>     |
| <i>B. (Thoracobombus) pseudobaicalensis</i> Vogt, 1911       | Primorskiy Kray, Russia     | 253        | EF032357  | EF032372    | AY267155    | AY267171   | EF050923    | EU110101  | AF279564  |           |                                        |
| <i>B. (Thoracobombus) pullatus</i> Franklin, 1913            | Pitilla, Costa Rica         | 312        | AY268411  | DQ788261    | AY268389    | DQ788486   | EF050945    | AF066961  | AF066978  | AF529437  |                                        |
| <i>B. (Thoracobombus) remotus</i> (Tkalcu, 1968)             | Qionglai Sh, Sichuan, China | 192        | DQ788092  | DQ788265    | DQ788365    | DQ788490   | EF050929    |           |           |           |                                        |
| <i>B. (Thoracobombus) ruderarius</i> (Müller, 1776)          | Obergurgl, Austria          | 47         | DQ788095  | AF492932    | AF492999    | AF492865   | EF050920    | AF002723  | KJ838913  |           |                                        |
| <i>B. (Thoracobombus) schrencki</i> Morawitz, 1881           | W. Khentey, N. Mongolia     | 298        | AF364828  | AF492933    | AF493000    | AF492866   | EF050931    |           | GU674500  |           |                                        |
| <i>B. (Thoracobombus) pennsylvanicus sonorus</i> Say, 1837   | Arizona, USA                | 51         | DQ822475  | DQ788277    | EF032394    | DQ788500   | EF050946    |           |           |           | Synonymous of <i>B. pennsylvanicus</i> |
| <i>B. (Thoracobombus) pennsylvanicus sonorus</i> Say, 1837   | Mexico                      | 318        | AY268412  | EF032376    | AY268390    | EF032410   | EF050947    |           |           | AF529438  | Synonymous of <i>B. pennsylvanicus</i> |
| <i>B. (Thoracobombus) steindachneri</i> Handlirsch, 1888     | Morelos, Mexico             | 313        | AY268413  | DQ788280    | AY268391    | DQ788502   | EF050953    |           |           | AF529439  |                                        |
| <i>B. (Thoracobombus) sylvarum</i> (Linnaeus, 1761)          | Uppsala Co., Sweden         | 110        | DQ788114  | DQ788285    | DQ788376    | DQ788506   | EF050918    |           | KJ839388  |           |                                        |
| <i>B. (Thoracobombus) transversalis</i> (Olivier, 1789)      | Madre de Dios, Peru         | 314        | AY268414  | DQ788291    | AY268392    | DQ788510   | EF050944    | KJ849091  | KJ848950  | AF529440  |                                        |
| <i>B. (Thoracobombus) tricornis</i> Radoszkowski, 1888       | Primorskiy Kray, Russia     | 148        | DQ788121  | AF492937    | AF493004    | AF492870   | EF050963    |           | AF279573  |           |                                        |
| <i>B. (Thoracobombus) trinominatus</i> Dalla Torre, 1890     | Oaxaca, Mexico              | 229        | DQ788123  | DQ788292    | DQ788379    | DQ788511   | EF050960    |           |           |           |                                        |
| <i>B. (Thoracobombus) velox</i> (Skorikov, 1914)             | Artvin Prov., Turkey        | 94         | DQ788127  | DQ788296    | DQ788381    | DQ788514   | EF050921    |           |           |           |                                        |
| <i>B. (Thoracobombus) veteranus</i> (Fabricius, 1793)        | Jura, France                | 187        | DQ788129  | DQ788298    | DQ788382    | DQ788516   | EF050919    |           | HQ563800  |           |                                        |
| <i>B. (Thoracobombus) weisi</i> Friese, 1903                 | Jalisco, Mexico             | 315        | AY268415  | DQ788303    | AY268393    | DQ788520   | EF050961    |           | KC853373  | AF529441  |                                        |
| <i>B. (Thoracobombus) zonatus</i> Smith, 1854                | Aksaray Prov., Turkey       | 63         | DQ788138  | DQ788306    | DQ788386    | DQ788522   | EF050926    |           |           |           |                                        |
| <i>Apis dorsata</i> Fabricius, 1793                          | Bangalore, India            | 321        | L22893    | AY267146    | AF091733    | AY267178   | EF051028    | KP259252  | KJ513470  | KC294229  |                                        |
| <i>Apis mellifera</i> Linnaeus, 1758                         | Arkansas, USA               | 320        | L22891    | AF015267    | AF091732    | EF032397   | EF051030    | EF184045  | KP844947  | KM458618  |                                        |
| <i>Apis cerana</i> Fabricius, 1793                           |                             | isolate_63 | HQ318940  | EU184774    | EU184839    | EU184832   |             | AP017314  | KJ755628  | NC_014295 |                                        |
| <i>Euglossa (Glossura) imperialis</i> Cockerell, 1922        | São Paulo, Brazil           | 319        | AJ581085  | AY267144    | AY267160    | AY267176   |             | AY916117  | AJ581106  |           |                                        |
| <i>Euglossa (Euglossa) championi</i> Cheesman, 1929          |                             | EU16       | AJ581089  | EU421368    | AJ581740    | EU421629   |             |           | EU421497  |           |                                        |
| <i>Eulaema (Apeulaema) boliviensis</i> Friese, 1898          | La Paz Prov., Bolivia       | 213        | DQ788139  | DQ788307    | DQ788387    | DQ788523   | EF051029    |           | EU421493  |           |                                        |
| <i>Eulaema (Apeulaema) nigrita</i> Lepeletier, 1841          |                             | EU7        | AJ581097  | EU421427    | AJ581732    | EU421685   |             | AY916095  | EU421555  |           |                                        |

| Species                                             | Collection locality         | Voucher | 16S (245) | EF-1 $\alpha$ (254) | Opsin (240) | ArgK (238) | PEPCK (247) | CytB (80) | COI (185) | 12S (18) | OBS |
|-----------------------------------------------------|-----------------------------|---------|-----------|---------------------|-------------|------------|-------------|-----------|-----------|----------|-----|
| <i>Eufriesea pulchra</i> (Smith, 1854)              |                             | DWR-F24 |           | EU184769            | EU184834    | EU184828   |             |           | AY506359  |          |     |
| <i>Eufriesea surinamensis</i> (Linnaeus, 1758)      |                             | EU25    |           | EU421379            | GU245272    | EU421639   |             |           | EU421508  |          |     |
| <i>Geniotrigona thoracica</i> (Smith, 1857)         | Kuala Muda, Malaysia        | 303     | DQ788140  | DQ788308            | DQ788388    | DQ788524   | EF051023    |           |           |          |     |
| <i>Heterotrigona itama</i> (Cockerell, 1918)        | Kuala Muda, Malaysia        | 304     | DQ788141  | DQ788309            | DQ788389    | DQ788525   | EF051024    |           |           |          |     |
| <i>Hypotrigona gribodoi</i> (Magretti, 1884)        | Bwindi, Uganda              | 322     | DQ790440  | DQ813121            | DQ813199    | DQ813043   | EF051026    |           |           |          |     |
| <i>Liotrigona mahafalya</i> Brooks & Michener, 1988 | Mahajanga Prov., Madagascar | J8      | DQ790442  | DQ813126            | DQ813204    | DQ813048   |             |           | HQ012811  |          |     |
| <i>Plebeia frontalis</i> (Fries, 1911)              | Puebla, Mexico              | 323     | DQ790459  | DQ813138            | DQ813216    | DQ813059   | EF051027    |           |           |          |     |
| <i>Trigona amazonensis</i> (Ducke, 1916)            | Madre de Dios, Peru         | 178     | DQ788142  | DQ788310            | DQ788390    | DQ788526   | EF051025    |           |           |          |     |
