# Supplementary material for: Biogeography and Diversification of Bumblebees (Hymenoptera: Apidae), with Emphasis on Neotropical Species
Source: MDPI journal article supplement (doi:10.3390/d14040238), 2022-03-25
Supplement: s1 [file s1]

**Table S3.** PCR primer pairs and annealing temperatures used for analysis. See

Supplementary Table S2 for primer sequences used.

| Gene         | Primers                         | Temperature | Product size |
|--------------|---------------------------------|-------------|--------------|
| COI          | LepF1 + COI_R_PR3               | 50°C        | ~888pb       |
|              | LepF1 + mtd_9                   | 50°C        | ~729pb       |
|              | LepF1 + LepR1                   | 50°C        | ~711pb       |
|              | mtd_6 + COI_R_PR3               | 50°C        | ~686pb       |
|              | mtd_6 + mtd_9                   | 50°C        | ~527pb       |
|              | mtd_26 + MBI_30                 | 50°C        | ~1100pb      |
| CytB         | LR13943F+874                    | 50°C        | ~500pb       |
| 16S          | LWRhF + LWRhR                   | 57°C        | ~700pb       |
| EF1 $\alpha$ | EF1 $\alpha$ F + EF1 $\alpha$ R | 53°C        | ~1200pb      |
| Argk         | ArgkF1 + ArgkR1                 | 50°C        | ~700pb       |
| PEPCK        | FHv4 + RHv4                     | 50°C        | ~900pb       |
