# Supplementary material for: Biogeography and Diversification of Bumblebees (Hymenoptera: Apidae), with Emphasis on Neotropical Species
Source: MDPI journal article supplement (doi:10.3390/d14040238), 2022-03-25
Supplement: s1 [file s1]

## S1. Methods and results of maximum parsimony (MP) and maximum likelihood (ML) analyses

### S1.1. Methods

We used TNT [1] for maximum parsimony (MP) analyses. Two independent MP analyses were made:

1) the first inference was performed using a heuristic search with 1,000 replications (saving at most 100 trees in each replication) of random (stepwise) addition of taxa followed by Tree Bisection Reconnection (TBR) branch swapping. Two additional runs using trees on memory were performed to refine searches. To evaluate branch support we made 10,000 replicates of standard bootstrap.

2) the second inference was performed using new technology search (NTS) with sectorial search, ratchet, tree-drifting and tree fusing options and 10 random addition sequences (saving at most 100 trees in each replication). Trees resulting from such analyses were submitted to an additional round of TBR. To evaluate branch support in the resulting trees, we made 10,000 replicates of standard bootstrap.

A maximum likelihood analysis (ML) was performed in RAxML version 8 [2]. The model GTR+G was used for all partitions obtained with PartitionFinder v.2.1.1 [3] and 1,000 bootstrap replicates search were used to calculate branch support (ML optimizations were performed every five bootstrap replicates and were followed by a final search for the best-scoring ML tree once bootstrap search was over). We also used the program IQ-TREE [4] for an alternative ML analysis, which differs from RAxML by using flexible models' definitions and a fast bootstrap approximation with algorithm UFBoot2 [5].

### S1.2. Results

The best scores of MP were 13,176 and 14,493 for the analyses without NTS and with NTS, respectively (total rearrangements examined 21,224,652,872 and 21,145,970,952; Figures S7 and S8). The subgenera *Alpigenobombus*, *Melanobombus*, *Sibiricobombus* and *Cullumanobombus* arised in a polytomy, where *B. (Melanobombus) festivus* and *B. (Melanobombus) eximius* grouped with *Sibiricobombus*, making *Melanobombus* paraphyletic. In the MP analyses *Thoracobombus* is paraphyletic, *B. laesus* grouped with *Psithirus* (Figure S7). The ML tree obtained with RaxML recovered *B. rufocinctus* as part of a polytomy, leaving the subgenera *Cullumanobombus* paraphyletic. The polytomy was composed of *Cullumanobombus* + *Sibiricobombus* + *B. (Cullumanobombus) rufocinctus* (Figure S9).

All subgenera were monophyletic in ML analyses obtained with IQ-TREE, although some of them were supported by low bootstrap values. The relationships among species within some subgenera were not well resolved or were weakly supported (Figure S10).

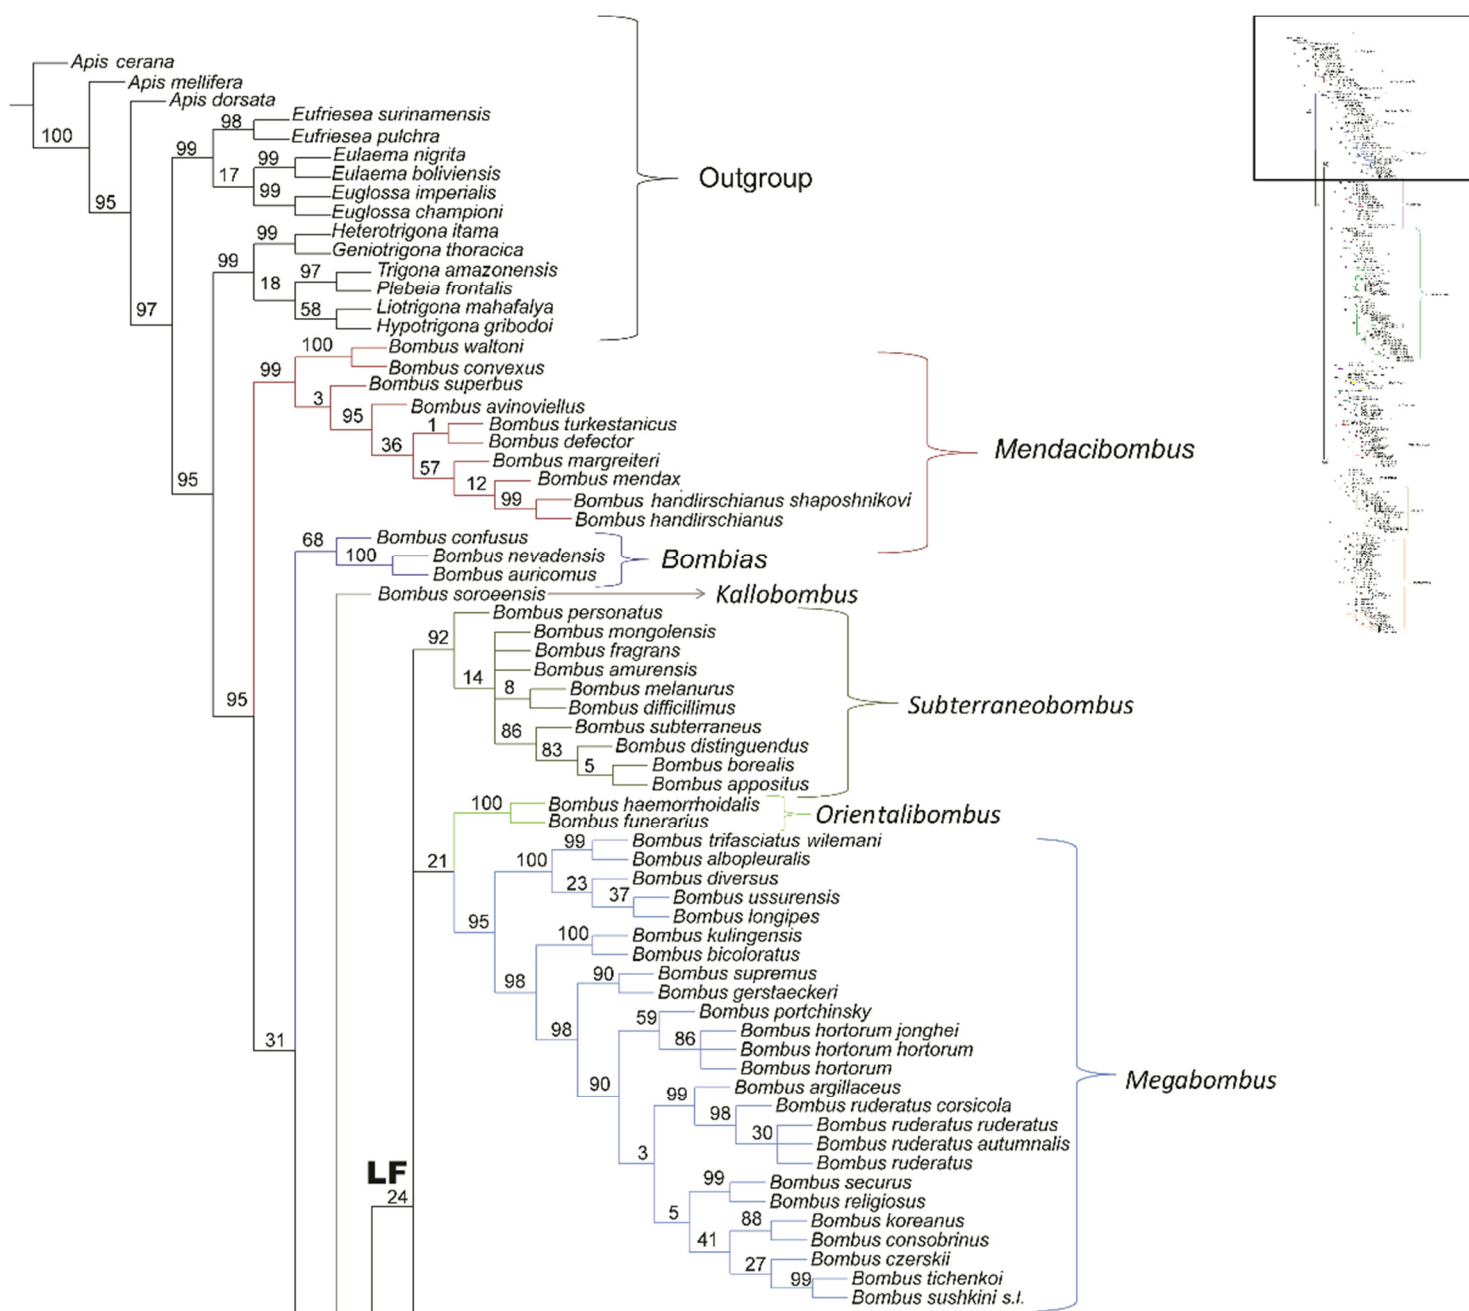

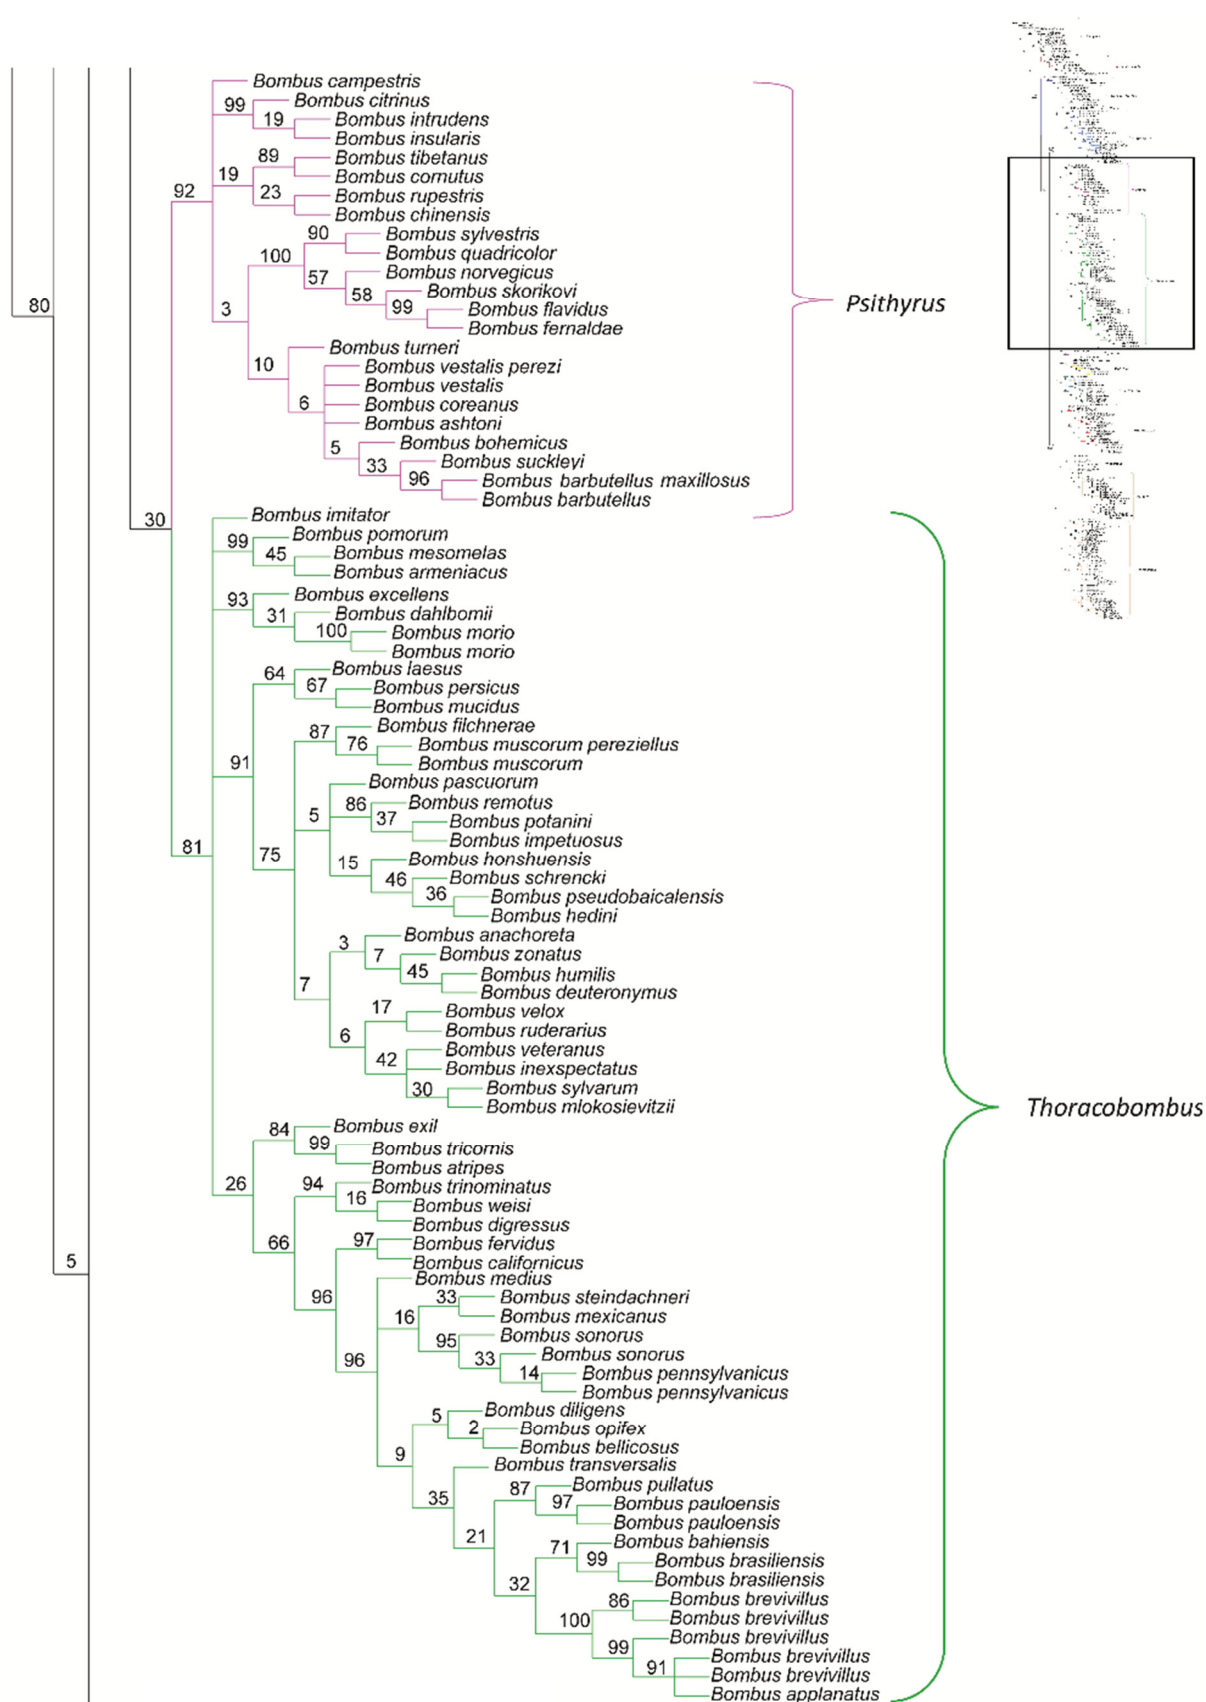

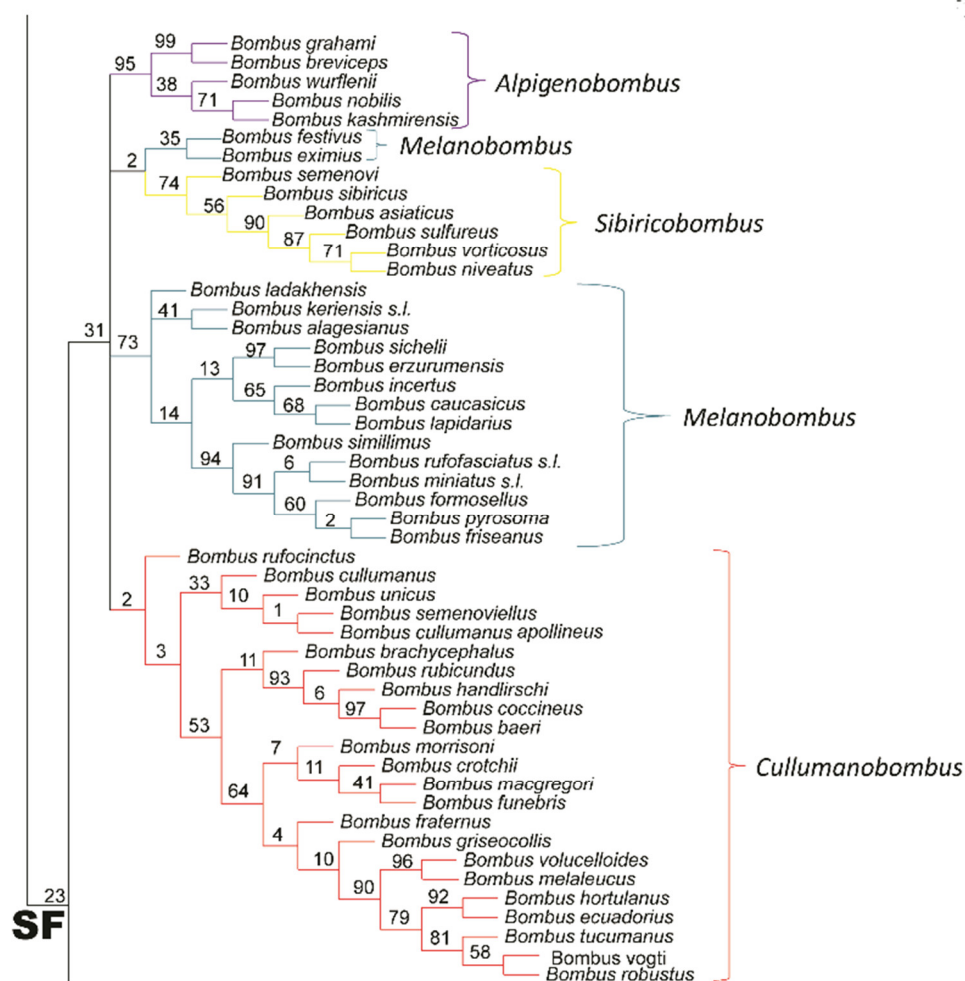

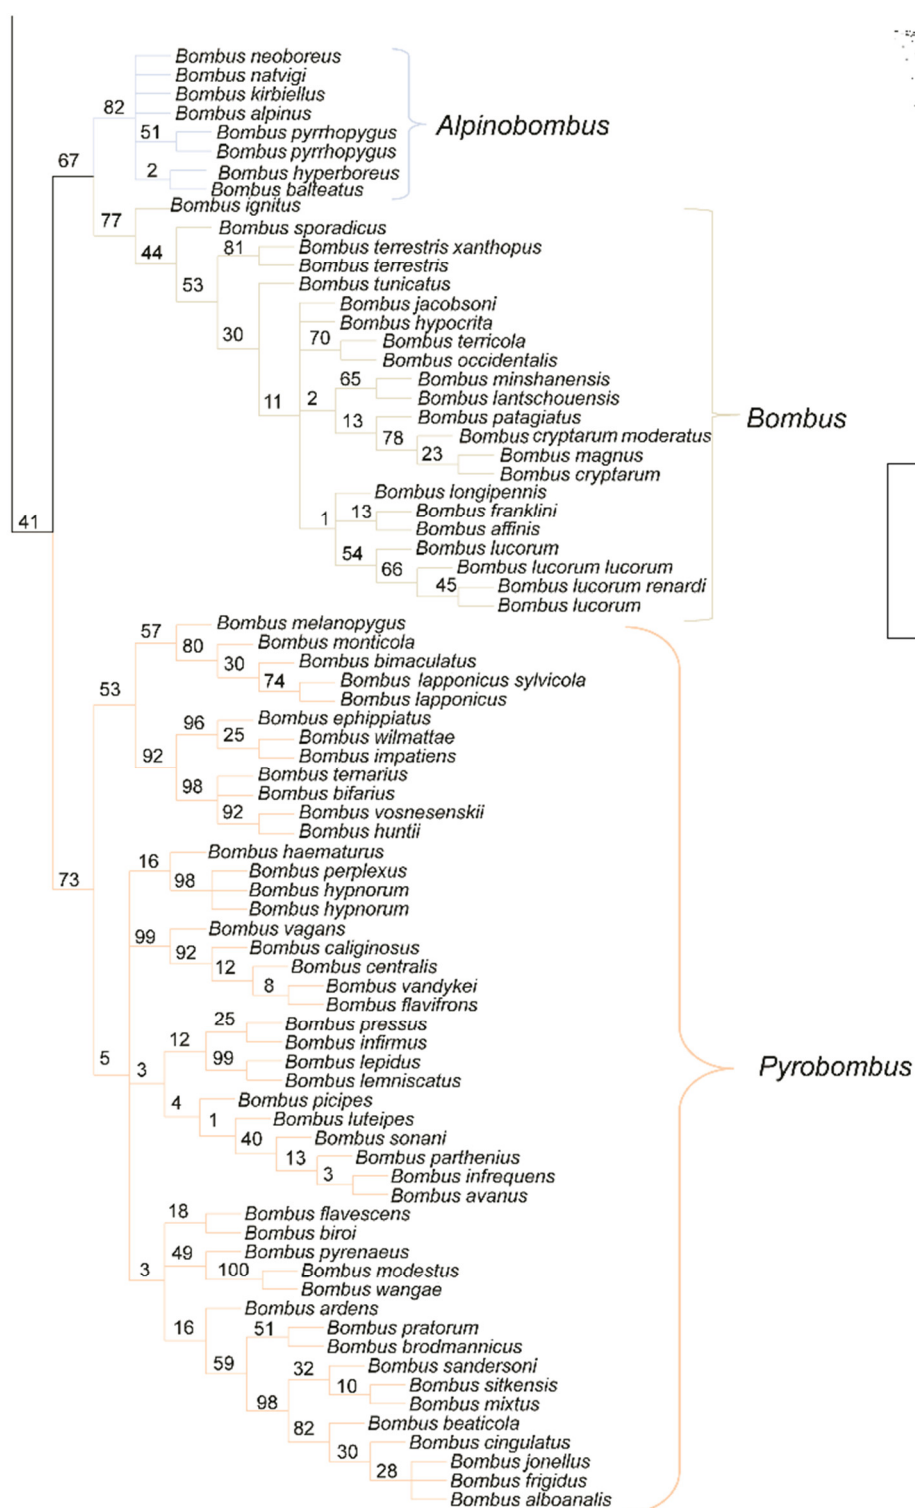

**Figure S7.** Strict consensus tree of Maximum Parsimony – MP analysis of bumblebees' species. Topologies recovered with the data of matrix presented in Table S5. The values shown above each branch are bootstrap values. Tree performed using a heuristic search with 1000 replications (saving at most 100 trees in each replication) of random (stepwise) addition of taxa followed by Tree Bisection Reconnection (TBR) branch swapping. Two additional runs using trees on memory were performed to refine searches. To evaluate branch supports we made 10,000 replicates of standard bootstrap. Sister groups of the long-faced (LF) and short-faced (SF) bumblebees were shown.

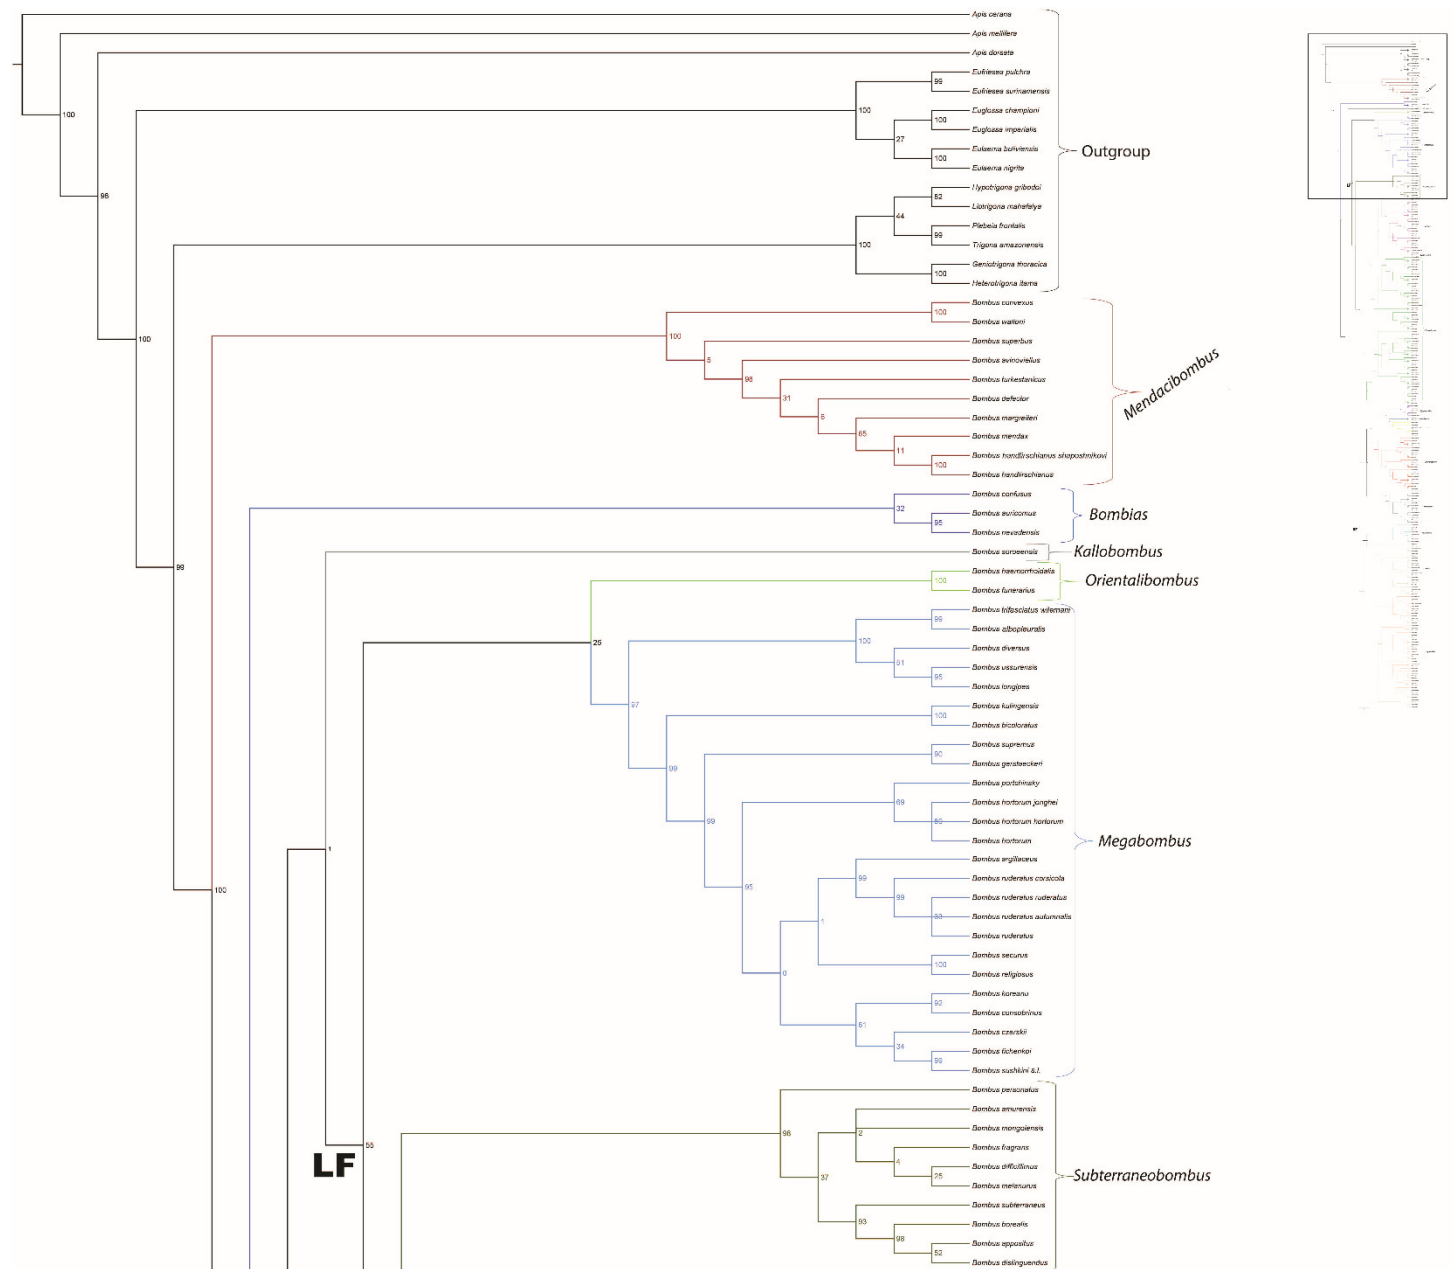



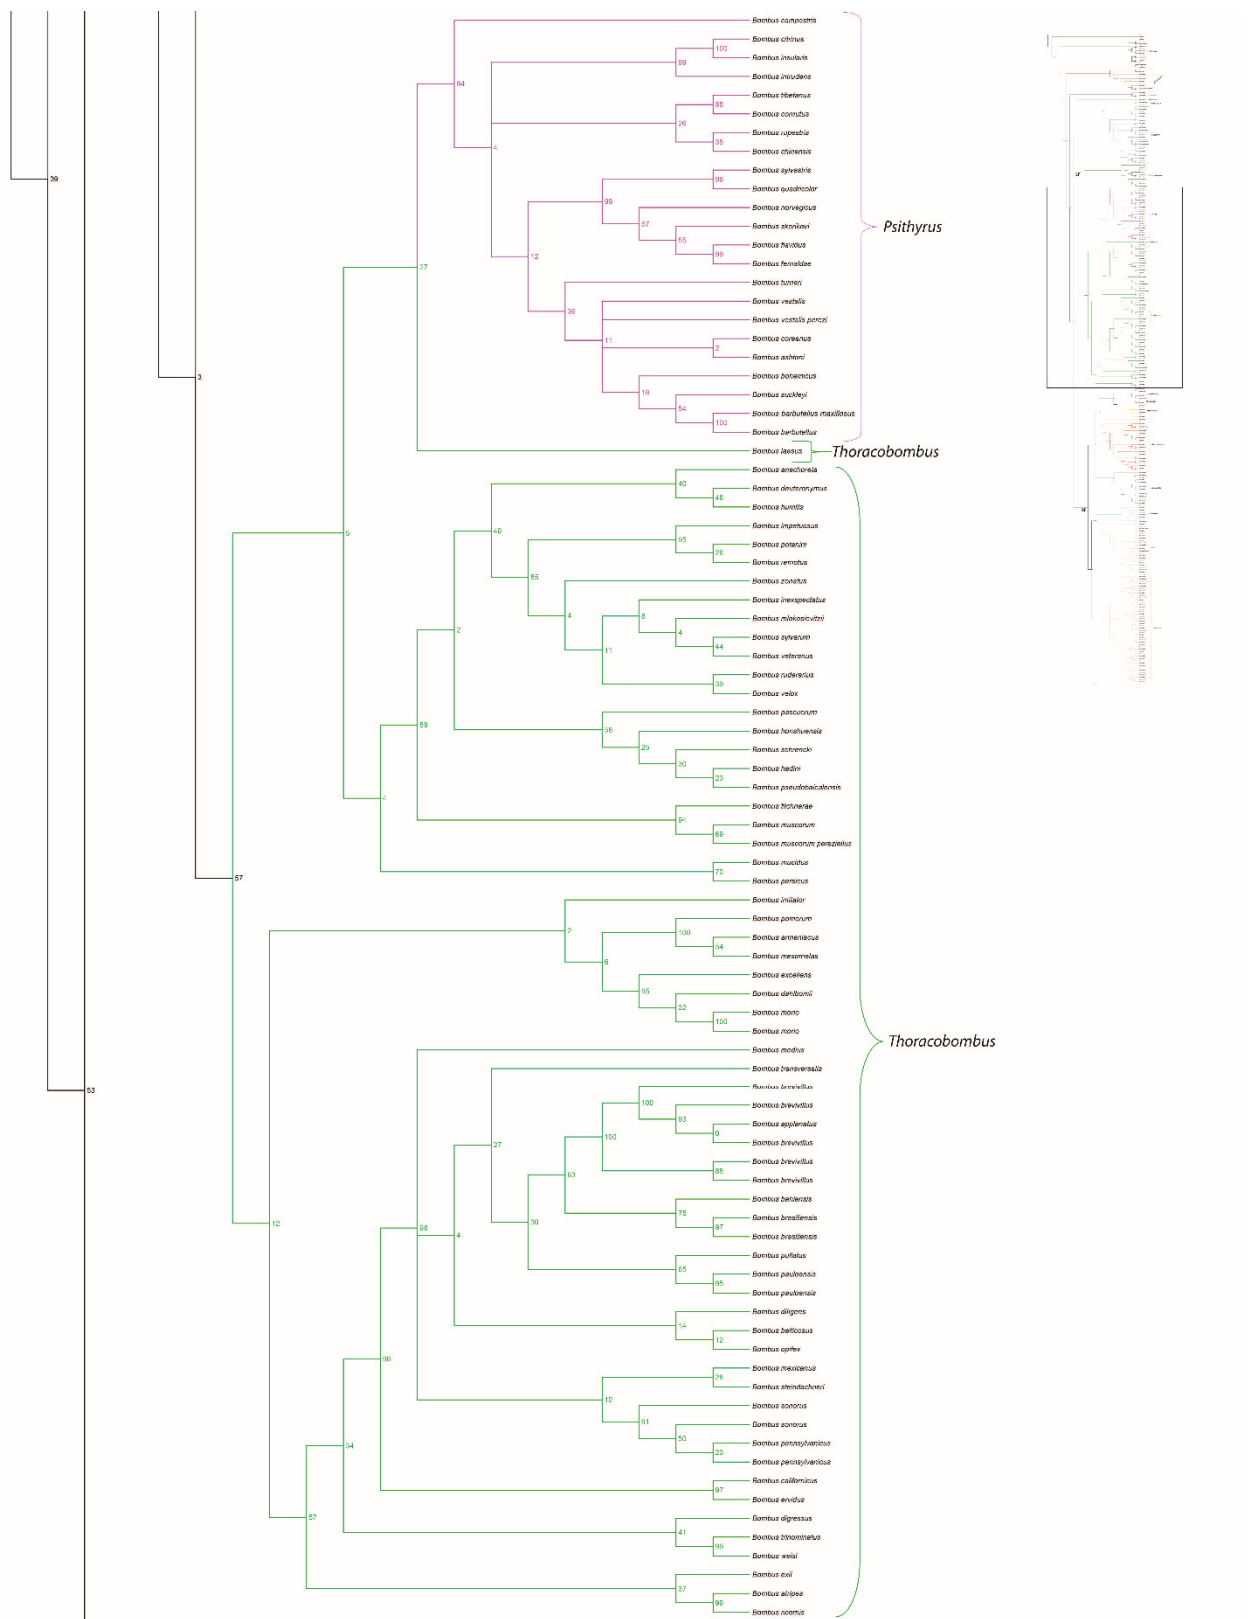

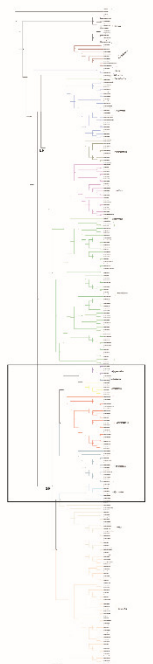



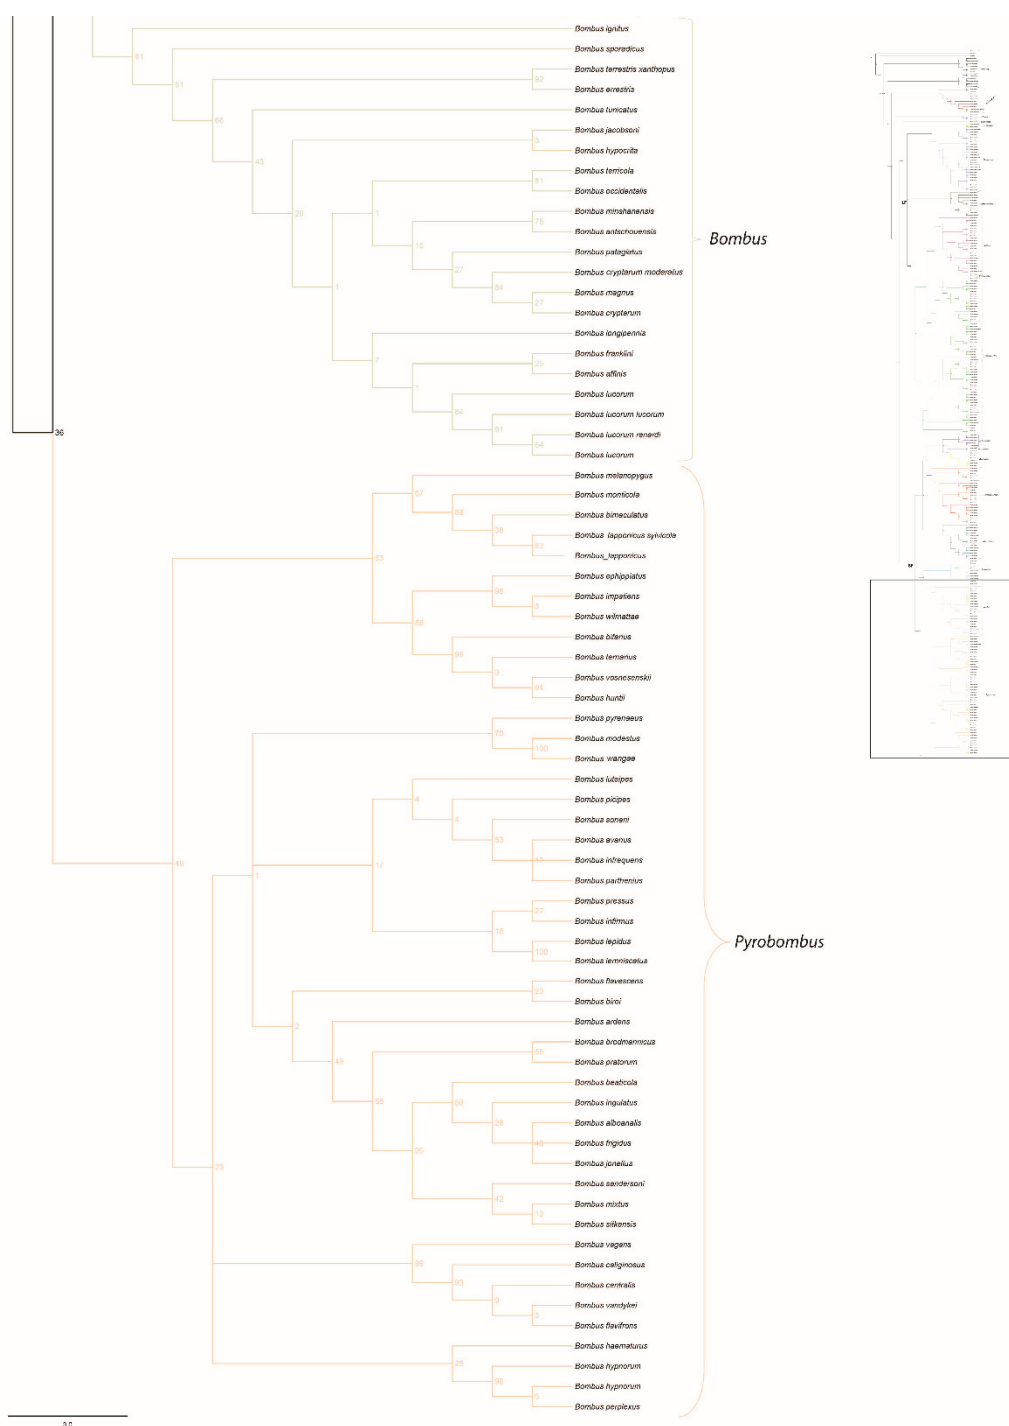

**Figure S8.** Strict consensus tree of Maximum Parsimony – MP analysis of bumblebees' species. Topologies recovered with the data of matrix presented in Table S5. The values shown around each branch are bootstrap values. Tree performed using new technology search (NTS) with sectorial search, ratchet, drift and tree fusing options and 10 random addition sequences (saving at most 100 trees in each replication). After analysis with the new technology search were used a round of Tree Bisection Reconnection (TBR). To evaluate branch supports we made 10,000 replicates of standard bootstrap. Sister groups of the long-faced (LF) and short-faced (SF) bumblebees were shown.

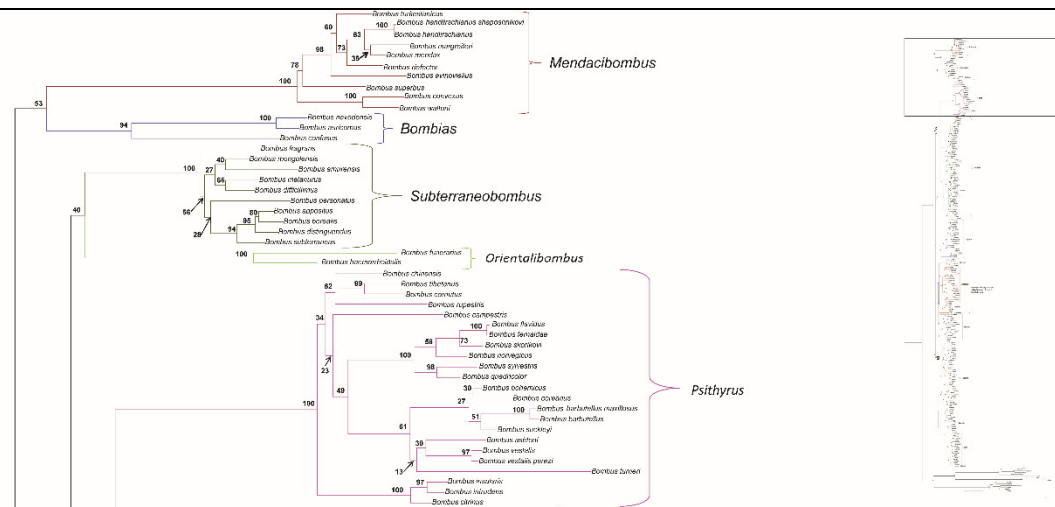

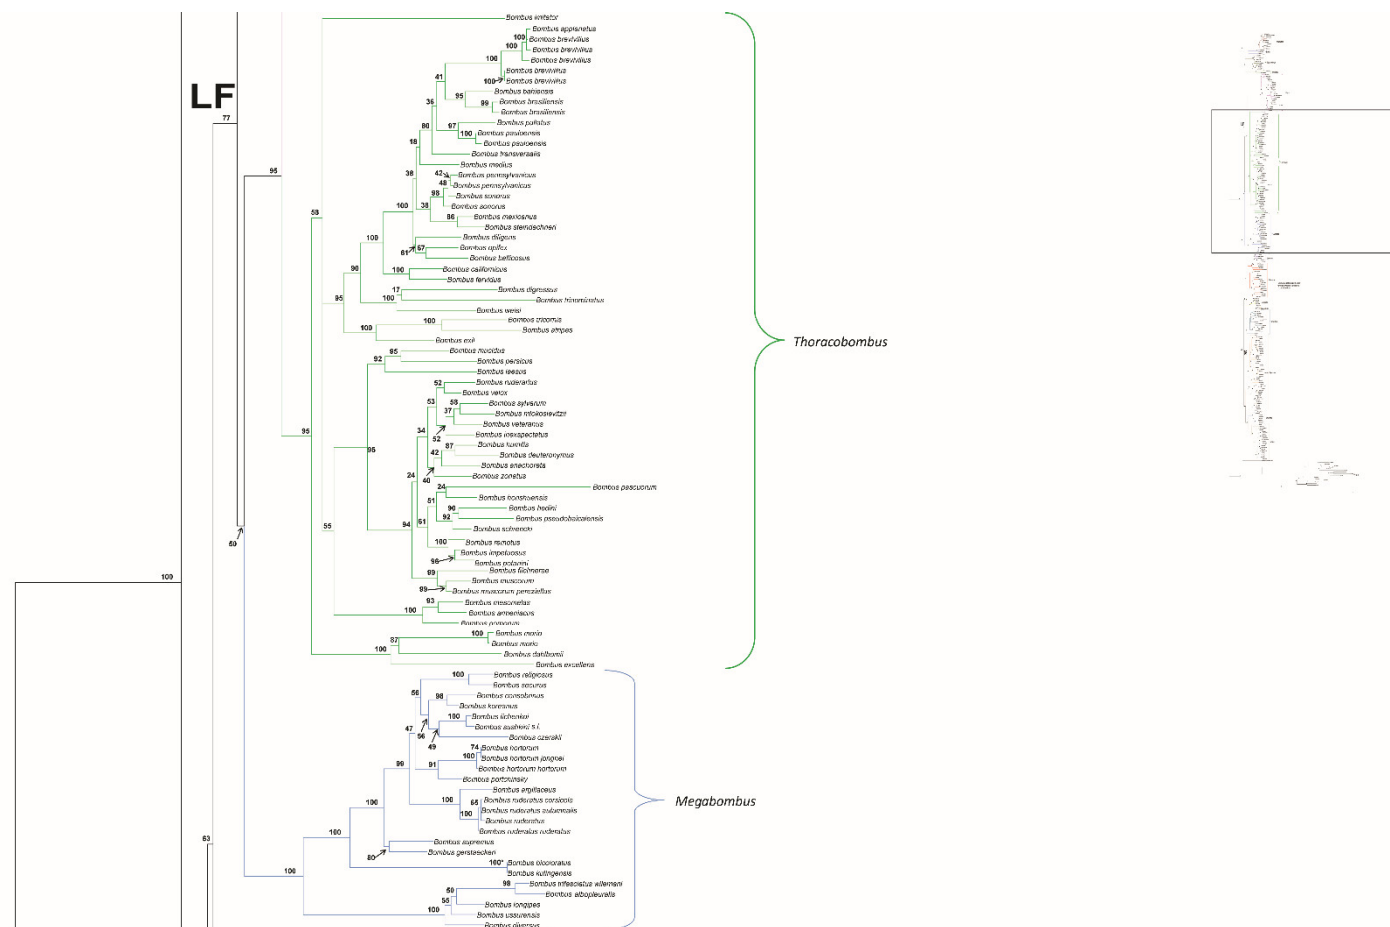

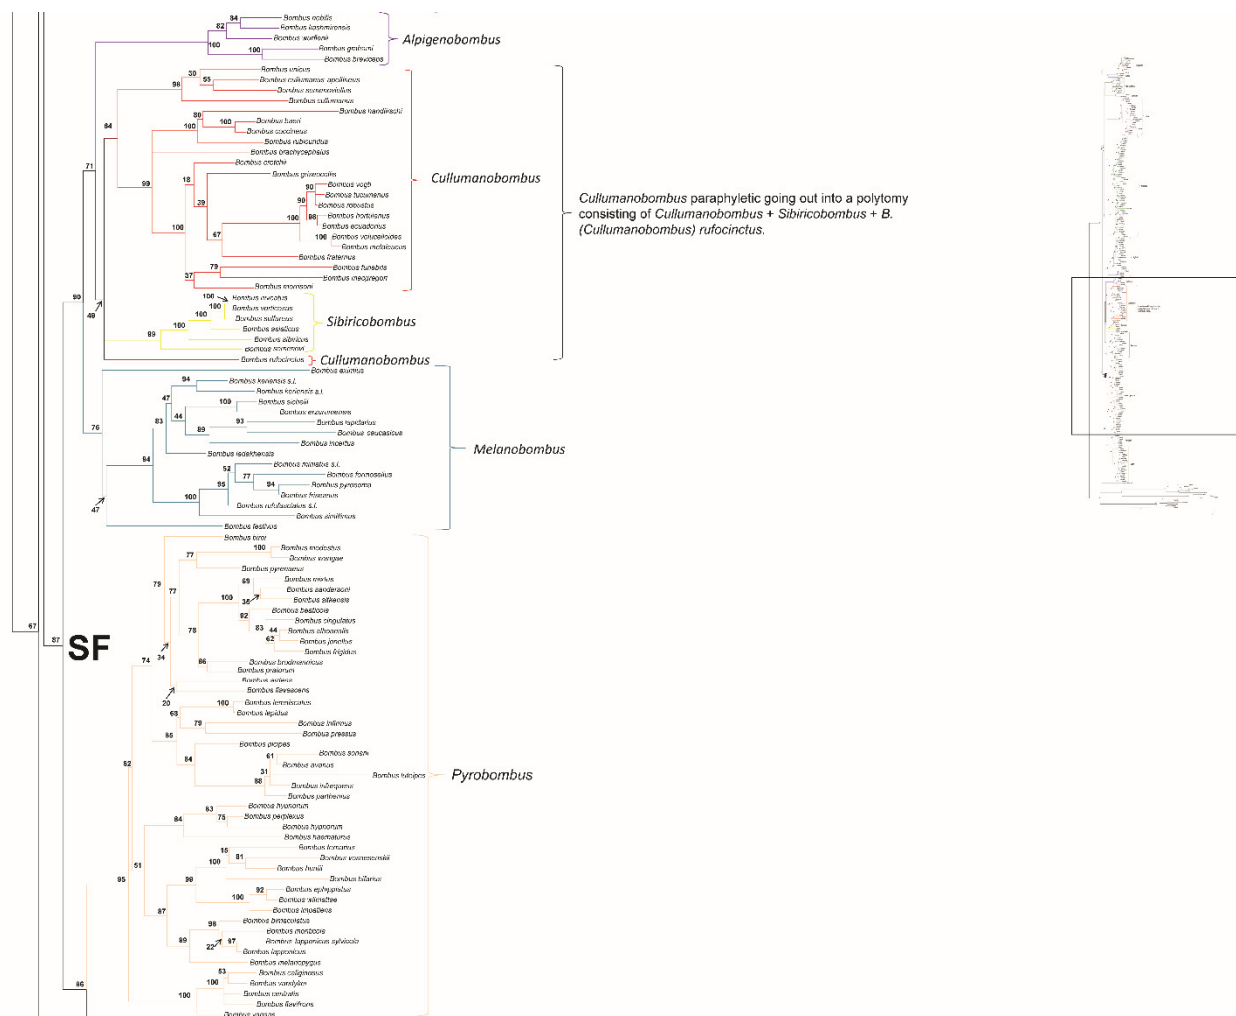

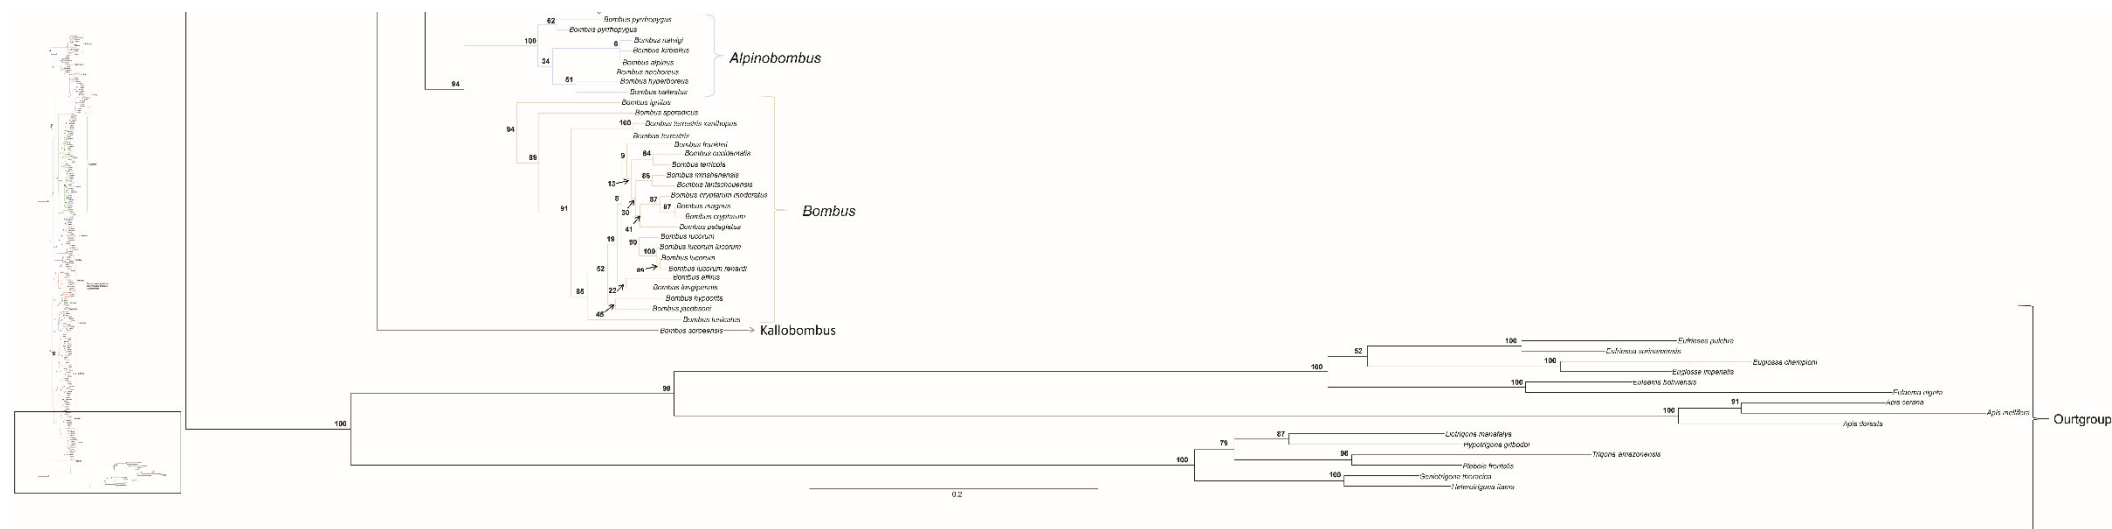

**Figure S9.** Maximum Likelihood tree – ML search obtained with RAxML. Topologies recovered with the data of matrix presented in Table S5. Bootstrap support values are indicated above each branch. Sister groups of the long-faced (LF) and short-faced (SF) bumblebees were shown.

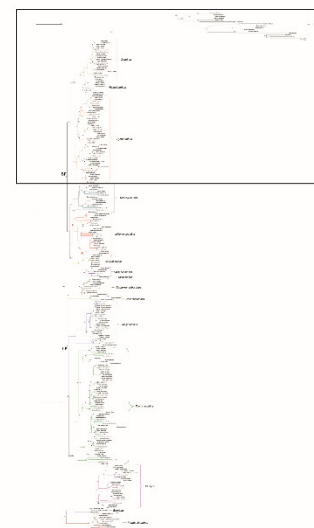

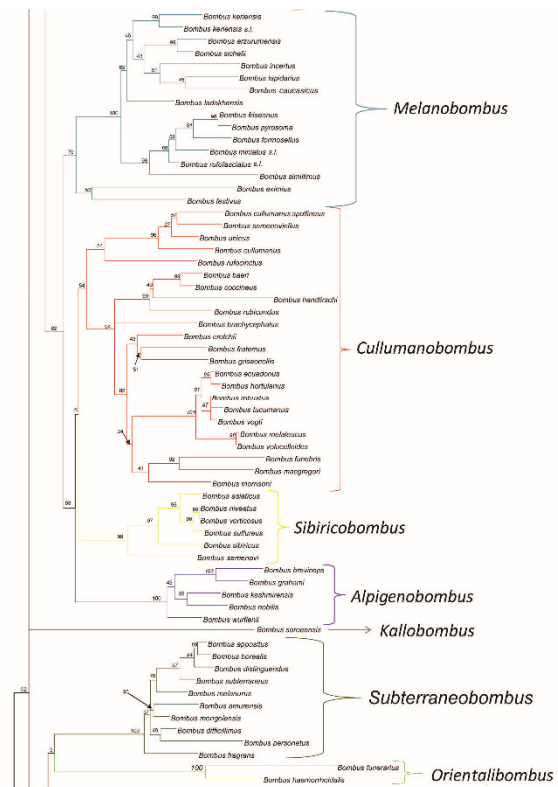



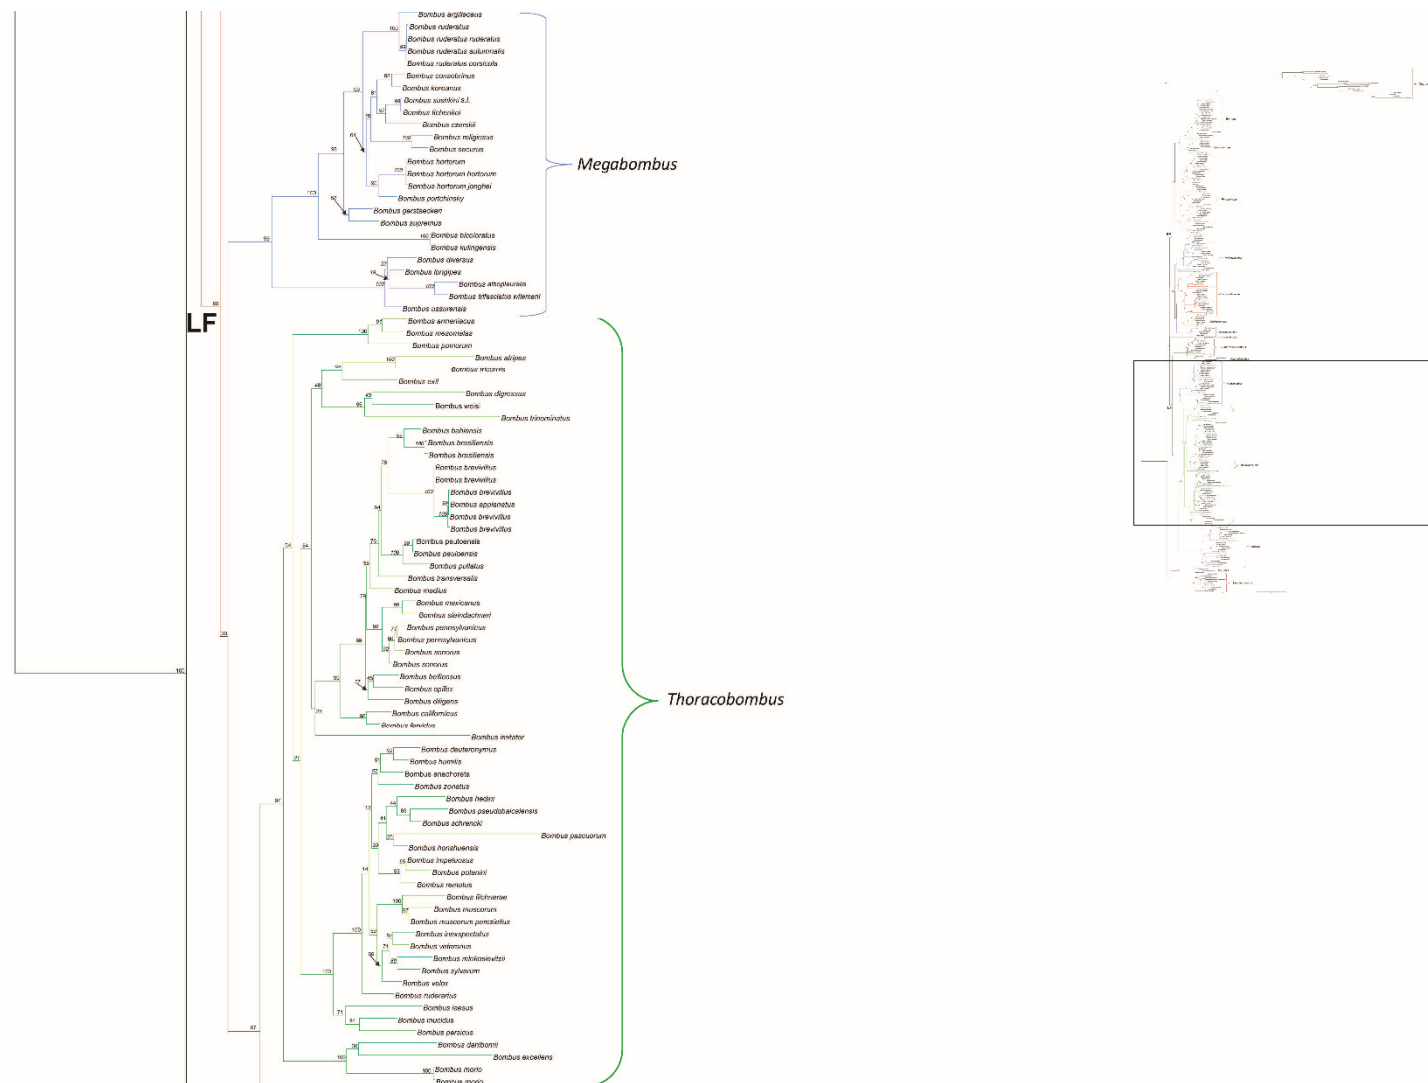

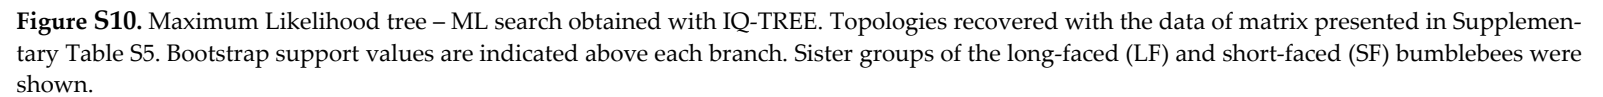

## S2. Priors for divergence time estimation

Divergence time estimates. We describe here the paleontological evidence upon which our nine calibration points are based.

Calibration 1 – The fossil bee *Euglossa moronei* Engel, 1999, which is from Miocene Dominican Republic amber [6]. Based on biostratigraphic and paleogeographic data, Dominican amber has been dated from of late Early Miocene through early Middle Miocene age (20.43–13.65 Ma; [7]). For this calibration point, we applied a lognormal distribution with mean of 1.0, Stdev of 0.8 and offset of 15 Ma (95% HPD: 15.6–28 Ma) to the node uniting *Euglossa* subgenus.

Calibration 2 – *Apis lithohermaea* Engel, 2006 is the oldest fossil record for crown group *Apis* (15.97–13.65 Ma). The fossil is from the Chôjabaru Formation of Iki Island, Japan which has been estimated to be from the middle Miocene. Based on some key morphological characters, it was assigned to the *dorsata* species group and was described as being quite similar to modern *Apis dorsata* [8]. This fossil therefore provides a minimum age for the diversification of *Apis dorsata* from *Apis cerana*, a member of the *mellifera* species group. A lognormal distribution with mean of 1.0, Stdev of 0.8 and offset of 10 Ma (95% HPD: 10.6–23 Ma) was applied as a prior for most recent common ancestor between *A. dorsata* and *A. cerana*.

Calibration 3 – The fossil bee *Eulaema* (*Apeulaema*) *zigrasi* Engel, 2014 (23.03–15.97 Ma), which is from Early Miocene Mexican amber [9]. For this calibration point, we applied a lognormal distribution with mean of 0.8 and Stdev of 0.9 and offset of 16 Ma (95% HPD: 16.4–29 Ma) to the node uniting *Apeulaema* species.

Calibration 4 – The fossil bee *Paleoeuglossa melissiflora* Poinar, 1998 (20.43–13.65 Ma), which is from Dominican Republic [10]. Belongs to *Eufriesea* according to Engel *et al.* [11]. For this calibration point, we applied a lognormal distribution with mean of 0.8 and Stdev of 0.9 and offset of 14 Ma (95% HPD: 14.4–27 Ma) to the node uniting *Eufriesea* species.

Calibration 5 – The fossil bee *Bombus* (*Bombus*) *randeckensis* Wappler & Engel, 2012 (18.97–13.65 Ma), which is from the Miocene Randeck Maar of southwestern Germany [12]. For this calibration point, we applied lognormal distribution with a mean of 0.8 and Stdev of 1 and offset of 14 Ma (95% HPD: 14.3–29.8 Ma) to the node uniting *Bombus* s.str.

Calibration 6 – *Oligobombus cuspidatus* Antropov, 2014 (37.2–33.9 Ma), which if from the Late Eocene Bembridge Marls (A'Court Smith Collection) [13]. It likely belongs to stem-group Bombini as well *Calyptapis florissantensis* Cockerell, 1906 [14]. For this calibration point, we applied a lognormal distribution with mean of 1.2 and Stdev of 0.7 and offset of 33 Ma (95% HPD: 33.8–46.1 Ma) to the node uniting *Bombus* species.

Calibration 7 – *Cretotrigona prisca* (Michener & Grimaldi, 1988) (70.6–66.043 Ma) is the oldest fossil bee and the oldest record of eusocial behavior among the Apoidea [15]. This fossil is from Late Cretaceous New Jersey amber, Delaware River, Kinkora [16]. For this calibration point, we applied a lognormal distribution with mean of 1 and Stdev of 0.9 and offset of 66 Ma (95% HPD: 66.5–81.9 Ma) to the node uniting Meliponina.

Calibration 8. The fossil bees *Liotrigonopsis rozeni* Engel, 2001 and *Kelneriapis eocenica* (Kelner-Pillault, 1969) these fossils are from eocenian Baltic amber (AMNH collection) [17]. For this calibration point, we applied a lognormal distribution with mean of 1 and Stdev of 0.8 and offset of 40 Ma (95% HPD: 40.6–53 Ma) to the node uniting *Liotrigona* and *Hypotrigona*.

Calibration 9 – The fossil bee *Bombus* (*Cullumanobombus*) *trophonius* Prokop, Dehon, Michez, Engel, 2017 (20.0–16.9 Ma), which is from the Early Miocene deposits of deposits of the Most Basin at the Bílina Mine, Czech Republic [18]. For this calibration point, we applied lognormal distribution with a mean of 1 and Stdev of 0.3 and offset of 15.9 Ma (95% HPD: 17.6–20.4 Ma) to the node uniting *Cullumanobombus*.

### S3. Methods and results of diversification patterns

#### S3.1. Methods

In order to understand the diversification of bumblebee lineages through time and the variation in rates of speciation and extinction, we used Bayesian Analysis of Macroevolutionary Mixtures (BAMM, [19]). This software employs reversible jump MCMC to explore the space of models of lineage diversification, and test hypotheses about the number of divergence events responsible for a given phylogenetic pattern [19]. This is a flexible Bayesian framework for inferring the number and location of shifts in macroevolutionary rates across a dated phylogenetic tree. We used the modified MCC tree as the input phylogeny (see section Biogeographic analyses and Figure S2 for the modified MCC tree and MCC tree, respectively). Rates were inferred across the phylogeny and variation in rates of speciation and extinction of bumblebee species through time were plotted in graphs. The analyses were made with 10 million generations, with a burn-in of 20%. Priors were set by BAMMtools package in R and all output from BAMM were also processed in BAMMtools [1].

#### S3.2. Results

Sampling models with up to eight different evolutionary regimes were tested, however, only schemes with zero-shift models were consistently selected in the BAMM analysis (genus *Bombus*, PP = 1; Figures S11 and S12). BAMM results showed an overall decreasing pattern (Figures S11 and S12) of marginal Bayesian posterior densities of macroevolutionary rates of diversification along the time and, also, that this variation was similar across the different clades.

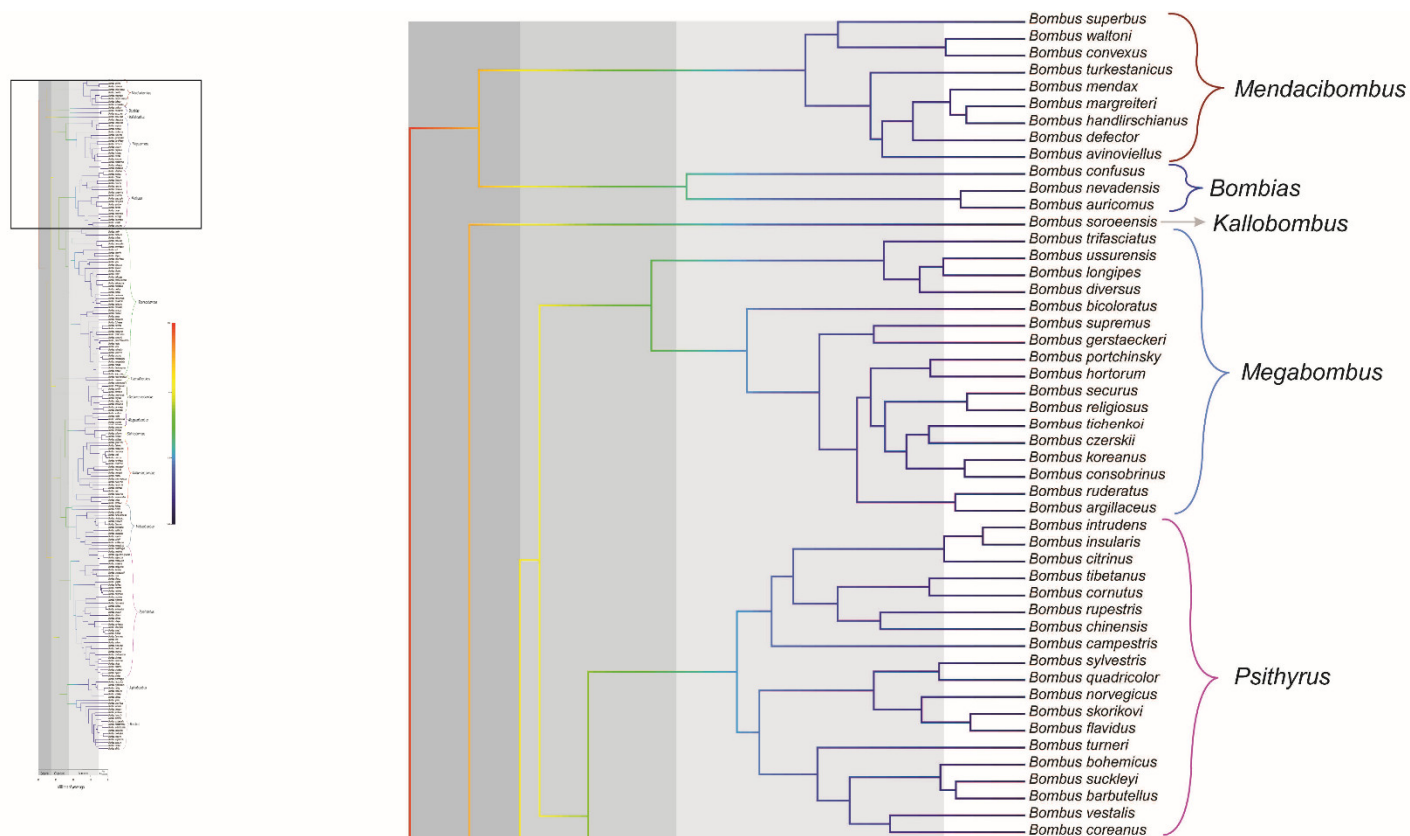

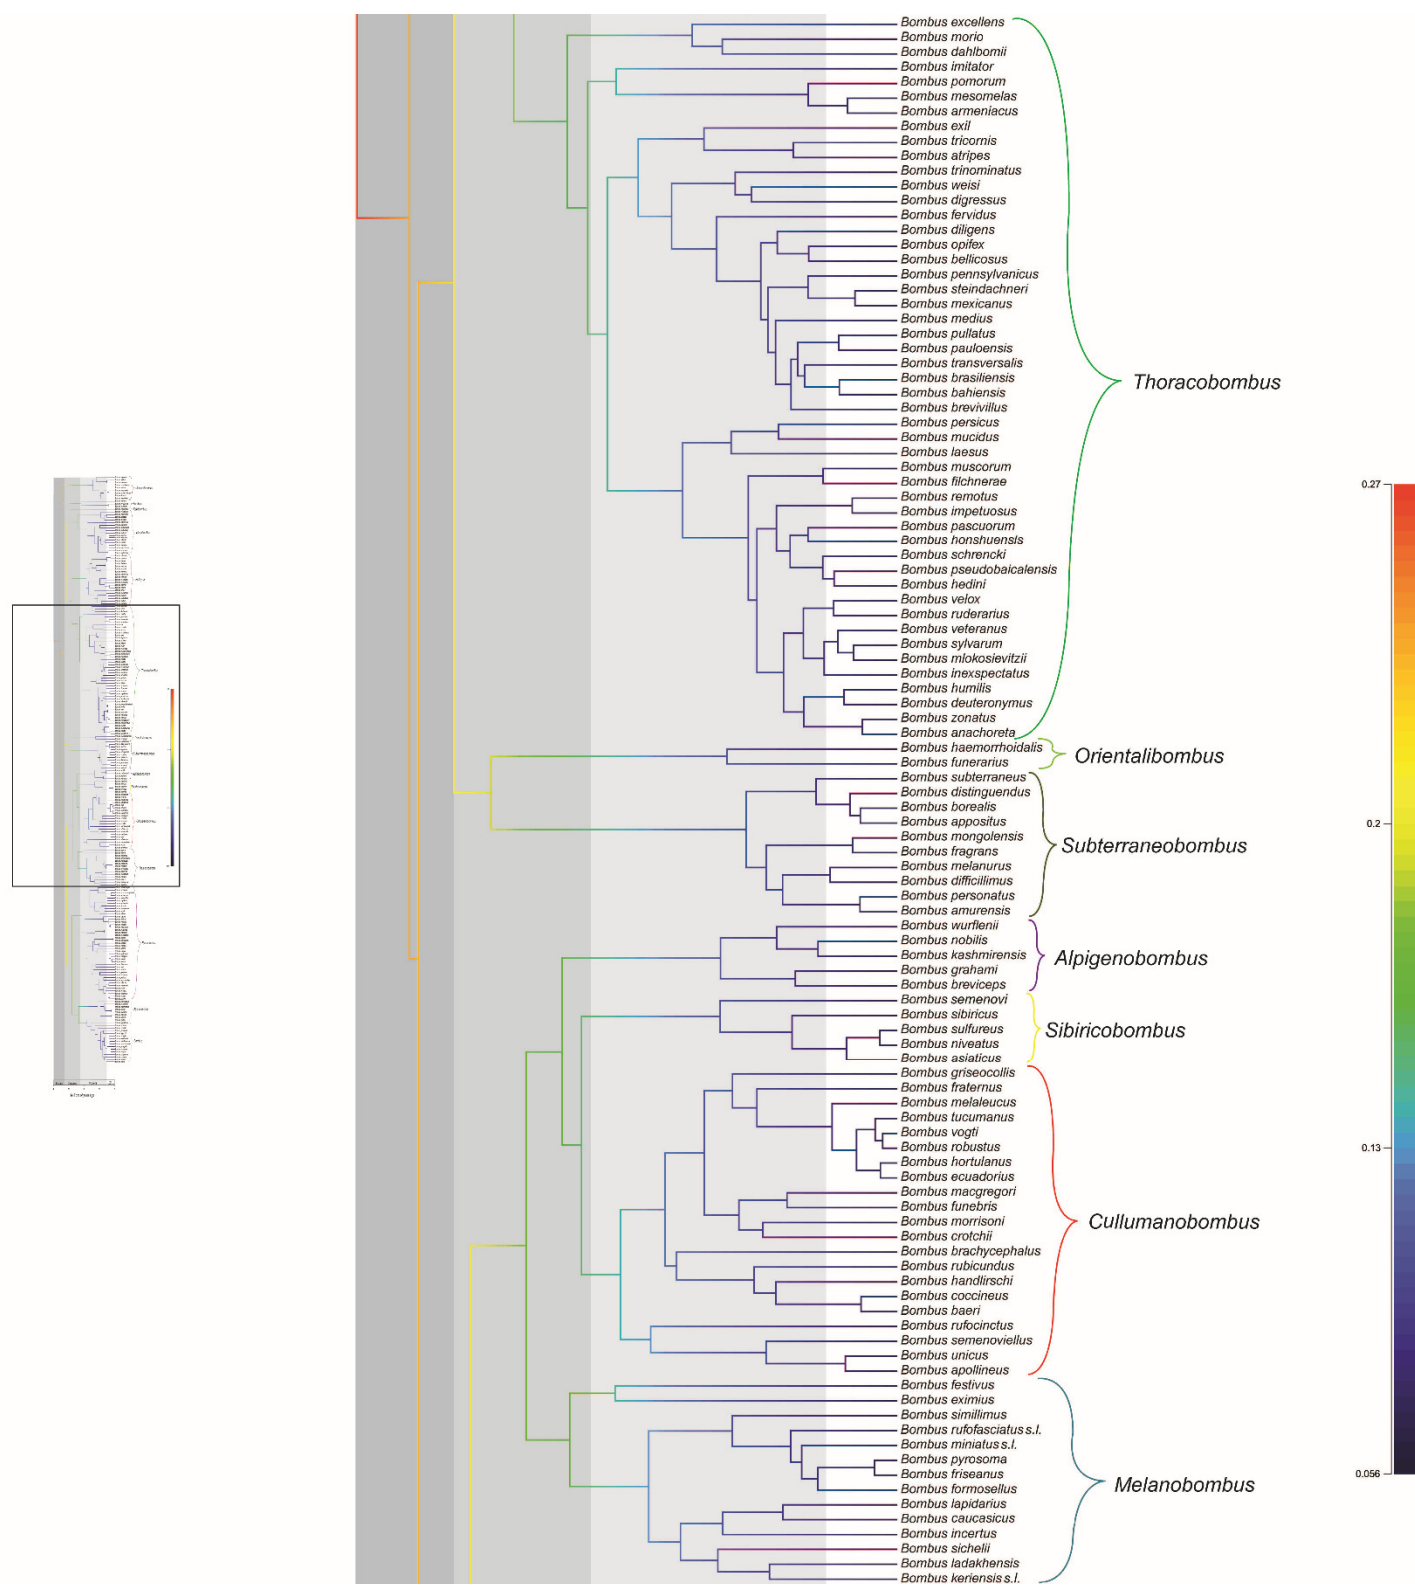

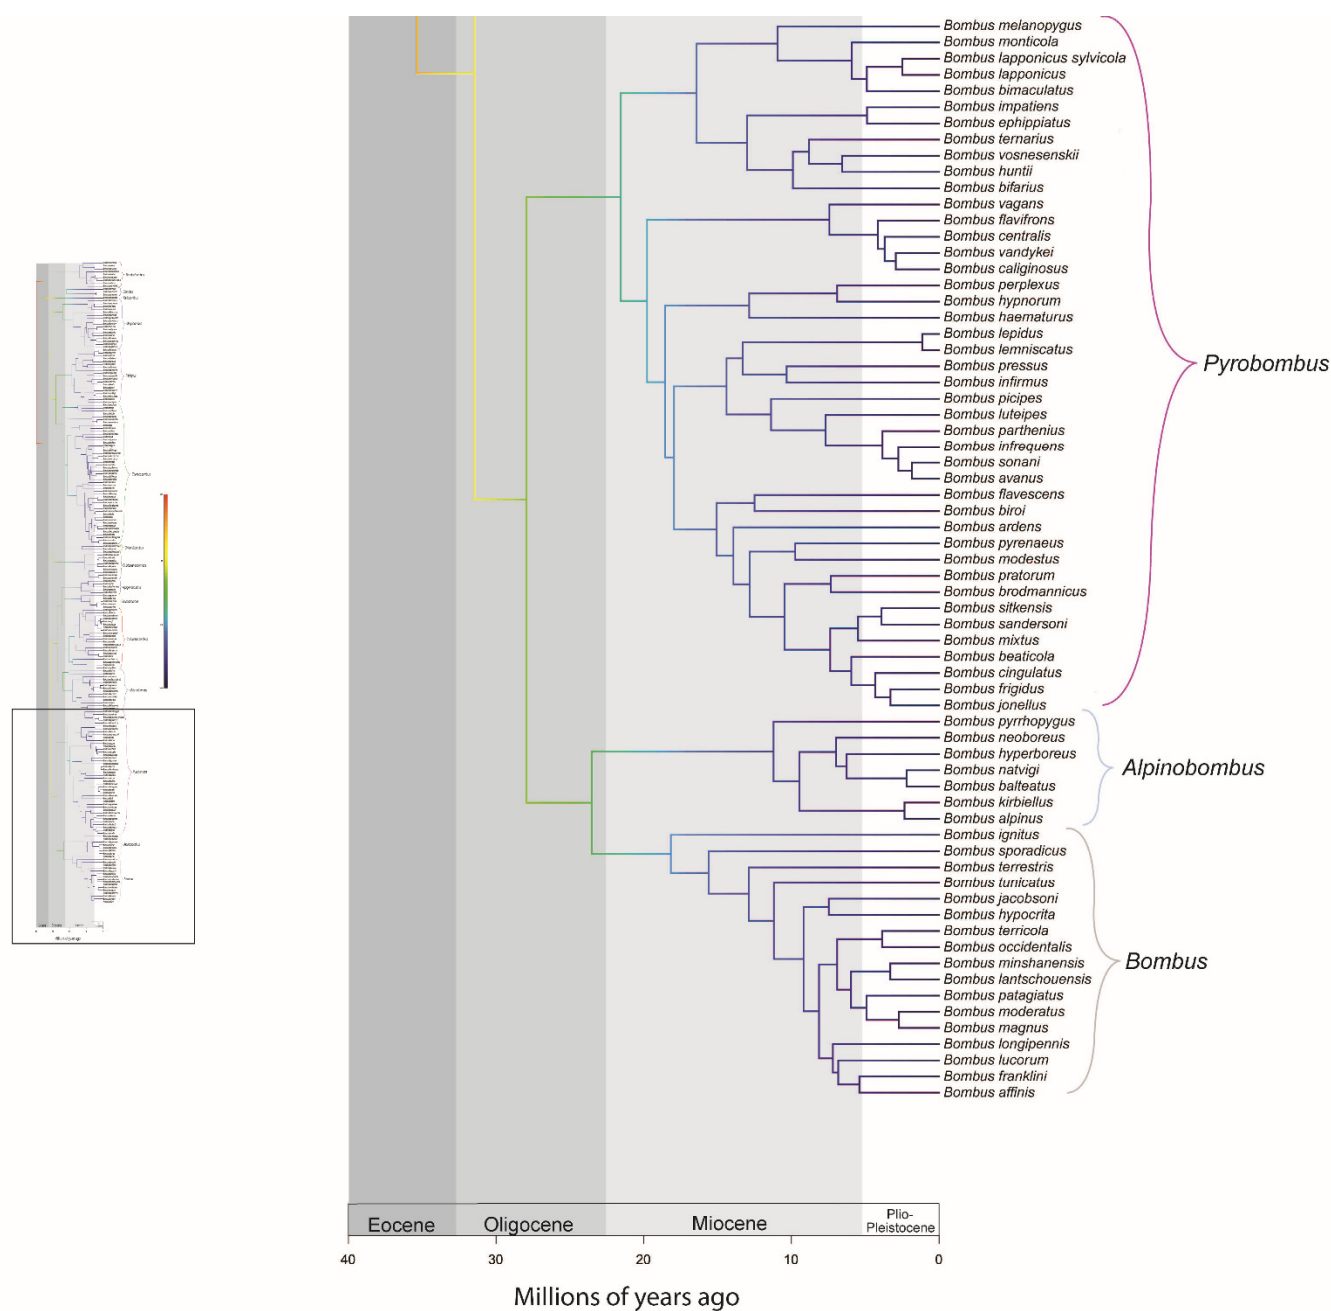

**Figure S11.** Bumblebee species chronogram with shading of branches reflective of estimated diversification rates (see scale at right) estimated in BAMM. Diversifications are the means of the marginal densities of the rates.



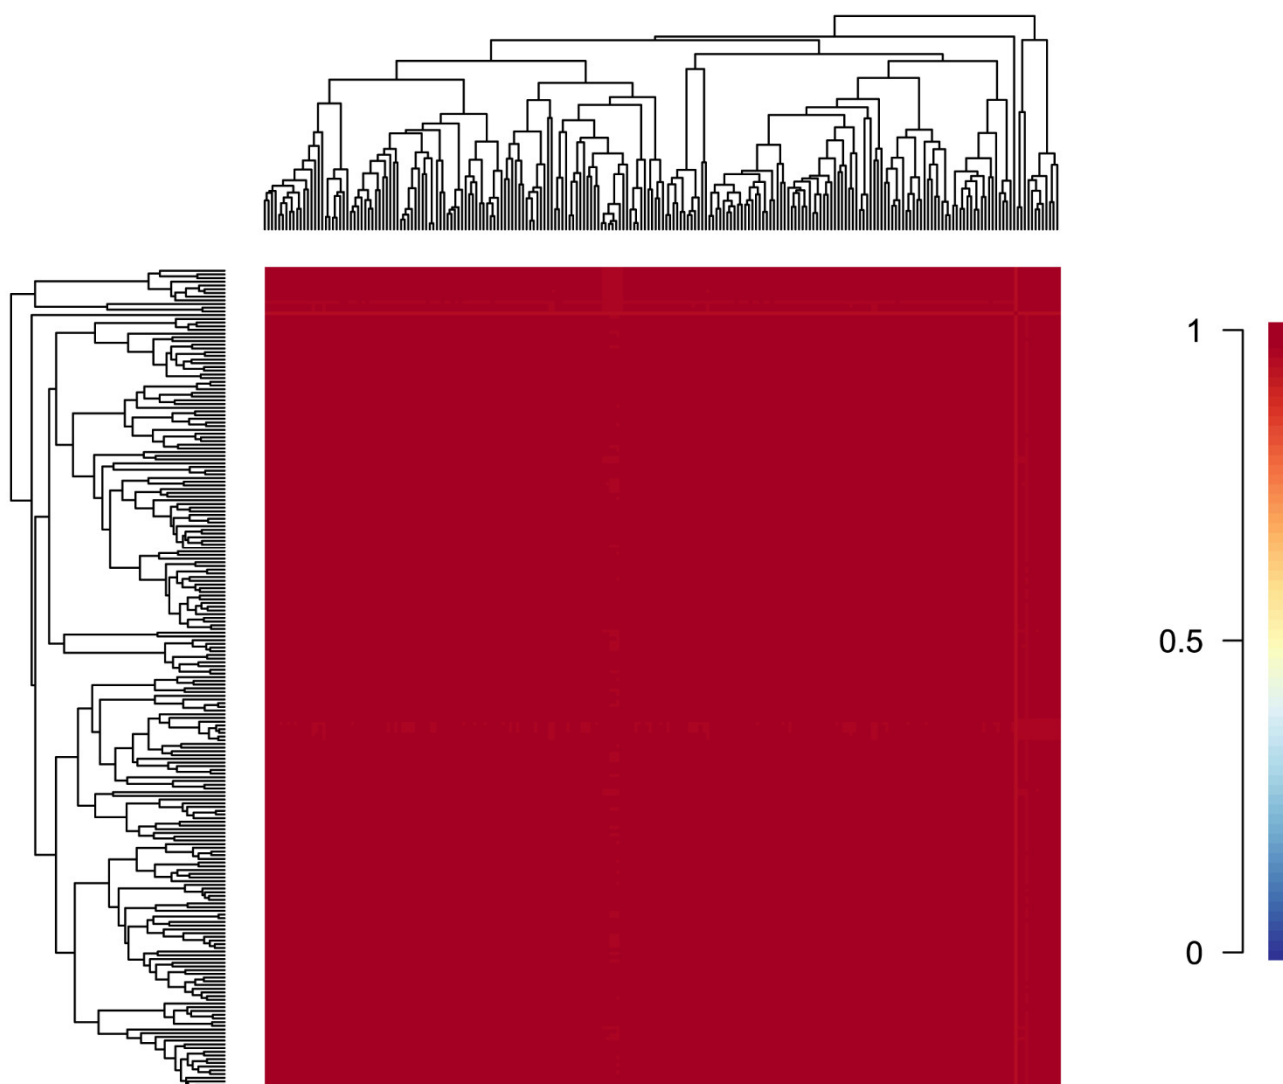

**Figure S12.** Macroevolutionary cohort matrix for diversification in bumblebees. Pairs of taxa with highly similar rates are depicted in hotter colors (red) and dissimilar rates are shown as colder colors (blue).

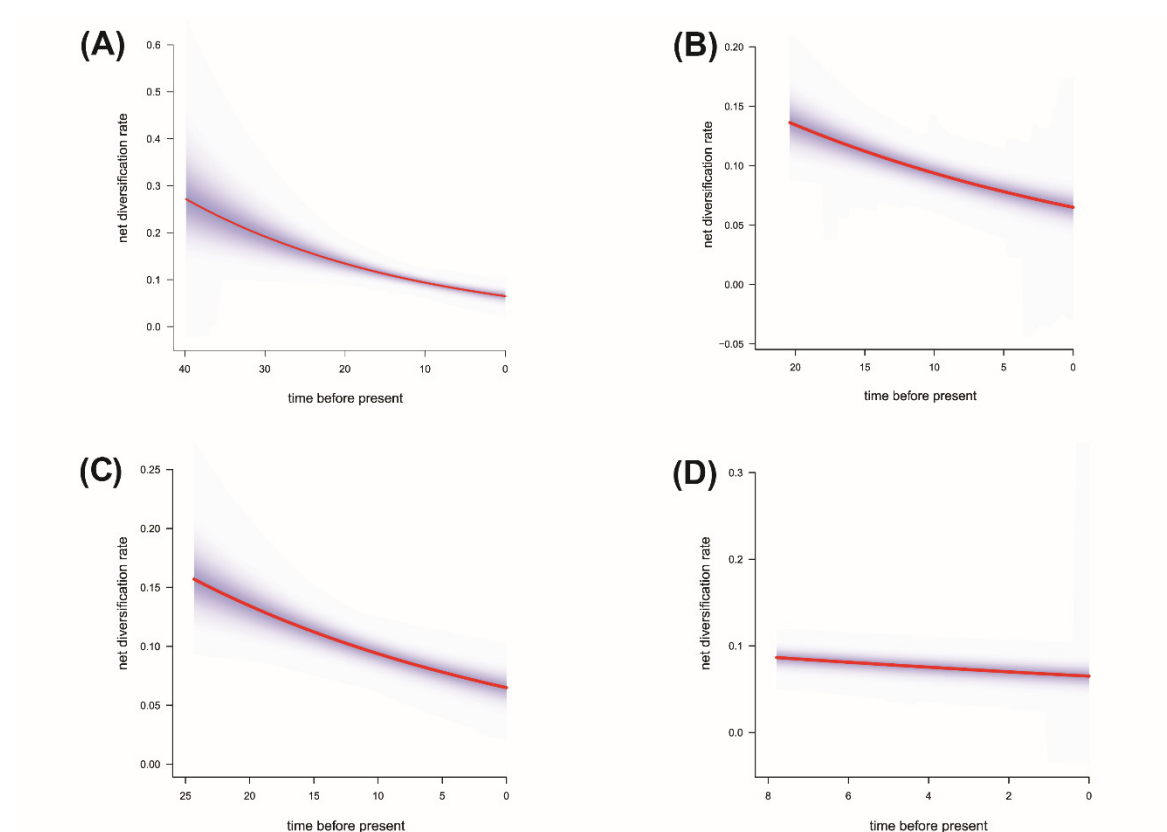

**Figure S13.** Estimates of speciation rate variability across the bumblebees (red line), with average global climate overlain [20]; purple line. (A)—All species; (B)—Brazilian species; (C)—*Cullumano-bombus* and (D)—*Thoracobombus* subgenus.

#### S4. Methods and results of missing data analyses

We removed 12S and CytB genes and 31 taxa (which do not share three or more genes with most of the other taxa) to assess the problem missing data in phylogenetic reconstruction and in divergence time estimates, Tables S9 and S10. While the Data set 1 has all characters for all 279 taxa (43.2% of missing data), the Data set 2 has 943,888 characters for 248 taxa (10.2% of missing data), Table S9. We analyzed Data set 2 as done for Data set 1, see sections “Phylogenetic inference” and “Divergence time estimation” in the main text for method descriptions.

The full-length concatenated alignment data employed for phylogenetic inference had a total length of 3,805 bp (see Table S10 for specimens used and amount of missing data). Best partitioning schemes and substitution models are presented in Table S11. The topologies and divergence time estimates found in the analyses of Data set 2 were very similar to those found in the analyses of Data set 1, Figures S14 and S15. Therefore, the differences among our results and the topologies/divergence time estimates found by previous works (*i.e.* Hines [21] and Condamine & Hines [22] results) appears not to be a result of missing data bias in reconstructing trees. Our results strongly support the phylogenetic inferences about topology because informative data were analysed. Furthermore, many studies suggest that missing data are not generally problematic for Bayesian inferences and that the practice of excluding characters simply because they contain missing data may reduce accuracy [23].

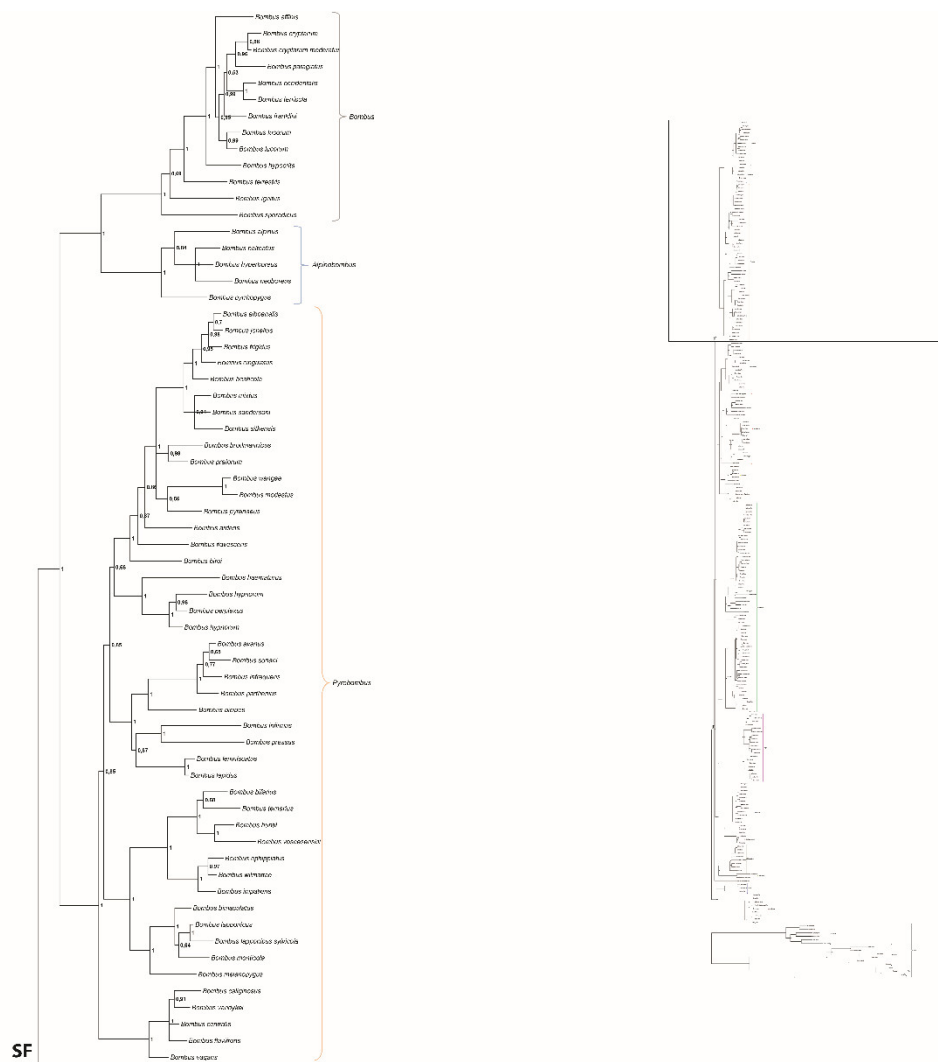

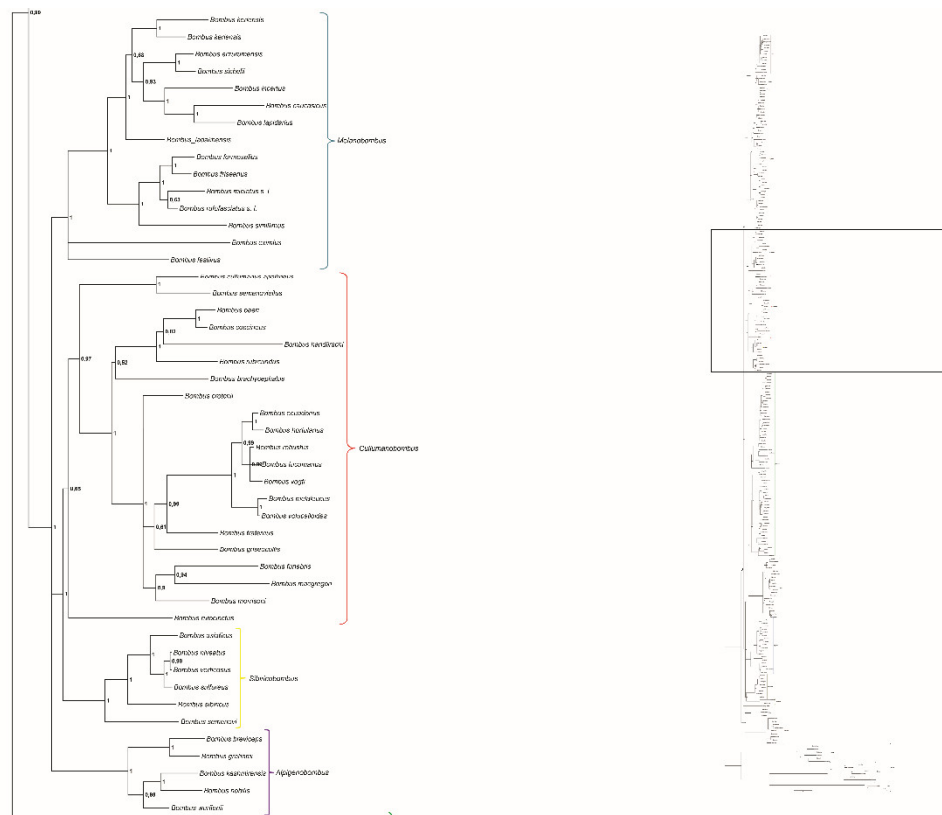

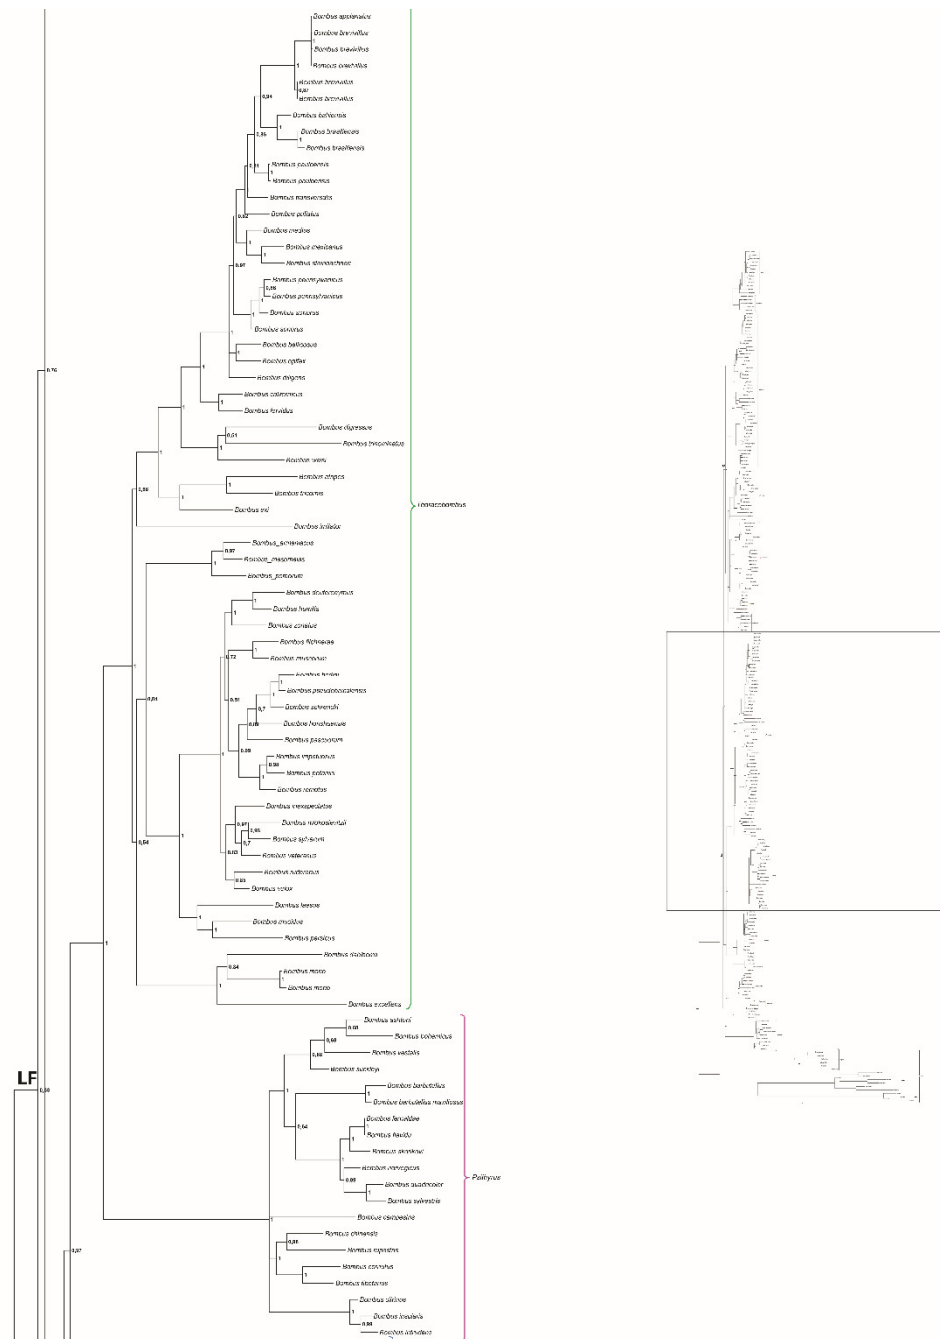

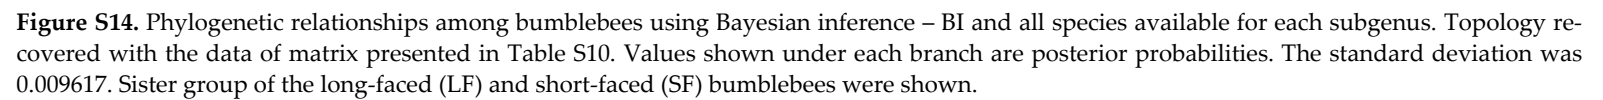



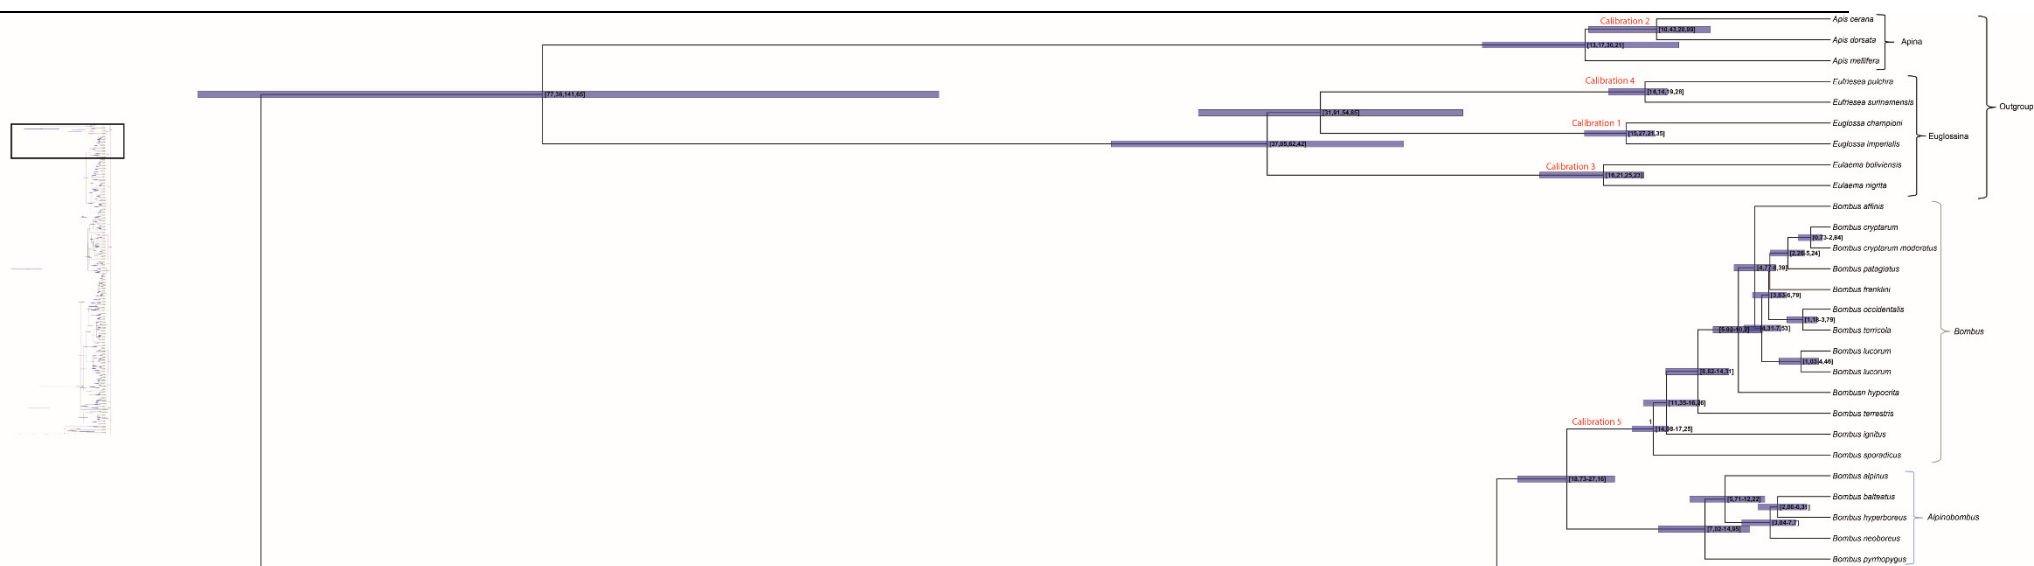

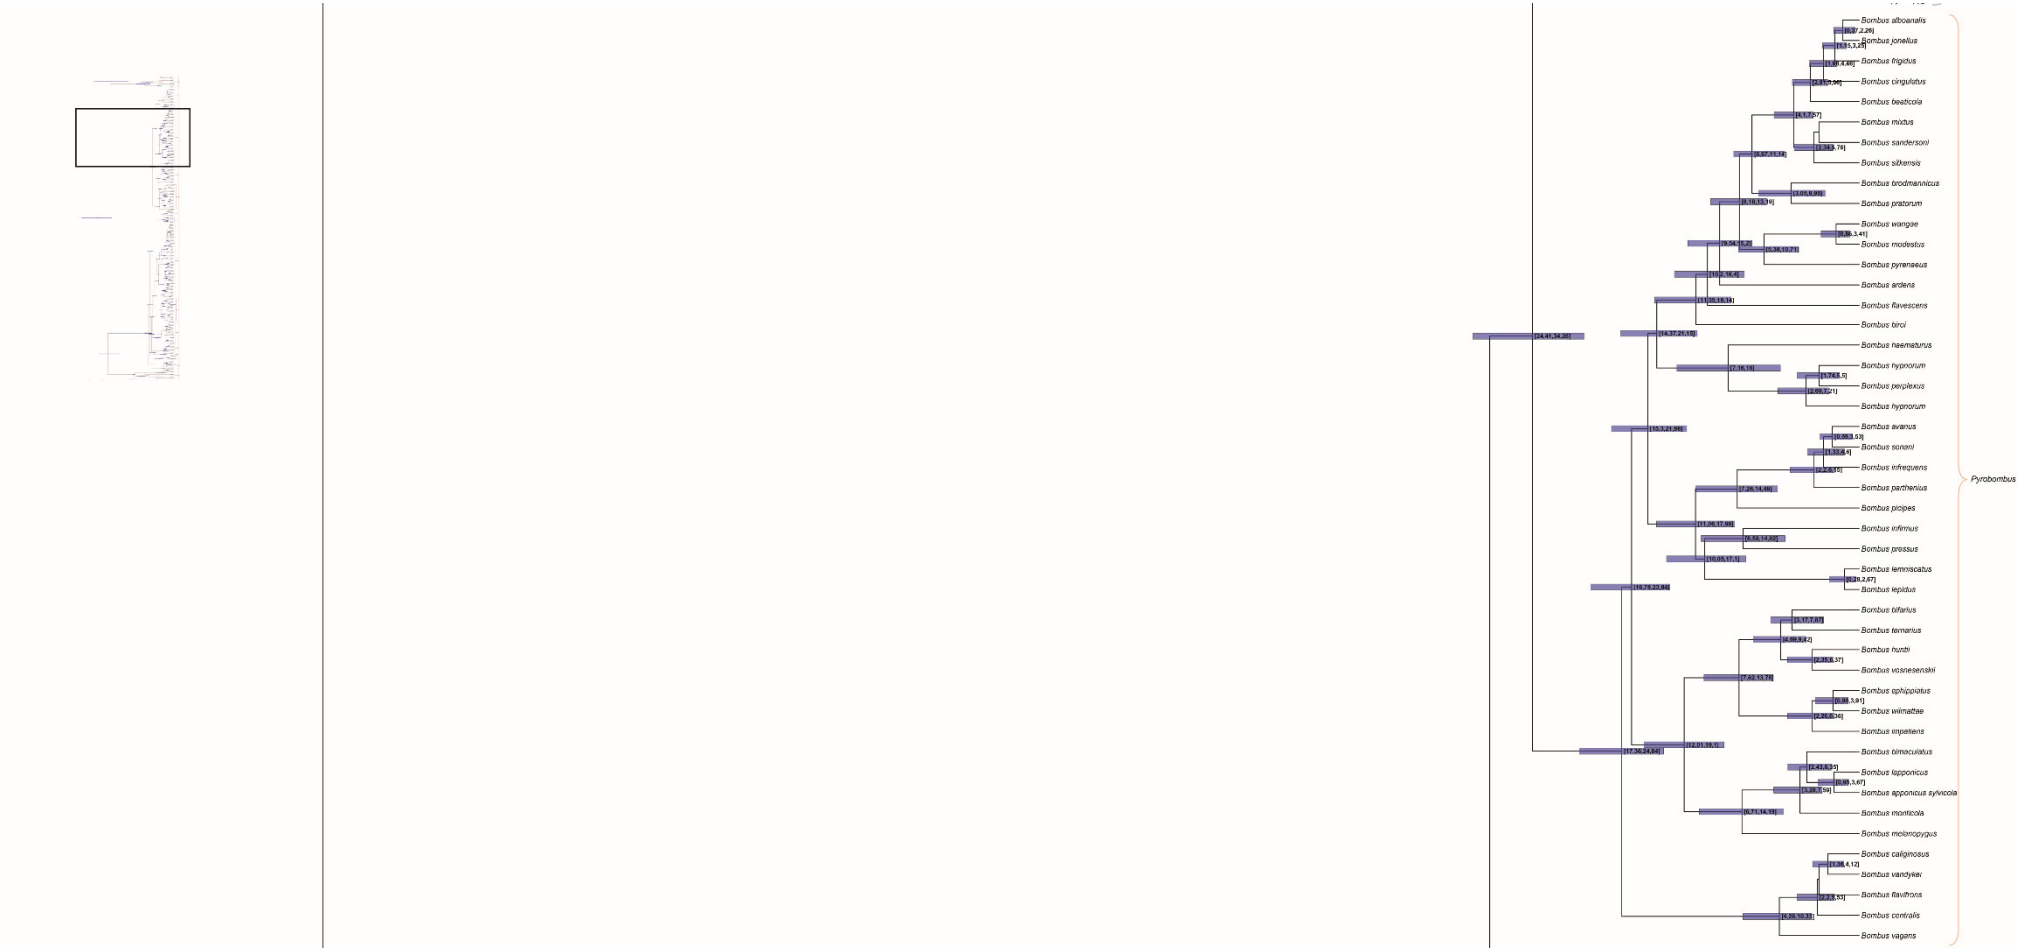

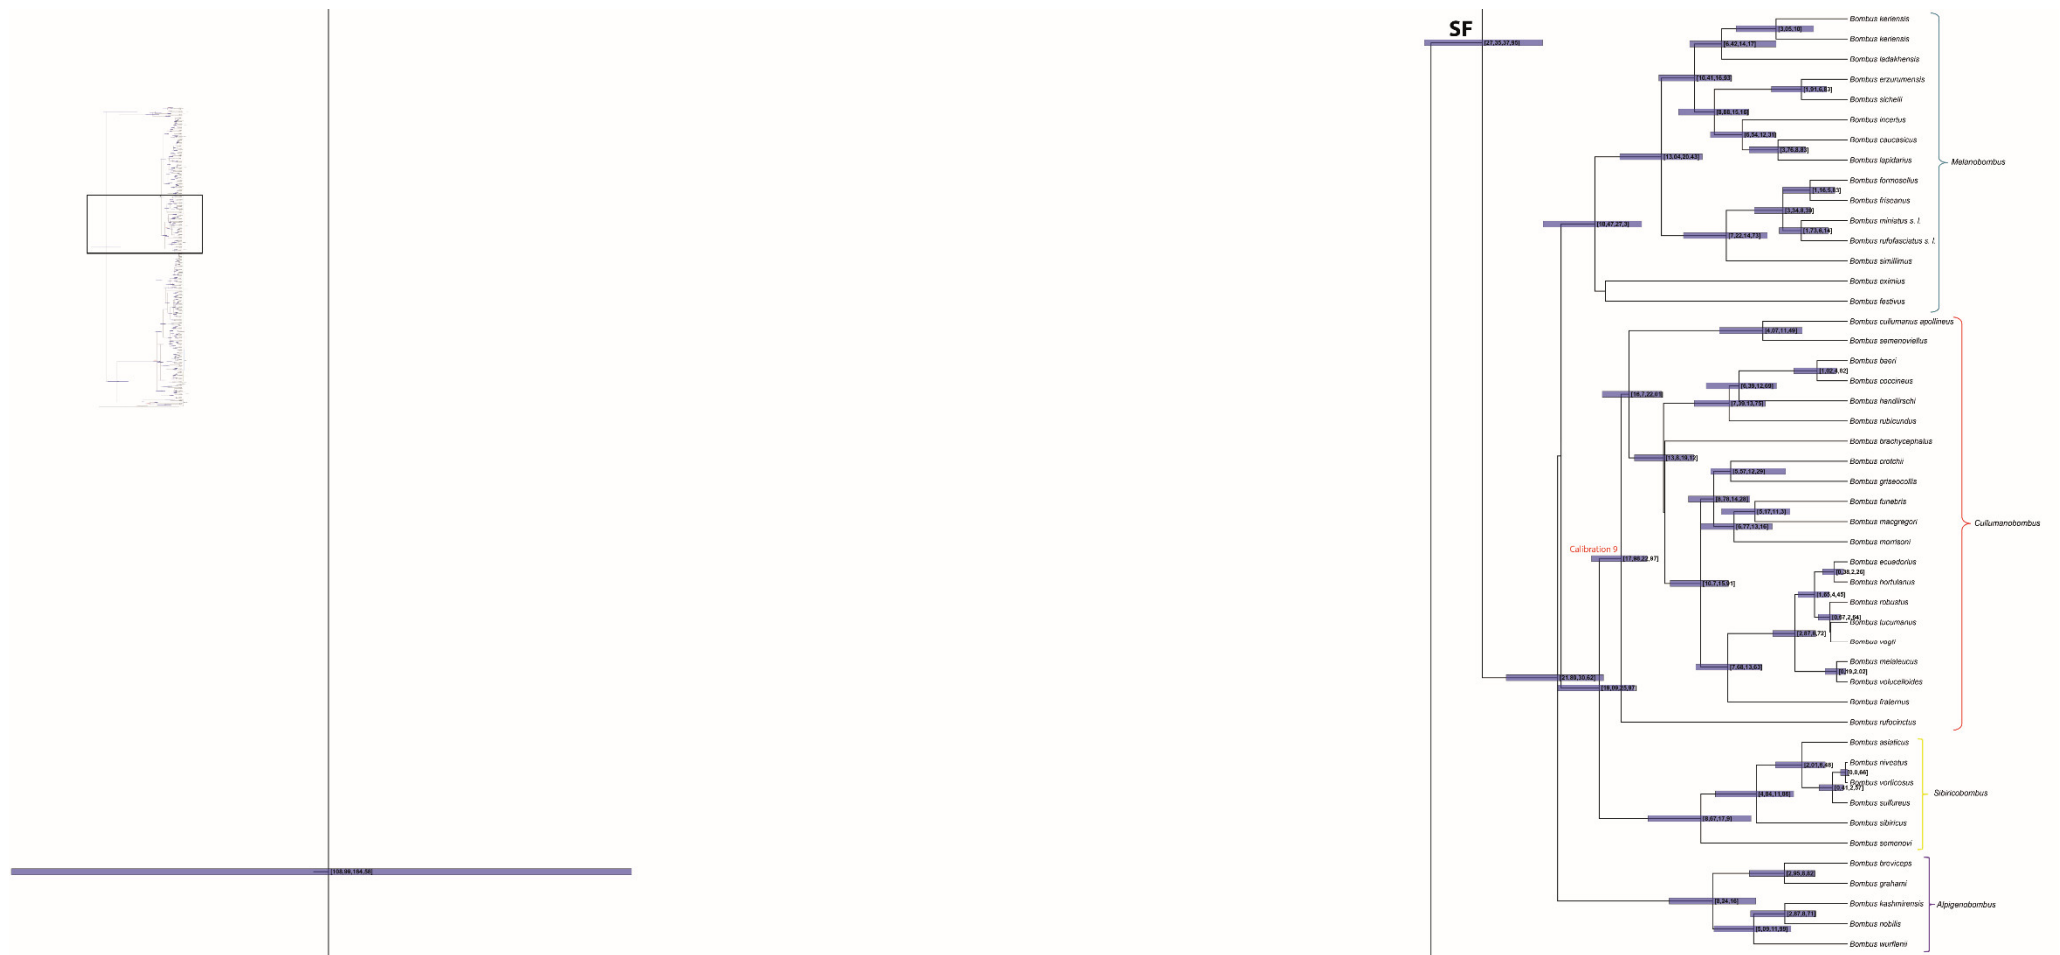

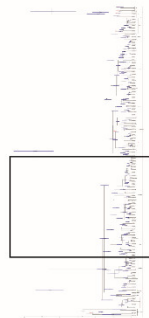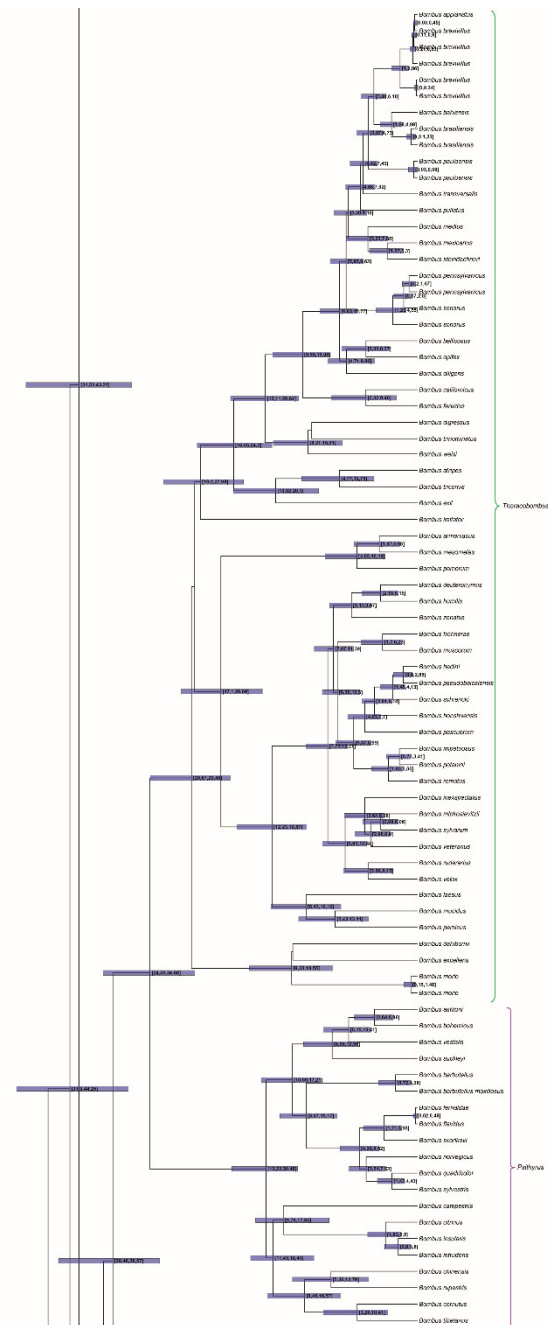

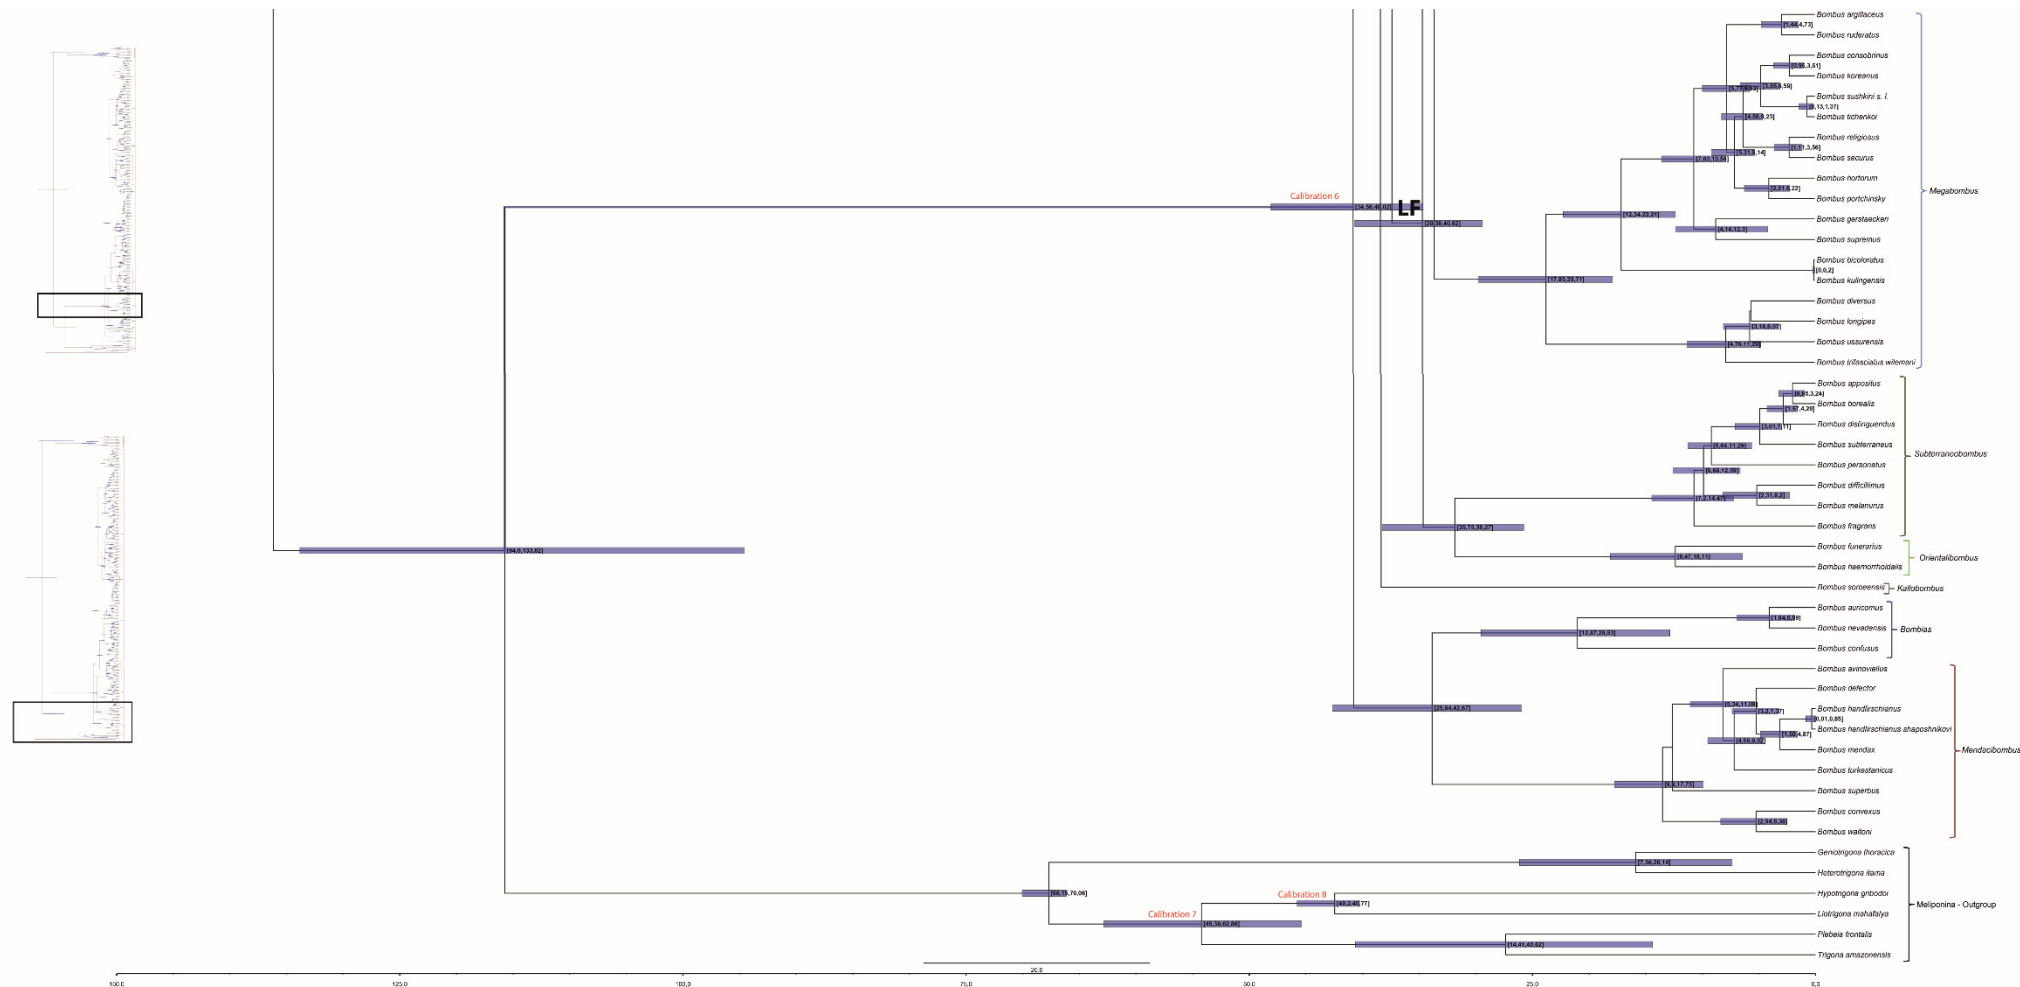

**Figure S15.** Estimated divergence times using Uncorrelated Lognormal Relaxed Clock model (BEAST v2.4.4). Maximum clade credibility tree depicting branch lengths equal to the median ages calculated from 9,000 post burn-in chronograms (10%). Bars show 95% Highest Posterior Density intervals of age nodes and the numbers in the brackets show dates on million years ago (Ma). Calibration points are shown above the branches in red, these refer to the fossils of Appendix B – Priors for divergence time estimation. The values shown below the tree are dates on million years. Sister group of the long-faced (LF) and short-faced (SF) bumblebees were shown.

**Table S9.** Basic information on the two data sets used in analyses about the impacts of missing data.

| Data Set | Character Data                   | Number Taxa | Number Characters | Number of Missing Data Characters | Missing Data (%) Per Matrix |
|----------|----------------------------------|-------------|-------------------|-----------------------------------|-----------------------------|
| 1        | 4 mitochondrial, 4 nuclear genes | 279         | 1,726,731         | 746,360                           | 43.2                        |
| 2        | 2 mitochondrial, 4 nuclear genes | 248         | 943,888           | 96,090                            | 10.2                        |

**Table S10.** Data of full-length concatenated alignment data used on phylogenetic analysis. Introns of the genes Argk, Opsin and PEPCK belonging to outgroup taxa and the 12S were removed of analyses. TL – Total length; N – Number of charsets; Numbers between parenthesis refer to indels and when followed by 'N' the nucleotide base is not known.

| Taxon                                   |         |    |         | Argk |             |     | EF1a      |        |            |              |            |          |
|-----------------------------------------|---------|----|---------|------|-------------|-----|-----------|--------|------------|--------------|------------|----------|
|                                         | TL (pb) | N  | 16S     | Exon | Argk Intron | COI | EF1a Exon | Intron | Opsin Exon | Opsin Intron | PEPCK Exon | PEPCKI   |
| <i>Apis cerana</i>                      | 2496    | 6  | 412 (3) | 530  | 0           | 449 | 529       | 85     | 491        | 0            | 0          | 0        |
| <i>Apis dorsata</i>                     | 2795    | 7  | 384 (6) | 468  | 0           | 480 | 529       | 85     | 501        | 0            | 348        | 0        |
| <i>Apis mellifera</i>                   | 2893    | 7  | 384 (4) | 599  | 0           | 480 | 529       | 85     | 462        | 0            | 354        | 0        |
| <i>Bombus affinis</i> voucher SC167     | 3805    | 10 | 441     | 599  | 248         | 480 | 529       | 85     | 501        | 101          | 381        | 440 (40) |
| <i>Bombus alagesianus</i> voucher SC085 | 3736    | 10 | 441     | 539  | 248         | 471 | 529       | 85     | 501        | 101          | 381        | 440      |
| <i>Bombus alboanalis</i> voucher SC257  | 3325    | 9  | 441     | 599  | 248         | 0   | 529       | 85     | 501        | 101          | 381        | 440      |
| <i>Bombus alpinus</i> voucher SC029     | 3805    | 10 | 441     | 599  | 248         | 480 | 529       | 85     | 501        | 101          | 381        | 440      |
| <i>Bombus apollineus</i> voucher SC084  | 3285    | 9  | 441     | 599  | 248 (32)    | 0   | 529       | 85     | 501        | 101          | 357        | 424      |
| <i>Bombus applanatus</i> voucher EF209  | 1810    | 5  | 0       | 488  | 248 (1)     | 480 | 509       | 85     | 0          | 0            | 0          | 0        |
| <i>Bombus appositus</i> voucher SC145   | 3709    | 10 | 441     | 599  | 248 (1)     | 384 | 529       | 85     | 501        | 101          | 381        | 440 (11) |
| <i>Bombus ardens</i> voucher SC131      | 3736    | 10 | 441     | 530  | 248         | 480 | 529       | 85     | 501        | 101          | 381        | 440      |
| <i>Bombus argillaceus</i> voucher SC058 | 3805    | 10 | 441     | 599  | 248 (1)     | 480 | 529       | 85     | 501        | 101          | 381        | 440      |
| <i>Bombus armeniacus</i> voucher SC080  | 3325    | 9  | 441     | 599  | 248 (1)     | 0   | 529       | 85     | 501        | 101          | 381        | 440      |
| <i>Bombus ashtoni</i> voucher SC164     | 3736    | 10 | 441     | 530  | 248 (2)     | 480 | 529       | 85     | 501        | 101          | 381        | 440 (37) |
| <i>Bombus asiaticus</i> voucher SC249   | 3167    | 9  | 441     | 539  | 248         | 0   | 529       | 85     | 501        | 92           | 381        | 351      |
| <i>Bombus atripes</i> voucher SC066     | 3311    | 9  | 441     | 588  | 248 (57)    | 0   | 529       | 85     | 501        | 101          | 378        | 440      |

| Taxon                                      | TL (pb) | N  | 16S | Argk |             |             | EF1a      |        |             |                |            |          |
|--------------------------------------------|---------|----|-----|------|-------------|-------------|-----------|--------|-------------|----------------|------------|----------|
|                                            |         |    |     | Exon | Argk Intron | COI         | EF1a Exon | Intron | Opsin Exon  | Opsin Intron   | PEPCK Exon | PEPCKI   |
| <i>Bombus auricomus</i> voucher SC062      | 3650    | 10 | 441 | 444  | 248 (49)    | 480         | 529       | 85     | 501         | 101 (11)       | 381        | 440 (3)  |
| <i>Bombus avanus</i> voucher SC272         | 3264    | 9  | 441 | 599  | 248         | 0           | 529       | 85     | 501         | 101            | 357        | 403 (4)  |
| <i>Bombus avinoviellus</i> voucher SC242   | 3237    | 9  | 441 | 539  | 248 (12)    | 0           | 529       | 85     | 473         | 101 (1 'N', 2) | 381        | 440      |
| <i>Bombus baeri</i> voucher SC174          | 3265    | 9  | 441 | 539  | 248 (17)    | 0           | 529       | 85     | 501         | 101            | 381        | 440      |
| <i>Bombus bahiensis</i> 52893              | 3572    | 10 | 441 | 539  | 248 (1)     | 480         | 513       | 85     | 473         | 101            | 348        | 344 (1)  |
| <i>Bombus balteatus</i> voucher SC039      | 3796    | 10 | 441 | 599  | 248         | 471         | 529       | 85     | 501         | 101            | 381        | 440      |
| <i>Bombus barbutellus</i> voucher SC073    | 3718    | 10 | 441 | 599  | 248 (1)     | 393 (4 'N') | 529       | 85     | 501         | 101            | 381        | 440 (37) |
| <i>Bombus beaticola</i> J5                 | 2463    | 7  | 0   | 530  | 248         | 480         | 518       | 85     | 501         | 101            | 0          | 0        |
| <i>Bombus bellicosus</i> voucher SC221     | 3656    | 10 | 441 | 539  | 248 (1)     | 419         | 529       | 85     | 473         | 101 (1 'N', 2) | 381        | 440      |
| <i>Bombus bicoloratus</i> voucher SC225    | 3639    | 10 | 441 | 530  | 248 (1)     | 480         | 529       | 85     | 501         | 101            | 348        | 376      |
| <i>Bombus bifarius</i> voucher SC208       | 3460    | 10 | 441 | 530  | 248 (78)    | 204         | 529       | 85     | 501         | 101            | 381        | 440      |
| <i>Bombus bimaculatus</i> voucher SC218    | 3805    | 10 | 441 | 599  | 248 (78)    | 480         | 529       | 85     | 501         | 101            | 381        | 440      |
| <i>Bombus biroi</i> voucher SC210          | 3265    | 9  | 441 | 539  | 248         | 0           | 529       | 85     | 501         | 101            | 381        | 440      |
| <i>Bombus bohemicus</i> voucher SC055      | 3649    | 10 | 441 | 530  | 248 (2)     | 393 (4 'N') | 529       | 85     | 501         | 101            | 381        | 440 (37) |
| <i>Bombus borealis</i> voucher SC250       | 3688    | 10 | 441 | 530  | 248 (1)     | 480         | 529       | 85     | 501         | 101            | 351        | 422 (11) |
| <i>Bombus brachycephalus</i> voucher SC230 | 3325    | 9  | 441 | 599  | 248 (17)    | 0           | 529       | 85     | 501         | 101            | 381        | 440      |
| <i>Bombus brasiliensis</i> 1218400         | 3585    | 10 | 441 | 539  | 248 (1)     | 480         | 529       | 85     | 473         | 101            | 348        | 341 (1)  |
| <i>Bombus brasiliensis</i> voucher SC219   | 2796    | 8  | 441 | 0    | 0           | 435         | 529       | 85     | 473 (3 'N') | 101 (7 'N', 2) | 381        | 351      |
| <i>Bombus breviceps</i> voucher SC190      | 3739    | 10 | 441 | 599  | 248         | 414         | 529       | 85     | 501         | 101            | 381        | 440      |
| <i>Bombus brevivillus</i> 1200916          | 3412    | 10 | 441 | 414  | 248 (1)     | 435         | 521       | 85     | 473         | 101            | 348        | 346 (1)  |
| <i>Bombus brevivillus</i> 1202754          | 3501    | 10 | 441 | 508  | 248 (1)     | 435         | 520       | 85     | 473         | 101            | 348        | 342 (1)  |
| <i>Bombus brevivillus</i> 1207210          | 3407    | 10 | 441 | 414  | 248 (1)     | 461         | 497       | 85     | 473         | 101            | 348        | 339 (1)  |
| <i>Bombus brevivillus</i> 1207320          | 3324    | 10 | 441 | 414  | 248 (1)     | 466         | 529       | 85     | 473         | 101            | 348        | 219      |
| <i>Bombus brevivillus</i> 1207321          | 3444    | 10 | 441 | 414  | 248 (1)     | 466         | 529       | 85     | 473         | 101            | 348        | 339 (1)  |
| <i>Bombus brodmannicus</i> voucher SC077   | 3773    | 10 | 441 | 599  | 248         | 448         | 529       | 85     | 501         | 101            | 381        | 440      |
| <i>Bombus californicus</i> voucher SC306   | 3297    | 9  | 441 | 599  | 248 (1)     | 0           | 529       | 85     | 473         | 101 (2)        | 381        | 440      |



| Taxon                                     | TL (pb) | N  | 16S     | Argk |             |     | EF1 $\alpha$      |        |            |                |            |          |
|-------------------------------------------|---------|----|---------|------|-------------|-----|-------------------|--------|------------|----------------|------------|----------|
|                                           |         |    |         | Exon | Argk Intron | COI | EF1 $\alpha$ Exon | Intron | Opsin Exon | Opsin Intron   | PEPCK Exon | PEPCKI   |
| <i>Bombus caliginosus</i> voucher SC150   | 3256    | 9  | 441     | 530  | 248         | 0   | 529               | 85     | 501        | 101            | 381        | 440      |
| <i>Bombus campestris</i> voucher SC040    | 3727    | 10 | 441     | 530  | 248 (2)     | 480 | 520               | 85     | 501        | 101            | 381        | 440 (37) |
| <i>Bombus centralis</i> voucher SC146     | 3691    | 10 | 441     | 599  | 248         | 366 | 529               | 85     | 501        | 101            | 381        | 440      |
| <i>Bombus chinensis</i> voucher SC152     | 3325    | 9  | 441     | 599  | 248 (1)     | 0   | 529               | 85     | 501        | 101            | 381        | 440 (37) |
| <i>Bombus cingulatus</i> voucher SC212    | 3647    | 10 | 441     | 530  | 248         | 480 | 529               | 85     | 501        | 101            | 381        | 351      |
| <i>Bombus citrinus</i> voucher SC170      | 3736    | 10 | 441     | 530  | 248 (53)    | 480 | 529               | 85     | 501        | 101            | 381        | 440 (37) |
| <i>Bombus coccineus</i> voucher SC137     | 3325    | 9  | 441     | 599  | 248 (17)    | 0   | 529               | 85     | 501        | 101            | 381        | 440      |
| <i>Bombus confusus</i> voucher SC083      | 3805    | 10 | 441     | 599  | 248 (173)   | 480 | 529               | 85     | 501        | 101            | 381        | 440      |
| <i>Bombus consobrinus</i> voucher SC261   | 3736    | 10 | 441     | 530  | 248 (1)     | 480 | 529               | 85     | 501        | 101            | 381        | 440      |
| <i>Bombus convexus</i> voucher SC109      | 3189    | 9  | 441     | 539  | 248 (12)    | 0   | 529               | 85     | 501        | 101            | 348        | 397      |
| <i>Bombus cornutus</i> voucher SC271      | 2930    | 9  | 441     | 539  | 248 (1)     | 0   | 529               | 85     | 234        | 33             | 381        | 440 (37) |
| <i>Bombus crotchii</i> voucher SC071      | 3256    | 9  | 441     | 530  | 248 (17)    | 0   | 529               | 85     | 501        | 101            | 381        | 440      |
| <i>Bombus cryptarum</i> voucher SC127     | 3805    | 10 | 441     | 599  | 248         | 480 | 529               | 85     | 501        | 101            | 381        | 440 (40) |
| <i>Bombus dahlbomii</i> voucher SC016     | 3460    | 10 | 441     | 530  | 248 (1)     | 204 | 529               | 85     | 501        | 101            | 381        | 440      |
| <i>Bombus defector</i> J3                 | 3729    | 10 | 441     | 530  | 248 (12)    | 480 | 529               | 85     | 501        | 101            | 381        | 433      |
| <i>Bombus deuteronymus</i> voucher SC147  | 3655    | 10 | 441     | 530  | 248 (3)     | 480 | 529               | 83     | 501        | 101            | 381        | 361 (4)  |
| <i>Bombus difficillimus</i> voucher SC154 | 3325    | 9  | 441     | 599  | 248 (1)     | 0   | 529               | 85     | 501        | 101            | 381        | 440      |
| <i>Bombus digressus</i> voucher SC307     | 3148    | 9  | 441     | 539  | 248 (26)    | 0   | 529               | 85     | 473        | 101 (4 'N', 2) | 381        | 351 (1)  |
| <i>Bombus diligens</i> voucher SC171      | 3777    | 10 | 441     | 599  | 248 (24)    | 480 | 529               | 85     | 473        | 101 (1 'N', 2) | 381        | 440      |
| <i>Bombus distinguendus</i> voucher SC197 | 3748    | 10 | 441     | 599  | 248 (11)    | 423 | 529               | 85     | 501        | 101            | 381        | 440 (11) |
| <i>Bombus diversus</i> voucher SC120      | 3736    | 10 | 441 (2) | 530  | 248 (1)     | 480 | 529               | 85     | 501        | 101            | 381        | 440      |
| <i>Bombus ecuadorius</i> voucher SC135    | 3325    | 9  | 441     | 599  | 248 (17)    | 0   | 529               | 85     | 501        | 101            | 381        | 440 (5)  |
| <i>Bombus ephippiatus</i> voucher SC198   | 3649    | 10 | 441 (1) | 599  | 248 (78)    | 324 | 529               | 85     | 501        | 101            | 381        | 440      |
| <i>Bombus erzurumensis</i> voucher SC126  | 3796    | 10 | 441     | 599  | 248         | 471 | 529               | 85     | 501        | 101            | 381        | 440      |
| <i>Bombus excellens</i> voucher SC308     | 3717    | 10 | 441     | 539  | 248 (1)     | 480 | 529               | 85     | 473        | 101 (2)        | 381        | 440      |
| <i>Bombus exil</i> voucher SC232          | 3245    | 9  | 441     | 539  | 248 (49)    | 0   | 529               | 85     | 501        | 101            | 361        | 440      |

| Taxon                                       | TL (pb) | N  | 16S     | Argk        |                | COI     | EF1α      |        |            |              |            |             |
|---------------------------------------------|---------|----|---------|-------------|----------------|---------|-----------|--------|------------|--------------|------------|-------------|
|                                             |         |    |         | Exon        | Argk Intron    |         | EF1α Exon | Intron | Opsin Exon | Opsin Intron | PEPCK Exon | PEPCKI      |
| <i>Bombus eximius</i> voucher SC049         | 3805    | 10 | 441     | 599         | 248            | 480     | 529       | 85     | 501        | 101          | 381        | 440         |
| <i>Bombus fernaldae</i> voucher SC088       | 3733    | 10 | 441     | 530         | 248 (2)        | 477     | 529       | 85     | 501        | 101          | 381        | 440 (37)    |
| <i>Bombus fervidus</i> voucher SC309        | 3736    | 10 | 441     | 530         | 248 (1 'N', 1) | 480     | 529       | 85     | 501        | 101          | 381        | 440         |
| <i>Bombus festivus</i> voucher SC104        | 3325    | 9  | 441 (1) | 599         | 248            | 0       | 529       | 85     | 501        | 101          | 381        | 440         |
| <i>Bombus filchnerae</i> voucher SC206      | 3325    | 9  | 441     | 599         | 248 (1)        | 0       | 529       | 85     | 501        | 101          | 381        | 440 (4)     |
| <i>Bombus flavescens</i> voucher SC181      | 3736    | 10 | 441     | 530         | 248            | 480     | 529       | 85     | 501        | 101          | 381        | 440         |
| <i>Bombus flavidus</i> voucher SC041        | 3796    | 10 | 441     | 599         | 248 (2)        | 471     | 529       | 85     | 501        | 101          | 381        | 440 (37)    |
| <i>Bombus flavifrons</i> voucher SC095      | 3736    | 10 | 441     | 530         | 248            | 480     | 529       | 85     | 501        | 101          | 381        | 440         |
| <i>Bombus formosellus</i> J2                | 2474    | 7  | 0       | 530         | 248            | 480     | 529       | 85     | 501        | 101          | 0          | 0           |
| <i>Bombus fragrans</i> voucher SC061        | 3325    | 9  | 441     | 599         | 248 (1)        | 0       | 529       | 85     | 501        | 101          | 381        | 440         |
| <i>Bombus franklini</i> voucher SC256       | 3781    | 10 | 417     | 599         | 248            | 480     | 529       | 85     | 501        | 101          | 381        | 440 (40)    |
| <i>Bombus fraternus</i> voucher SC183       | 3736    | 10 | 441 (1) | 530         | 248 (17)       | 480     | 529       | 85     | 501        | 101          | 381        | 440         |
| <i>Bombus frigidus</i> voucher SC185        | 3803    | 10 | 441     | 597 (2 'N') | 248            | 480     | 529       | 85     | 501        | 101          | 381        | 440         |
| <i>Bombus friseanus</i> voucher SC105       | 3325    | 9  | 441     | 599         | 248            | 0       | 529       | 85     | 501        | 101          | 381        | 440         |
|                                             |         |    |         |             |                | 480 (30 |           |        |            |              |            |             |
| <i>Bombus funebris</i> voucher SC128        | 3795    | 10 | 431     | 599         | 248 (17)       | 'N')    | 529       | 85     | 501        | 101          | 381        | 440 (1)     |
| <i>Bombus funerarius</i> voucher SC270      | 3744    | 10 | 441     | 599         | 248 (1)        | 419     | 529       | 85     | 501        | 101          | 381        | 440 (13)    |
| <i>Bombus gerstaeckeri</i> voucher SC065    | 3802    | 10 | 441     | 599         | 248 (1)        | 477     | 529       | 85     | 501        | 101          | 381        | 440         |
| <i>Bombus grahami</i> voucher SC273         | 3499    | 10 | 441     | 519         | 248            | 372     | 529       | 85     | 501        | 101          | 348        | 355 (4 'N') |
| <i>Bombus griseocollis</i> voucher SC082    | 3256    | 9  | 441     | 530         | 248 (17)       | 0       | 529       | 85     | 501        | 101          | 381        | 440         |
| <i>Bombus haematurus</i> voucher SC211      | 1373    | 5  | 441     | 0           | 0              | 0       | 529       | 85     | 0          | 0            | 201        | 117         |
| <i>Bombus haemorrhoidalis</i> voucher SC191 | 3697    | 10 | 441     | 491         | 248 (1 'N', 1) | 480     | 529       | 85     | 501        | 101          | 381        | 440         |
| <i>Bombus handlirschi</i> voucher SC132     | 3211    | 9  | 441     | 539         | 248 (17)       | 0       | 529       | 85     | 501        | 101          | 351        | 416 (4)     |
| <i>Bombus handlirschianus</i> voucher SC087 | 3265    | 9  | 441     | 539         | 248 (16)       | 0       | 529       | 85     | 501        | 101          | 381        | 440         |
| <i>Bombus hedinii</i> voucher SC129         | 3325    | 9  | 441     | 599         | 248 (6)        | 0       | 529       | 85     | 501        | 101          | 381        | 440 (4)     |
| <i>Bombus honshuensis</i> J7                | 2474    | 7  | 0       | 530         | 248 (6)        | 480     | 529       | 85     | 501        | 101          | 0          | 0           |

| Taxon                                              | TL (pb) | N  | 16S | Argk |             |             | EF1α      |        |            |              |            |          |
|----------------------------------------------------|---------|----|-----|------|-------------|-------------|-----------|--------|------------|--------------|------------|----------|
|                                                    |         |    |     | Exon | Argk Intron | COI         | EF1α Exon | Intron | Opsin Exon | Opsin Intron | PEPCK Exon | PEPCKI   |
| <i>Bombus hortorum</i> voucher SC005               | 3736    | 10 | 441 | 530  | 248 (1)     | 480         | 529       | 85     | 501        | 101          | 381        | 440      |
| <i>Bombus hortulanus</i> voucher SC200             | 3325    | 9  | 441 | 599  | 248 (17)    | 0           | 529       | 85     | 501        | 101          | 381        | 440 (5)  |
| <i>Bombus humilis</i> voucher SC056                | 3724    | 10 | 441 | 599  | 248 (3)     | 480         | 529       | 83     | 501        | 101          | 381        | 361 (4)  |
| <i>Bombus huntii</i> voucher SC151                 | 3580    | 10 | 441 | 530  | 248 (78)    | 324         | 529       | 85     | 501        | 101          | 381        | 440      |
| <i>Bombus hyperboreus</i> voucher SC070            | 3796    | 10 | 441 | 599  | 248 (6)     | 471         | 529       | 85     | 501        | 101          | 381        | 440      |
| <i>Bombus hypnorum</i> voucher SC078               | 3701    | 10 | 441 | 530  | 248         | 471         | 529       | 85     | 501        | 101          | 355        | 440      |
| <i>Bombus hypnorum</i> voucher SC207               | 3796    | 10 | 432 | 599  | 248         | 480         | 529       | 85     | 501        | 101          | 381        | 440      |
| <i>Bombus hypocrita</i> voucher SC123              | 3736    | 10 | 441 | 530  | 248         | 480         | 529       | 85     | 501        | 101          | 381        | 440 (40) |
| <i>Bombus ignitus</i> voucher SC096                | 3736    | 10 | 441 | 530  | 248         | 480         | 529       | 85     | 501        | 101          | 381        | 440 (49) |
| <i>Bombus imitator</i> voucher SC028               | 3325    | 9  | 441 | 599  | 248 (1)     | 0           | 529       | 85     | 501        | 101          | 381        | 440 (30) |
| <i>Bombus impatiens</i> voucher SC060              | 3714    | 10 | 441 | 530  | 248 (78)    | 480         | 529       | 85     | 501        | 101          | 359        | 440      |
| <i>Bombus impetuosus</i> voucher SC284             | 3304    | 9  | 441 | 578  | 248 (6)     | 0           | 529       | 85     | 501        | 101          | 381        | 440 (46) |
| <i>Bombus incertus</i> voucher SC086               | 3736    | 10 | 441 | 539  | 248         | 471         | 529       | 85     | 501        | 101          | 381        | 440      |
| <i>Bombus inexpectatus</i> B05                     | 3042    | 9  | 411 | 509  | 248 (1)     | 0           | 529       | 85     | 459        | 101          | 348        | 352 (46) |
| <i>Bombus infirmus</i> voucher SC157               | 3315    | 9  | 441 | 599  | 248 (26)    | 0           | 529       | 85     | 501        | 101          | 381        | 430      |
| <i>Bombus infrequens</i> voucher SC140             | 3325    | 9  | 441 | 599  | 248         | 0           | 529       | 85     | 501        | 101          | 381        | 440      |
| <i>Bombus insularis</i> voucher SC162              | 3736    | 10 | 441 | 530  | 248 (53)    | 480 (1 'N') | 529       | 85     | 501        | 101          | 381        | 440 (37) |
| <i>Bombus jonellus</i> voucher SC079               | 3805    | 10 | 441 | 599  | 248         | 480         | 529       | 85     | 501        | 101          | 381        | 440      |
| <i>Bombus kashmirensis</i> voucher SC121           | 3324    | 9  | 441 | 598  | 248         | 0           | 529       | 85     | 501        | 101          | 381        | 440      |
| <i>Bombus keriensis</i> voucher SC114              | 3325    | 9  | 441 | 599  | 248         | 0           | 529       | 85     | 501        | 101          | 381        | 440      |
| <i>Bombus koreanus</i> voucher SC277               | 3736    | 10 | 441 | 530  | 248 (1)     | 480         | 529       | 85     | 501        | 101          | 381        | 440      |
| <i>Bombus kulingensis</i> voucher SC097            | 3691    | 10 | 441 | 539  | 248 (1)     | 434         | 521       | 85     | 501        | 101          | 381        | 440      |
| <i>Bombus ladakhensis</i> voucher SC158            | 3319    | 9  | 441 | 599  | 248         | 0           | 523       | 85     | 501        | 101          | 381        | 440      |
| <i>Bombus laesus</i> voucher SC052                 | 3792    | 10 | 441 | 599  | 248 (1)     | 480         | 529       | 85     | 501        | 101          | 369        | 439 (77) |
| <i>Bombus lapidarius caucasicus</i> voucher L084TR | 2508    | 7  | 0   | 0    | 0           | 471         | 529       | 85     | 501        | 101          | 381        | 440      |
| <i>Bombus lapidarius</i> voucher SC006             | 3736    | 10 | 441 | 530  | 248         | 480         | 529       | 85     | 501        | 101          | 381        | 440      |

| Taxon                                     | TL (pb) | N  | 16S     | Argk |             | COI         | EF1α      |        |             |                |            |          |
|-------------------------------------------|---------|----|---------|------|-------------|-------------|-----------|--------|-------------|----------------|------------|----------|
|                                           |         |    |         | Exon | Argk Intron |             | EF1α Exon | Intron | Opsin Exon  | Opsin Intron   | PEPCK Exon | PEPCKI   |
| <i>Bombus lapponicus</i> voucher SC103    | 3804    | 10 | 441     | 599  | 248 (78)    | 480         | 528       | 85     | 501         | 101            | 381        | 440      |
| <i>Bombus lemnicatus</i> voucher SC161    | 3288    | 9  | 441     | 599  | 248 (22)    | 0           | 529       | 85     | 501         | 101            | 358        | 426      |
| <i>Bombus lepidus</i> voucher SC155       | 3325    | 9  | 441     | 599  | 248 (22)    | 0           | 529       | 85     | 501         | 101            | 381        | 440      |
| <i>Bombus longipes</i> voucher SC194      | 3805    | 10 | 441 (2) | 599  | 248 (1)     | 480         | 529       | 85     | 501         | 101            | 381        | 440 (6)  |
| <i>Bombus lucorum</i> voucher SC184       | 3805    | 10 | 441     | 599  | 248         | 480         | 529       | 85     | 501         | 101            | 381        | 440 (40) |
| <i>Bombus lucorum</i> voucher SC217       | 3729    | 10 | 441     | 530  | 248         | 473         | 529       | 85     | 501         | 101            | 381        | 440 (40) |
| <i>Bombus macgregori</i> voucher SC231    | 3325    | 9  | 441     | 599  | 248 (17)    | 0           | 529       | 85     | 501         | 101            | 381        | 440      |
| <i>Bombus maxillosus</i> voucher SC074    | 3325    | 9  | 441     | 599  | 248 (1)     | 0           | 529       | 85     | 501         | 101            | 381        | 440 (37) |
|                                           |         |    |         |      |             | 480 (24     |           |        |             |                |            |          |
| <i>Bombus medius</i> voucher SC222        | 3717    | 10 | 441     | 539  | 248 (6)     | 'N')        | 529       | 85     | 473         | 101 (3 'N', 2) | 381        | 440      |
| <i>Bombus melaleucus</i> voucher SC173    | 3265    | 9  | 441     | 539  | 248 (18)    | 0           | 529       | 85     | 501         | 101            | 381        | 440 (5)  |
| <i>Bombus melanopygus</i> voucher SC215   | 3736    | 10 | 441     | 530  | 248 (78)    | 480         | 529       | 85     | 501         | 101            | 381        | 440      |
| <i>Bombus melanurus</i> voucher SC022     | 3647    | 10 | 441     | 530  | 248 (1)     | 480         | 529       | 85     | 501         | 101            | 381        | 351      |
| <i>Bombus mendax</i> voucher SC019        | 3730    | 10 | 441     | 530  | 248 (12)    | 480         | 523       | 85     | 501         | 101            | 381        | 440      |
| <i>Bombus mesomelas</i> voucher SC037     | 3805    | 10 | 441     | 599  | 248 (1)     | 480         | 529       | 85     | 501         | 101            | 381        | 440      |
| <i>Bombus mexicanus</i> voucher SC220     | 3432    | 10 | 441     | 527  | 248 (6)     | 207         | 529       | 85     | 473         | 101 (3 'N', 2) | 381        | 440      |
| <i>Bombus miniatus</i> voucher SC244      | 3265    | 9  | 441     | 539  | 248         | 0           | 529       | 85     | 501         | 101            | 381        | 440      |
| <i>Bombus mixtus</i> voucher SC024        | 3715    | 10 | 441     | 530  | 248         | 459         | 529       | 85     | 501         | 101            | 381        | 440      |
| <i>Bombus mlokosievtzii</i> voucher SC081 | 3325    | 9  | 441     | 599  | 248 (1)     | 0           | 529       | 85     | 501         | 101            | 381        | 440 (46) |
| <i>Bombus moderatus</i> voucher SC163     | 3805    | 10 | 441     | 599  | 248         | 480 (1 'N') | 529       | 85     | 501         | 101            | 381        | 440 (40) |
| <i>Bombus modestus</i> voucher SC160      | 3805    | 10 | 441     | 599  | 248         | 480         | 529       | 85     | 501         | 101            | 381        | 440      |
| <i>Bombus modestus</i> voucher SC238      | 3805    | 10 | 441 (1) | 599  | 248         | 480         | 529       | 85     | 501         | 101            | 381        | 440      |
| <i>Bombus monticola</i> voucher SC176     | 3805    | 10 | 441     | 599  | 248 (78)    | 480         | 529       | 85     | 501         | 101            | 381        | 440      |
| <i>Bombus morio</i> B13                   | 3548    | 10 | 441     | 537  | 248 (1)     | 435         | 529       | 85     | 473         | 101            | 348        | 351 (1)  |
| <i>Bombus morio</i> voucher SC310         | 3732    | 10 | 441     | 599  | 248 (1)     | 435         | 529       | 85     | 473 (1 'N') | 101 (2)        | 381        | 440      |
| <i>Bombus morrisoni</i> voucher SC196     | 3325    | 9  | 441     | 599  | 248 (17)    | 0           | 529       | 85     | 501         | 101            | 381        | 440      |

| Taxon                                      | TL (pb) | N  | 16S | Argk |             | COI | EF1a      |        |            |                |            |              |
|--------------------------------------------|---------|----|-----|------|-------------|-----|-----------|--------|------------|----------------|------------|--------------|
|                                            |         |    |     | Exon | Argk Intron |     | EF1a Exon | Intron | Opsin Exon | Opsin Intron   | PEPCK Exon | PEPCKI       |
| <i>Bombus mucidus</i> voucher SC059        | 3641    | 10 | 441 | 530  | 248 (1)     | 395 | 519       | 85     | 501        | 101            | 381        | 440 (4)      |
| <i>Bombus muscorum</i> voucher SC033       | 3796    | 10 | 441 | 599  | 248 (1)     | 471 | 529       | 85     | 501        | 101            | 381        | 440 (4)      |
| <i>Bombus neoboreus</i> voucher SC188      | 3325    | 9  | 441 | 599  | 248 (6)     | 0   | 529       | 85     | 501        | 101            | 381        | 440          |
| <i>Bombus nevadensis</i> voucher SC139     | 3324    | 10 | 441 | 428  | 248         | 204 | 529       | 85     | 501        | 101 (11)       | 357        | 430 (6)      |
| <i>Bombus niveatus</i> voucher SC093       | 3224    | 9  | 441 | 599  | 248         | 0   | 529       | 84     | 501        | 90             | 381        | 351          |
| <i>Bombus nobilis</i> voucher SC098        | 3325    | 9  | 441 | 599  | 248         | 0   | 529       | 85     | 501        | 101            | 381        | 440          |
| <i>Bombus norvegicus</i> voucher SC089     | 3778    | 10 | 441 | 599  | 248 (2)     | 453 | 529       | 85     | 501        | 101            | 381        | 440 (37)     |
| <i>Bombus oberti</i> voucher SC234         | 3316    | 9  | 441 | 599  | 248         | 0   | 529       | 85     | 501        | 92             | 381        | 440 (2)      |
| <i>Bombus occidentalis</i> voucher SC026   | 3778    | 10 | 441 | 599  | 248         | 453 | 529       | 85     | 501        | 101            | 381        | 440 (40)     |
| <i>Bombus opifex</i> voucher SC175         | 3805    | 10 | 441 | 599  | 248 (1)     | 480 | 529       | 85     | 501        | 101            | 381        | 440          |
| <i>Bombus parthenius</i> voucher SC241     | 3265    | 9  | 441 | 539  | 248         | 0   | 529       | 85     | 501        | 101            | 381        | 440          |
| <i>Bombus pascuorum</i> voucher SC023      | 3736    | 10 | 441 | 530  | 248 (5)     | 480 | 529       | 85     | 501        | 101            | 381        | 440 (4)      |
| <i>Bombus patagiatus</i> voucher SC111     | 3736    | 10 | 441 | 530  | 248         | 480 | 529       | 85     | 501        | 101            | 381        | 440 (40)     |
| <i>Bombus pauloensis</i> 77202             | 2767    | 8  | 441 | 0    | 0           | 448 | 529       | 85     | 473        | 101            | 348        | 342 (1)      |
| <i>Bombus pauloensis</i> voucher SC305     | 3670    | 10 | 441 | 539  | 248 (6)     | 435 | 527       | 85     | 473        | 101 (1 'N', 2) | 381        | 440          |
| <i>Bombus pennsylvanicus</i> voucher SC311 | 3322    | 9  | 441 | 599  | 248 (1)     | 0   | 529       | 85     | 501        | 101            | 381        | 437          |
| <i>Bombus pennsylvanicus</i> voucher SC317 | 3805    | 10 | 441 | 599  | 248 (1)     | 480 | 529       | 85     | 501        | 101            | 381        | 440          |
| <i>Bombus perplexus</i> voucher SC166      | 3736    | 10 | 441 | 530  | 248         | 480 | 529       | 85     | 501        | 101            | 381        | 440          |
| <i>Bombus persicus</i> voucher SC054       | 3273    | 9  | 441 | 573  | 248 (15)    | 0   | 527       | 85     | 501        | 101            | 359        | 438          |
| <i>Bombus personatus</i> voucher SC138     | 3325    | 9  | 441 | 599  | 248 (1)     | 0   | 529       | 85     | 501        | 101            | 381        | 440          |
| <i>Bombus picipes</i> voucher SC180        | 3325    | 9  | 441 | 599  | 248         | 0   | 529       | 85     | 501        | 101            | 381        | 440          |
| <i>Bombus polaris</i> voucher SC223        | 3638    | 10 | 441 | 530  | 248         | 471 | 529       | 85     | 501        | 101            | 381        | 351          |
| <i>Bombus pomorum</i> voucher SC053        | 3325    | 9  | 441 | 599  | 248 (1)     | 0   | 529       | 85     | 501        | 101            | 381        | 440          |
| <i>Bombus portchinsky</i> voucher SC072    | 3767    | 10 | 441 | 599  | 248 (1)     | 480 | 529       | 85     | 501        | 101            | 353        | 430 (12 'N') |
| <i>Bombus potanini</i> voucher SC113       | 3317    | 9  | 441 | 599  | 248 (6)     | 0   | 521       | 85     | 501        | 101            | 381        | 440 (46)     |
| <i>Bombus pratorum</i> voucher SC075       | 3686    | 10 | 441 | 530  | 248         | 480 | 529       | 85     | 501        | 101            | 351        | 420          |

| Taxon                                         | TL (pb) | N  | 16S | Argk        |             | COI         | EF1α      |        |             |                |            |          |
|-----------------------------------------------|---------|----|-----|-------------|-------------|-------------|-----------|--------|-------------|----------------|------------|----------|
|                                               |         |    |     | Exon        | Argk Intron |             | EF1α Exon | Intron | Opsin Exon  | Opsin Intron   | PEPCK Exon | PEPCKI   |
| <i>Bombus pressus</i> voucher SC239           | 1365    | 5  | 441 | 0           | 0           | 0           | 529       | 85     | 0           | 0              | 201        | 109      |
| <i>Bombus pseudobaicalensis</i> voucher SC253 | 3736    | 10 | 441 | 530 (2 'N') | 248 (6)     | 480         | 529       | 85     | 501         | 101            | 381        | 440 (4)  |
| <i>Bombus pullatus</i> voucher SC312          | 3501    | 10 | 441 | 599         | 248 (1)     | 204         | 529       | 85     | 473 (1 'N') | 101 (3 'N', 2) | 381        | 440      |
| <i>Bombus pyrenaeus</i> voucher SC035         | 3805    | 10 | 441 | 599         | 248         | 480         | 529       | 85     | 501         | 101            | 381        | 440      |
| <i>Bombus quadricolor</i> voucher SC090       | 3805    | 10 | 441 | 599         | 248 (2)     | 480         | 529       | 85     | 501         | 101            | 381        | 440 (37) |
| <i>Bombus religiosus</i> voucher SC141        | 3600    | 10 | 441 | 599         | 248 (1)     | 480         | 529       | 85     | 296         | 101            | 381        | 440      |
| <i>Bombus remotus</i> voucher SC192           | 3325    | 9  | 441 | 599         | 248 (6)     | 0           | 529       | 85     | 501         | 101            | 381        | 440 (46) |
| <i>Bombus robustus</i> voucher SC050          | 3469    | 10 | 441 | 539         | 248 (17)    | 204         | 529       | 85     | 501         | 101            | 381        | 440 (5)  |
| <i>Bombus rubicundus</i> voucher SC202        | 3325    | 9  | 441 | 599         | 248 (17)    | 0           | 529       | 85     | 501         | 101 (2)        | 381        | 440      |
| <i>Bombus ruderarius</i> voucher SC047        | 3726    | 10 | 441 | 530         | 248 (1)     | 480         | 519       | 85     | 501         | 101            | 381        | 440 (46) |
| <i>Bombus ruderatus</i> voucher SC018         | 3736    | 10 | 441 | 530         | 248 (1)     | 480         | 529       | 85     | 501         | 101            | 381        | 440      |
| <i>Bombus rufocinctus</i> voucher SC186       | 3705    | 10 | 441 | 530         | 248 (8)     | 449         | 529       | 85     | 501         | 101 (1)        | 381        | 440      |
| <i>Bombus rufofasciatus</i> voucher SC133     | 3296    | 9  | 441 | 599         | 248         | 0           | 529       | 85     | 501         | 101            | 352        | 440      |
| <i>Bombus rupestris</i> voucher SC009         | 3736    | 10 | 441 | 530         | 248 (1)     | 480         | 529       | 85     | 501         | 101            | 381        | 440 (37) |
| <i>Bombus sandersoni</i> voucher SC255        | 3782    | 10 | 418 | 599         | 248         | 480 (4 'N') | 529       | 85     | 501         | 101            | 381        | 440      |
| <i>Bombus schrencki</i> voucher SC298         | 3691    | 10 | 412 | 530         | 248 (6)     | 480         | 513       | 85     | 501         | 101            | 381        | 440 (4)  |
| <i>Bombus securus</i> voucher SC142           | 3805    | 10 | 441 | 599         | 248 (1)     | 480         | 529       | 85     | 501         | 101            | 381        | 440      |
| <i>Bombus semenoviellus</i> voucher SC236     | 3805    | 10 | 441 | 599         | 248 (32)    | 480         | 529       | 85     | 501         | 101            | 381        | 440      |
| <i>Bombus shaposhnikovi</i> voucher SC099     | 3265    | 9  | 441 | 539         | 248 (16)    | 0           | 529       | 85     | 501         | 101            | 381        | 440      |
| <i>Bombus sibiricus</i> voucher SC274         | 3705    | 10 | 441 | 599         | 248         | 480         | 529       | 85     | 501         | 90             | 381        | 351      |
| <i>Bombus sichelii</i> voucher SC034          | 3420    | 10 | 441 | 599         | 248         | 480         | 529       | 85     | 196         | 21             | 381        | 440      |
| <i>Bombus simillimus</i> voucher SC243        | 3324    | 9  | 441 | 599         | 248         | 0           | 529       | 85     | 501         | 101            | 380        | 440      |
| <i>Bombus sitkensis</i> voucher SC144         | 3325    | 9  | 441 | 599         | 248 (7)     | 0           | 529       | 85     | 501         | 101            | 381        | 440      |
| <i>Bombus skorikovi</i> voucher SC159         | 3325    | 9  | 441 | 599         | 248 (2)     | 0           | 529       | 85     | 501         | 101            | 381        | 440 (37) |
| <i>Bombus sonani</i> J6                       | 2474    | 7  | 0   | 530         | 248         | 480         | 529       | 85     | 501         | 101            | 0          | 0        |
| <i>Bombus sonorus</i> voucher SC051           | 3315    | 9  | 431 | 599         | 248 (1)     | 0           | 529       | 85     | 501         | 101            | 381        | 440      |

| Taxon                                     | TL (pb) | N  | 16S         | Argk |                | COI | EF1α      |        |            |                |            |          |
|-------------------------------------------|---------|----|-------------|------|----------------|-----|-----------|--------|------------|----------------|------------|----------|
|                                           |         |    |             | Exon | Argk Intron    |     | EF1α Exon | Intron | Opsin Exon | Opsin Intron   | PEPCK Exon | PEPCKI   |
| <i>Bombus sonorus</i> voucher SC318       | 3297    | 9  | 441 (1)     | 599  | 248 (1)        | 0   | 529       | 85     | 473        | 101 (1 'N', 2) | 381        | 440      |
| <i>Bombus soroensis</i> voucher SC136     | 3736    | 10 | 441         | 530  | 248            | 480 | 529       | 85     | 501        | 101 (3)        | 381        | 440 (17) |
| <i>Bombus sporadicus</i> voucher SC193    | 3805    | 10 | 441         | 599  | 248 (61)       | 480 | 529       | 85     | 501        | 101            | 381        | 440 (40) |
| <i>Bombus steindachneri</i> voucher SC313 | 3297    | 9  | 441         | 599  | 248 (1 'N', 1) | 0   | 529       | 85     | 473        | 101 (2)        | 381        | 440      |
| <i>Bombus subterraneus</i> voucher SC046  | 3727    | 10 | 441         | 530  | 248 (1)        | 471 | 529       | 85     | 501        | 101            | 381        | 440      |
| <i>Bombus suckleyi</i> voucher SC091      | 3325    | 9  | 441         | 599  | 248 (1)        | 0   | 529       | 85     | 501        | 101            | 381        | 440 (37) |
| <i>Bombus sulfureus</i> voucher SC064     | 3219    | 9  | 441         | 594  | 248            | 0   | 529       | 84     | 501        | 90             | 381        | 351      |
| <i>Bombus superbus</i> B02                | 1857    | 5  | 441         | 0    | 0              | 0   | 0         | 0      | 501        | 101            | 381        | 433      |
| <i>Bombus supremus</i> voucher SC101      | 3805    | 10 | 441         | 599  | 248 (1)        | 480 | 529       | 85     | 501        | 101            | 381        | 440      |
| <i>Bombus sushkini</i> voucher SC143      | 3736    | 10 | 441         | 530  | 248 (1)        | 480 | 529       | 85     | 501        | 101            | 381        | 440      |
| <i>Bombus sylvarum</i> voucher SC110      | 3769    | 10 | 441         | 599  | 248 (1)        | 480 | 529       | 85     | 501        | 101            | 348        | 437 (44) |
| <i>Bombus sylvestris</i> voucher SC020    | 3757    | 10 | 441 (1 'N') | 599  | 248 (2)        | 480 | 516       | 85     | 466        | 101            | 381        | 440 (37) |
| <i>Bombus sylvicola</i> voucher SC108     | 3775    | 10 | 441         | 599  | 248 (78)       | 477 | 529       | 85     | 501        | 101            | 354        | 440      |
| <i>Bombus ternarius</i> voucher SC116     | 3736    | 10 | 441         | 530  | 248 (78)       | 480 | 529       | 85     | 501        | 101            | 381        | 440      |
| <i>Bombus terrestris</i> voucher SC003    | 3736    | 10 | 441         | 530  | 248            | 480 | 529       | 85     | 501        | 101            | 381        | 440 (47) |
| <i>Bombus terricola</i> voucher SC205     | 3736    | 10 | 441         | 530  | 248            | 480 | 529       | 85     | 501        | 101            | 381        | 440 (40) |
| <i>Bombus tibetanus</i> voucher SC134     | 3325    | 9  | 441         | 599  | 248 (1)        | 0   | 529       | 85     | 501        | 101            | 381        | 440 (37) |
| <i>Bombus tichenkoi</i> J1                | 2474    | 7  | 0           | 530  | 248 (1)        | 480 | 529       | 85     | 501        | 101            | 0          | 0        |
| <i>Bombus transversalis</i> voucher SC314 | 3777    | 10 | 441         | 599  | 248 (6)        | 480 | 529       | 85     | 473        | 101 (3 'N', 2) | 381        | 440      |
| <i>Bombus tricornis</i> voucher SC148     | 3736    | 10 | 441 (1)     | 530  | 248            | 480 | 529       | 85     | 501        | 101            | 381        | 440      |
| <i>Bombus trifasciatus</i> voucher SC015  | 3686    | 10 | 441 (2)     | 530  | 248 (1)        | 434 | 525       | 85     | 501        | 101            | 381        | 440      |
| <i>Bombus trinominatus</i> voucher SC229  | 3325    | 9  | 441         | 599  | 248 (60)       | 0   | 529       | 85     | 501        | 101            | 381        | 440      |
| <i>Bombus tucumanus</i> voucher SC276     | 3325    | 9  | 441         | 599  | 248 (17)       | 0   | 529       | 85     | 501        | 101            | 381        | 440 (5)  |
| <i>Bombus turkestanicus</i> B03           | 1857    | 5  | 441         | 0    | 0              | 0   | 0         | 0      | 501        | 101            | 381        | 433      |
| <i>Bombus ussurensis</i> voucher SC130    | 3656    | 10 | 412 (2)     | 530  | 248 (1)        | 480 | 529       | 85     | 501        | 101            | 350        | 420 (6)  |
| <i>Bombus vagans</i> voucher SC044        | 3788    | 10 | 424         | 599  | 248            | 480 | 529       | 85     | 501        | 101            | 381        | 440      |

| Taxon                                     | TL (pb) | N  | 16S      | Argk        |             | COI         | EF1α        |            |             |                |            |          |
|-------------------------------------------|---------|----|----------|-------------|-------------|-------------|-------------|------------|-------------|----------------|------------|----------|
|                                           |         |    |          | Exon        | Argk Intron |             | EF1α Exon   | Intron     | Opsin Exon  | Opsin Intron   | PEPCK Exon | PEPCKI   |
| <i>Bombus vandykei</i> voucher SC149      | 3675    | 10 | 441      | 530         | 248         | 419         | 529         | 85         | 501         | 101 (1 'N')    | 381        | 440      |
| <i>Bombus variabilis</i> voucher SC316    | 3297    | 9  | 441      | 599         | 248 (1)     | 0           | 529         | 85         | 473         | 101 (3 'N', 2) | 381        | 440 (37) |
| <i>Bombus velox</i> voucher SC094         | 3252    | 9  | 441      | 526         | 248 (1)     | 0           | 529         | 85         | 501         | 101            | 381        | 440 (46) |
| <i>Bombus vestalis</i> voucher SC169      | 3805    | 10 | 441      | 599         | 248 (1)     | 480         | 529         | 85         | 501         | 101            | 381        | 440 (37) |
| <i>Bombus veteranus</i> voucher SC187     | 3805    | 10 | 441      | 599         | 248 (6)     | 480         | 529         | 85         | 501         | 101            | 381        | 440 (46) |
| <i>Bombus vogti</i> voucher SC172         | 3325    | 9  | 441      | 599         | 248 (17)    | 0           | 529         | 85         | 501         | 101            | 381        | 440 (5)  |
| <i>Bombus volucelloides</i> voucher SC122 | 2435    | 7  | 441      | 530         | 248 (18)    | 0           | 529         | 85         | 501         | 101            | 0          | 0        |
| <i>Bombus vorticosus</i> voucher SC124    | 3158    | 9  | 441      | 533         | 248         | 0           | 529         | 84         | 501         | 90             | 381        | 351      |
| <i>Bombus vosnesenskii</i> voucher SC112  | 3580    | 10 | 441      | 530         | 248 (78)    | 324         | 529         | 85         | 501         | 101            | 381        | 440      |
| <i>Bombus waltoni</i> voucher SC102       | 3716    | 10 | 441      | 539         | 248 (12)    | 480         | 529         | 85         | 501         | 101            | 352        | 440      |
| <i>Bombus weisi</i> voucher SC315         | 3500    | 10 | 441      | 599         | 248 (89)    | 203         | 529         | 85         | 473 (1 'N') | 101 (3 'N', 2) | 381        | 440      |
| <i>Bombus wilmattae</i> voucher SC199     | 3649    | 10 | 441      | 599         | 248 (78)    | 324         | 529         | 85         | 501         | 101            | 381        | 440      |
| <i>Bombus wurflenii</i> voucher SC001     | 3670    | 10 | 441      | 530         | 248         | 414         | 529         | 85 (1 'N') | 501         | 101            | 381        | 440      |
| <i>Bombus zonatus</i> voucher SC063       | 3325    | 9  | 441      | 599         | 248 (17)    | 0           | 529         | 85         | 501         | 101            | 381        | 440 (46) |
| <i>Eufriesea pulchra</i>                  | 1634    | 4  | 0        | 530         | 0           | 0           | 529         | 85         | 490         | 0              | 0          | 0        |
| <i>Eufriesea surinamensis</i>             | 2175    | 5  | 0        | 583         | 0           | 480         | 526         | 85         | 501         | 0              | 0          | 0        |
| <i>Euglossa championi</i>                 | 2579    | 6  | 416 (10) | 582         | 0           | 480         | 529         | 85         | 487         | 0              | 0          | 0        |
| <i>Euglossa imperialis</i>                | 2425    | 6  | 383 (1)  | 467         | 0           | 460         | 529         | 85         | 501         | 0              | 0          | 0        |
| <i>Eulaema boliviensis</i>                | 2983    | 7  | 441 (2)  | 599         | 0           | 480         | 529         | 85         | 501         | 0              | 348        | 0        |
| <i>Eulaema nigrita</i>                    | 2440    | 6  | 416 (5)  | 474 (2 'N') | 0           | 480 (1 'N') | 498         | 85         | 487         | 0              | 0          | 0        |
| <i>Geniotrigona thoracica</i>             | 2423    | 6  | 441 (1)  | 556         | 0           | 0           | 494 (5 'N') | 85         | 475         | 0              | 372        | 0        |
| <i>Heterotrigona itama</i>                | 2408    | 6  | 441 (2)  | 539         | 0           | 0           | 506         | 85         | 486         | 0              | 351        | 0        |
|                                           |         |    |          |             |             |             | 528 (1 'N', |            |             |                |            |          |
| <i>Hypotrigona gribodoi</i>               | 2396    | 6  | 441      | 539         | 0           | 0           | 3)          | 85 (1)     | 442         | 0              | 361        | 0        |
| <i>Liotrigona mahafalya</i>               | 2516    | 6  | 441      | 539         | 0           | 480         | 529 (1 'N') | 85 (1)     | 442 (1 'N') | 0              | 0          | 0        |
| <i>Plebeia frontalis</i>                  | 2413    | 6  | 441      | 539         | 0           | 0           | 529         | 85 (1)     | 442         | 0              | 377        | 0        |



| Taxon                      | TL (pb) | N | 16S     | Argk |             |     | EF1α      |        |            |              |            |        |
|----------------------------|---------|---|---------|------|-------------|-----|-----------|--------|------------|--------------|------------|--------|
|                            |         |   |         | Exon | Argk Intron | COI | EF1α Exon | Intron | Opsin Exon | Opsin Intron | PEPCK Exon | PEPCKI |
| <i>Trigona amazonensis</i> | 2463    | 6 | 441 (2) | 530  | 0           | 0   | 529       | 85 (1) | 501        | 0            | 377 (3)    | 0      |

Table S11. Best partitioning schemes and substitution models.

| Subset | Best Model | Subset Partitions                       | Subset Sites                         |
|--------|------------|-----------------------------------------|--------------------------------------|
| 1      | GTR+I+G    | 16S                                     | 1-441                                |
| 2      | GTR+I+G    | Argk exon 1, EF1α exon 1                | 442-1040\3, 1769-2297\3              |
| 3      | GTR+I+G    | EF1α exon2, Opsin exon2, Argk exon2     | 1770-2297\3, 2384-2883\3, 443-1040\3 |
| 4      | SYM+G      | Argk exon3, Opsin exon3, PEPCK exon     | 444-1040\3, 2385-2883\3, 2987-3365\3 |
| 5      | GTR+G      | Opsin intron, PEPCK intron, Argk intron | 2884-2984, 3366-3805, 1041-1288      |
| 6      | GTR+I+G    | COI1                                    | 1289-1768\3                          |
| 7      | HKY+I+G    | COI2                                    | 1290-1768\3                          |
| 8      | GTR+I+G    | COI3                                    | 1291-1768\3                          |
| 9      | TVM+G      | EF1α exon3                              | 1771-2297\3                          |
| 10     | TVM+G      | EF1α intron                             | 2298-2382                            |
| 11     | K81UF+I+G  | PEPCK exon1, Opsin exon1                | 2985-3365\3, 2383-2883\3             |
| 12     | TRNEF+I+G  | PEPCK exon2                             | 2986-3365\3                          |

## References

1. Goloboff, P.A.; Farris, J.S.; Nixon, K.C. TNT, a Free Program for Phylogenetic Analysis. *Cladistics* **2008**, *24*, 774–786, doi:10.1111/j.1096-0031.2008.00217.x.
2. Stamatakis, A. RAxML Version 8: A Tool for Phylogenetic Analysis and Post-Analysis of Large Phylogenies. *Bioinformatics* **2014**, *30*, 1312–1313, doi:10.1093/bioinformatics/btu033.
3. Lanfear, R.; Calcott, B.; Ho, S.Y.W.; Guindon, S. PartitionFinder: Combined Selection of Partitioning Schemes and Substitution Models for Phylogenetic Analyses. *Mol. Biol. Evol.* **2012**, *29*, 1695–1701, doi:10.1093/molbev/mss020.
4. Nguyen, L.-T.; Schmidt, H.A.; von Haeseler, A.; Minh, B.Q. IQ-TREE: A Fast and Effective Stochastic Algorithm for Estimating Maximum-Likelihood Phylogenies. *Mol. Biol. Evol.* **2015**, *32*, 268–274, doi:10.1093/molbev/msu300.
5. Hoang, D.T.; Chernomor, O.; Haeseler, A. von; Minh, B.Q.; Vinh, L.S. UFBoot2: Improving the Ultrafast Bootstrap Approximation. *Mol. Biol. Evol.* **2018**, *35*, 518–522, doi:10.1093/molbev/msx281.
6. Engel, M.S. The First Fossil *Euglossa* and Phylogeny of the Orchid Bees (Hymenoptera: Apidae; Euglossini). *Am. Mus. Novit.* **1999**, 3272, 1–14.
7. Drummond, A.J.; Ho, S.Y.W.; Phillips, M.J.; Rambaut, A. Relaxed Phylogenetics and Dating with Confidence. *PLoS Biol.* **2006**, *4*, e88, doi:10.1371/journal.pbio.0040088.
8. Engel, M.S. A Giant Honey Bee from the Middle Miocene of Japan (Hymenoptera: Apidae). *Am. Mus. Novit.* **2006**, 3504, 1–12.
9. Engel, M.S. An Orchid Bee of the Genus *Eulaema* in Early Miocene Mexican Amber (Hymenoptera: Apidae). *Novit. Paleontomologicae* **2014**, *7*, 1–15.
10. Poinar Jr, G. *Paleoeuglossa Melissiflora* Gen. n., Sp. n. (Euglossinae: Apidae), Fossil Orchid Bees in Dominican Amber. *J. Kans. Entomol. Soc.* **1998**, 29–34.
11. Engel, M.S.; Grimaldi, D.A.; Gonzalez, V.H.; Hinojosa-Díaz, I.A.; Michener, C.D. An Exomalopsine Bee in Early Miocene Amber from the Dominican Republic (Hymenoptera: Apidae). *Am. Mus. Novit.* **2012**, 1–16.
12. Wappler, T.; De Meulemeester, T.; Murat Aytakin, A.; Michez, D.; Engel, M.S. Geometric Morphometric Analysis of a New Miocene Bumble Bee from the Randeck Maar of Southwestern Germany (Hymenoptera: Apidae). *Syst. Entomol.* **2012**, *37*, 784–792.
13. Antropov, A.V.; Belokobylskij, S.A.; Compton, S.G.; Dlussky, G.M.; Khalaim, A.I.; Kolyada, V.A.; Kozlov, M.A.; Perfilieva, K.S.; Rasnitsyn, A.P. The Wasps, Bees and Ants (Insecta: Vespida=Hymenoptera) from the Insect Limestone (Late Eocene) of the Isle of Wight, UK. *Earth Environ. Sci. Trans. R. Soc. Edinb.* **2014**, *104*, 335–446, doi:10.1017/S1755691014000103.
14. Dehon, M.; Engel, M.S.; Gérard, M.; Aytakin, A.M.; Ghisbain, G.; Williams, P.H.; Rasmont, P.; Michez, D. Morphometric Analysis of Fossil Bumble Bees (Hymenoptera, Apidae, Bombini) Reveals Their Taxonomic Affinities. *ZooKeys* **2019**, 891, 71–118, doi:10.3897/zookeys.891.36027.
15. Michener, C.D.; Grimaldi, D.A. The Oldest Fossil Bee: Apoid History, Evolutionary Stasis, and Antiquity of Social Behavior. *Proceedings Natl. Acad. Sci. U. S. Am.* **1988**, *85*, 6424–6426.
16. Engel, M.S. A New Interpretation of the Oldest Fossil Bee (Hymenoptera: Apidae). *Am. Mus. Novit.* **2000**, 3296, 1–11.
17. Engel, M.S. A Monograph of the Baltic Amber Bees and Evolution of the Apoidea (Hymenoptera). *Bull. Am. Mus. Nat. Hist.* **2001**, 259, 1–192.
18. Prokop, J.; Dehon, M.; Michez, D.; Engel, M.S. An Early Miocene Bumble Bee from Northern Bohemia (Hymenoptera, Apidae). *ZooKeys* **2017**, 710, 43–63, doi:10.3897/zookeys.710.14714.

- 
19. Rabosky, D.L.; Grundler, M.; Anderson, C.; Title, P.; Shi, J.J.; Brown, J.W.; Huang, H.; Larson, J.G. BAMMtools: An R Package for the Analysis of Evolutionary Dynamics on Phylogenetic Trees. *Methods Ecol. Evol.* **2014**, *5*, 701–707, doi:10.1111/2041-210X.12199.
  20. Zachos, J.; Pagani, M.; Sloan, L.; Thomas, E.; Billups, K. Trends, Rhythms, and Aberrations in Global Climate 65 Ma to Present. *Science* **2001**, *292*, 686–693.
  21. Hines, H.M. Historical Biogeography, Divergence Times, and Diversification Patterns of Bumble Bees (Hymenoptera: Apidae: Bombus). *Syst. Biol.* **2008**, *57*, 58–75, doi:10.1080/10635150801898912.
  22. Condamine, F.L.; Hines, H.M. Historical Species Losses in Bumblebee Evolution. *Biol. Lett.* **2015**, *11*, 20141049–20141049, doi:10.1098/rsbl.2014.1049.
  23. Wiens, J.J.; Morrill, M.C. Missing Data in Phylogenetic Analysis: Reconciling Results from Simulations and Empirical Data. *Syst. Biol.* **2011**, *60*, 719–731, doi:10.1093/sysbio/syr025.
