# Supplementary material for: Biogeography and Diversification of Bumblebees (Hymenoptera: Apidae), with Emphasis on Neotropical Species
Source: MDPI journal article supplement (doi:10.3390/d14040238), 2022-03-25
Supplement: s1 [file s1]

**Table S8.** BioGeoBEARS results for each model implemented in the analysis: LnL – log-likelihood values of the run, N – number parameters, d – dispersal rate, e – extinction rate; j – jump dispersal rate, AIC – Akaike Information Criterion and AICc – Corrected Akaike Information Criterion. Best-fitting model in bold. The information of distribution areas used in the analyses followed the available in <http://www.nhm.ac.uk/research-curation/research/projects/bombus> with few modified for the Nearctic, Neotropical and Palaearctic species (see the Figure 1 to the modifications).

| Model                | LnL            | N        | d             | e            | j            | AIC            | AICc           |
|----------------------|----------------|----------|---------------|--------------|--------------|----------------|----------------|
| <b>BAYAREALIKE+J</b> | <b>-505.26</b> | <b>3</b> | <b>0.0013</b> | <b>0.026</b> | <b>0.010</b> | <b>1016.52</b> | <b>1016.63</b> |
| DEC+J                | -569.65        | 3        | 0.0050        | 1.00E-12     | 0.015        | 1145.31        | 1145.42        |
| DIVALIKE+J           | -590.40        | 3        | 0.0058        | 1.00E-12     | 0.014        | 1186.81        | 1186.92        |
| DEC                  | -591.31        | 2        | 0.0059        | 1.00E-12     | 0            | 1186.62        | 1186.68        |
| DIVALIKE             | -609.77        | 2        | 0.0075        | 1.00E-12     | 0            | 1223.55        | 1223.60        |
| BAYAREALIKE          | -686.68        | 2        | 0.01          | 0.01         | 0            | 1377.35        | 1377.41        |
