# Supplementary material for: Biogeography and Diversification of Bumblebees (Hymenoptera: Apidae), with Emphasis on Neotropical Species
Source: MDPI journal article supplement (doi:10.3390/d14040238), 2022-03-25
Supplement: s1 [file s1]

**Table S5.** Data of full-length concatenated alignment data used on phylogenetic analysis. Introns of the genes Argk, Opsin and PEPCK belonging to outgroup taxa were removed of analyses. TL – Total length; N – Number of charsets; Numbers between parenthesis refer to indels and when followed by 'N' the nucleotide base is not known.

| Taxon                                 | TL (bp) | N  | 12S     | 16S     | COI  | CytB | Argk exon | Argk intron | EF1 $\alpha$ exon | EF1 $\alpha$ intron | Opsin exon | Opsin intron | PEPCK exon | PEPCK intron |
|---------------------------------------|---------|----|---------|---------|------|------|-----------|-------------|-------------------|---------------------|------------|--------------|------------|--------------|
| <i>Apis cerana</i>                    | 4225    | 8  | 389     | 412 (3) | 972  | 587  | 530       | 0           | 759               | 85                  | 491        | 0            | 0          | 0            |
| <i>Apis dorsata</i>                   | 4059    | 9  | 389 (1) | 384 (6) | 621  | 503  | 468       | 0           | 759               | 85                  | 502        | 0            | 348        | 0            |
| <i>Apis mellifera</i>                 | 4605    | 9  | 389     | 384 (4) | 1044 | 469  | 599       | 0           | 819               | 85                  | 462        | 0            | 354        | 0            |
| <i>B. affinis</i> SC167               | 3984    | 10 | 0       | 441     | 658  | 0    | 599       | 248         | 529               | 85                  | 502        | 101          | 381        | 440 (40)     |
| <i>B. keriensis</i> SC085             | 4674    | 11 | 0       | 441     | 943  | 465  | 539       | 248         | 529               | 85                  | 502        | 101          | 381        | 440          |
| <i>B. alboanalis</i> SC257            | 3326    | 9  | 0       | 441     | 0    | 0    | 599       | 248         | 529               | 85                  | 502        | 101          | 381        | 440          |
| <i>B. alpinus</i> SC029               | 3942    | 10 | 0       | 441     | 616  | 0    | 599       | 248         | 529               | 85                  | 502        | 101          | 381        | 440          |
| <i>B. amurensis</i> COI 5P2           | 602     | 1  | 0       | 0       | 602  | 0    | 0         | 0           | 0                 | 0                   | 0          | 0            | 0          | 0            |
| <i>B. anachoreta</i> AN00001          | 657     | 1  | 0       | 0       | 657  | 0    | 0         | 0           | 0                 | 0                   | 0          | 0            | 0          | 0            |
| <i>B. cullumanus apollineus</i> SC084 | 3286    | 9  | 0       | 441     | 0    | 0    | 599       | 248 (32)    | 529               | 85                  | 502        | 101          | 357        | 424          |
| [ <i>B. applanatus</i> EF209]         | 1987    | 5  | 0       | 0       | 631  | 0    | 488       | 248 (1)     | 535               | 85                  | 0          | 0            | 0          | 0            |
| <i>B. appositus</i> SC145             | 3887    | 10 | 0       | 441     | 561  | 0    | 599       | 248 (1)     | 529               | 85                  | 502        | 101          | 381        | 440 (11)     |
| <i>B. ardens</i> SC131                | 3947    | 10 | 0       | 441     | 658  | 0    | 530       | 248         | 529               | 85                  | 534        | 101          | 381        | 440          |
| <i>B. argillaceus</i> SC058           | 4536    | 11 | 0       | 441     | 657  | 553  | 599       | 248 (1)     | 529               | 85                  | 502        | 101          | 381        | 440          |
| <i>B. armeniacus</i> SC080            | 3326    | 9  | 0       | 441     | 0    | 0    | 599       | 248 (1)     | 529               | 85                  | 502        | 101          | 381        | 440          |
| <i>B. ashtoni</i> SC164               | 3928    | 10 | 0       | 441     | 639  | 0    | 530       | 248 (2)     | 529               | 85                  | 534        | 101          | 381        | 440 (37)     |
| <i>B. asiaticus</i> SC249             | 3168    | 9  | 0       | 441     | 0    | 0    | 539       | 248         | 529               | 85                  | 502        | 92           | 381        | 351          |
| <i>B. atripes</i> SC066               | 3312    | 9  | 0       | 441     | 0    | 0    | 588       | 248 (57)    | 529               | 85                  | 502        | 101          | 378        | 440          |
| <i>B. auricomus</i> SC062             | 3829    | 10 | 0       | 441     | 658  | 0    | 444       | 248 (49)    | 529               | 85                  | 502        | 101 (11)     | 381        | 440 (3)      |
| <i>B. avanus</i> SC272                | 3265    | 9  | 0       | 441     | 0    | 0    | 599       | 248         | 529               | 85                  | 502        | 101          | 357        | 403 (4)      |

| Taxon                                 | TL (bp) | N  | 12S          | 16S | COI         | CytB        | Argk exon | Argk intron | EF1 α exon | EF1 α intron | Opsin exon  | Opsin intron   | PEPCK exon | PEPCK intron |
|---------------------------------------|---------|----|--------------|-----|-------------|-------------|-----------|-------------|------------|--------------|-------------|----------------|------------|--------------|
| <i>B. avinoviellus</i> SC242          | 3809    | 10 | 0            | 441 | 0           | 572 (3 'N') | 539       | 248 (12)    | 529        | 85           | 473         | 101 (1 'N', 2) | 381        | 440          |
| <i>B. baeri</i> SC174                 | 3266    | 9  | 0            | 441 | 0           | 0           | 539       | 248 (17)    | 529        | 85           | 502         | 101            | 381        | 440          |
| <i>B. bahiensis</i> 52893             | 4162    | 11 | 0            | 441 | 656         | 414         | 539       | 248 (1)     | 513        | 85           | 473         | 101            | 348        | 344 (1)      |
| <i>B. balteatus</i> SC039             | 4935    | 11 | 0            | 441 | 1056        | 553         | 599       | 248         | 529        | 85           | 502         | 101            | 381        | 440          |
| <i>B. barbutellus</i> SC073           | 3897    | 10 | 0            | 441 | 571 (4 'N') | 0           | 599       | 248 (1)     | 529        | 85           | 502         | 101            | 381        | 440 (37)     |
| <i>B. beaticola</i> J5                | 2907    | 7  | 0            | 0   | 891         | 0           | 530       | 248         | 518        | 85           | 534         | 101            | 0          | 0            |
| <i>B. bellicosus</i> SC221            | 4056    | 11 | 389 (10 'N') | 441 | 430         | 0           | 539       | 248 (1)     | 529        | 85           | 473         | 101 (1 'N', 2) | 381        | 440          |
| <i>B. bicoloratus</i> SC225           | 3849    | 10 | 0            | 441 | 657         | 0           | 530       | 248 (1)     | 529        | 85           | 534         | 101            | 348        | 376          |
| <i>B. bifarius</i> SC208              | 4175    | 11 | 0            | 441 | 333         | 553 (2 'N') | 530       | 248 (78)    | 529        | 85           | 534         | 101            | 381        | 440          |
| <i>B. bimaculatus</i> SC218           | 3984    | 10 | 0            | 441 | 658         | 0           | 599       | 248 (78)    | 529        | 85           | 502         | 101            | 381        | 440          |
| <i>B. biroi</i> SC210                 | 3266    | 9  | 0            | 441 | 0           | 0           | 539       | 248         | 529        | 85           | 502         | 101            | 381        | 440          |
| <i>B. bohemicus</i> SC055             | 4319    | 11 | 0            | 441 | 571 (4 'N') | 459         | 530       | 248 (2)     | 529        | 85           | 534         | 101            | 381        | 440 (37)     |
| <i>B. borealis</i> SC250              | 3863    | 10 | 0            | 441 | 622         | 0           | 530       | 248 (1)     | 529        | 85           | 534         | 101            | 351        | 422 (11)     |
| <i>B. brachycephalus</i> SC230        | 3326    | 9  | 0            | 441 | 0           | 0           | 599       | 248 (17)    | 529        | 85           | 502         | 101            | 381        | 440          |
| <i>B. brasiliensis</i> 1218400        | 4177    | 11 | 0            | 441 | 658         | 414         | 539       | 248 (1)     | 529        | 85           | 473         | 101            | 348        | 341 (1)      |
| <i>B. brasiliensis</i> SC219          | 3635    | 10 | 389          | 441 | 471         | 414         | 0         | 0           | 529        | 85           | 473 (3 'N') | 101 (7 'N', 2) | 381        | 351          |
| <i>B. breviceps</i> SC190             | 4286    | 10 | 0            | 441 | 960         | 0           | 599       | 248         | 529        | 85           | 502         | 101            | 381        | 440          |
| <i>B. brevivillus</i> 1200916         | 3862    | 11 | 0            | 441 | 471         | 414         | 414       | 248 (1)     | 521        | 85           | 473         | 101            | 348        | 346 (1)      |
| <i>B. brevivillus</i> 1202754         | 3952    | 11 | 0            | 441 | 471         | 414         | 508       | 248 (1)     | 521 (1)    | 85           | 473         | 101            | 348        | 342 (1)      |
| <i>B. brevivillus</i> 1207210         | 3916    | 11 | 0            | 441 | 608         | 362         | 414       | 248 (1)     | 497        | 85           | 473         | 101            | 348        | 339 (1)      |
| <i>B. brevivillus</i> 1207320         | 3764    | 11 | 0            | 441 | 601         | 305         | 414       | 248 (1)     | 529        | 85           | 473         | 101            | 348        | 219          |
| <i>B. brevivillus</i> 1207321         | 3941    | 11 | 0            | 441 | 601         | 362         | 414       | 248 (1)     | 529        | 85           | 473         | 101            | 348        | 339 (1)      |
| <i>B. brodmannicus</i> SC077          | 4174    | 10 | 0            | 441 | 848         | 0           | 599       | 248         | 529        | 85           | 502         | 101            | 381        | 440          |
| <i>B. fervidus californicus</i> SC306 | 3686    | 10 | 389 (1)      | 441 | 0           | 0           | 599       | 248 (1)     | 529        | 85           | 473         | 101 (2)        | 381        | 440          |
| <i>B. caliginosus</i> SC150           | 3289    | 9  | 0            | 441 | 0           | 0           | 530       | 248         | 529        | 85           | 534         | 101            | 381        | 440          |
| <i>B. campestris</i> SC040            | 3914    | 10 | 0            | 441 | 634         | 0           | 530       | 248 (2)     | 520        | 85           | 534         | 101            | 381        | 440 (37)     |

| Taxon                                 | TL (bp) | N  | 12S     | 16S     | COI         | CytB | Argk exon | Argk intron | EF1 α exon | EF1 α intron | Opsin exon | Opsin intron   | PEPCK exon | PEPCK intron |
|---------------------------------------|---------|----|---------|---------|-------------|------|-----------|-------------|------------|--------------|------------|----------------|------------|--------------|
| <i>B. centralis</i> SC146             | 3869    | 10 | 0       | 441     | 543 (1 'N') | 0    | 599       | 248         | 529        | 85           | 502        | 101            | 381        | 440          |
| <i>B. chinensis</i> SC152             | 3326    | 9  | 0       | 441     | 0           | 0    | 599       | 248 (1)     | 529        | 85           | 502        | 101            | 381        | 440 (37)     |
| <i>B. cingulatus</i> SC212            | 4091    | 10 | 0       | 441     | 891         | 0    | 530       | 248         | 529        | 85           | 534        | 101            | 381        | 351          |
| <i>B. citrinus</i> SC170              | 3896    | 10 | 0       | 441     | 639         | 0    | 530       | 248 (53)    | 529        | 85           | 502        | 101            | 381        | 440 (37)     |
| <i>B. coccineus</i> SC137             | 3326    | 9  | 0       | 441     | 0           | 0    | 599       | 248 (17)    | 529        | 85           | 502        | 101            | 381        | 440          |
| <i>B. confusus</i> SC083              | 3984    | 10 | 0       | 441     | 658         | 0    | 599       | 248 (173)   | 529        | 85           | 502        | 101            | 381        | 440          |
| <i>B. consobrinus</i> SC261           | 4534    | 11 | 0       | 441     | 658         | 587  | 530       | 248 (1)     | 529        | 85           | 534        | 101            | 381        | 440          |
| <i>B. convexus</i> SC109              | 3190    | 9  | 0       | 441     | 0           | 0    | 539       | 248 (12)    | 529        | 85           | 502        | 101            | 348        | 397          |
| <i>B. coreanus</i> J4                 | 412     | 1  | 0       | 412     | 0           | 0    | 0         | 0           | 0          | 0            | 0          | 0              | 0          | 0            |
| <i>B. cornutus</i> SC271              | 2930    | 9  | 0       | 441     | 0           | 0    | 539       | 248 (1)     | 529        | 85           | 234        | 33             | 381        | 440 (37)     |
| <i>B. crotchii</i> SC071              | 3289    | 9  | 0       | 441     | 0           | 0    | 530       | 248 (17)    | 529        | 85           | 534        | 101            | 381        | 440          |
| <i>B. cryptarum</i> SC127             | 3984    | 10 | 0       | 441     | 658         | 0    | 599       | 248         | 529        | 85           | 502        | 101            | 381        | 440 (40)     |
| <i>B. cullumanus</i> COI 5P4          | 568     | 1  | 0       | 0       | 568         | 0    | 0         | 0           | 0          | 0            | 0          | 0              | 0          | 0            |
| <i>B. czerskii</i> CZ00024            | 1245    | 2  | 0       | 0       | 658         | 587  | 0         | 0           | 0          | 0            | 0          | 0              | 0          | 0            |
| <i>B. dahlbomii</i> SC016             | 4564    | 12 | 389 (1) | 441     | 333         | 553  | 530       | 248 (1)     | 529        | 85           | 534        | 101            | 381        | 440          |
| <i>B. defector</i> J3                 | 4173    | 10 | 0       | 441     | 891         | 0    | 530       | 248 (12)    | 529        | 85           | 534        | 101            | 381        | 433          |
| <i>B. deuteronymus</i> SC147          | 4067    | 10 | 0       | 441     | 891         | 0    | 530       | 248 (3)     | 529        | 83           | 502        | 101            | 381        | 361 (4)      |
| <i>B. difficillimus</i> SC154         | 3326    | 9  | 0       | 441     | 0           | 0    | 599       | 248 (1)     | 529        | 85           | 502        | 101            | 381        | 440          |
| <i>B. digressus</i> SC307             | 3537    | 10 | 389 (1) | 441     | 0           | 0    | 539       | 248 (26)    | 529        | 85           | 473        | 101 (4 'N', 2) | 381        | 351 (1)      |
| <i>B. diligens</i> SC171              | 4317    | 11 | 389     | 441     | 631         | 0    | 599       | 248 (24)    | 529        | 85           | 473        | 101 (1 'N', 2) | 381        | 440          |
| <i>B. distinguendus</i> SC197         | 3927    | 10 | 0       | 441     | 601         | 0    | 599       | 248 (11)    | 529        | 85           | 502        | 101            | 381        | 440 (11)     |
| <i>B. diversus</i> SC120              | 4177    | 10 | 0       | 441 (2) | 658         | 0    | 530       | 248 (1)     | 759        | 85           | 534        | 101            | 381        | 440          |
| <i>B. ecuadorius</i> SC135            | 3326    | 9  | 0       | 441     | 0           | 0    | 599       | 248 (17)    | 529        | 85           | 502        | 101            | 381        | 440 (5)      |
| <i>B. ephippiatus</i> SC198           | 4137    | 10 | 0       | 441 (1) | 811         | 0    | 599       | 248 (78)    | 529        | 85           | 502        | 101            | 381        | 440          |
| <i>B. sichelii erzurumensis</i> SC126 | 4269    | 10 | 0       | 441     | 943         | 0    | 599       | 248         | 529        | 85           | 502        | 101            | 381        | 440          |
| <i>B. excellens</i> SC308             | 4257    | 11 | 389 (1) | 441     | 631         | 0    | 539       | 248 (1)     | 529        | 85           | 473        | 101 (2)        | 381        | 440          |

| Taxon                              | TL (bp) | N  | 12S     | 16S     | COI           | CytB        | Argk exon   | Argk intron    | EF1 α exon | EF1 α intron | Opsin exon | Opsin intron | PEPCK exon | PEPCK intron |
|------------------------------------|---------|----|---------|---------|---------------|-------------|-------------|----------------|------------|--------------|------------|--------------|------------|--------------|
| <i>B. exil</i> SC232               | 3246    | 9  | 0       | 441     | 0             | 0           | 539         | 248 (49)       | 529        | 85           | 502        | 101          | 361        | 440          |
| <i>B. eximius</i> SC049            | 4035    | 10 | 0       | 441     | 709           | 0           | 599         | 248            | 529        | 85           | 502        | 101          | 381        | 440          |
| <i>B. flavidus fernaldae</i> SC088 | 3937    | 10 | 0       | 441     | 648           | 0           | 530         | 248 (2)        | 529        | 85           | 534        | 101          | 381        | 440 (37)     |
| <i>B. fervidus</i> SC309           | 4316    | 11 | 388 (1) | 441     | 639           | 0           | 530         | 248 (1 'N', 1) | 529        | 85           | 534        | 101          | 381        | 440          |
| <i>B. festivus</i> SC104           | 3326    | 9  | 0       | 441 (1) | 0             | 0           | 599         | 248            | 529        | 85           | 502        | 101          | 381        | 440          |
| <i>B. filchnerae</i> SC206         | 4390    | 11 | 0       | 441     | 477           | 587         | 599         | 248 (1)        | 529        | 85           | 502        | 101          | 381        | 440 (4)      |
| <i>B. flavescens</i> SC181         | 3998    | 10 | 0       | 441     | 709           | 0           | 530         | 248            | 529        | 85           | 534        | 101          | 381        | 440          |
| <i>B. flavidus</i> SC041           | 4382    | 10 | 0       | 441     | 1056          | 0           | 599         | 248 (2)        | 529        | 85           | 502        | 101          | 381        | 440 (37)     |
| <i>B. flavifrons</i> SC095         | 4500    | 11 | 0       | 441     | 658           | 553         | 530         | 248            | 529        | 85           | 534        | 101          | 381        | 440          |
| <i>B. formosellus</i> J2           | 2918    | 7  | 0       | 0       | 891           | 0           | 530         | 248            | 529        | 85           | 534        | 101          | 0          | 0            |
| <i>B. fragrans</i> SC061           | 3913    | 10 | 0       | 441     | 0             | 587 (1)     | 599         | 248 (1)        | 529        | 85           | 502        | 101          | 381        | 440          |
| <i>B. franklini</i> SC256          | 4193    | 10 | 0       | 417     | 891           | 0           | 599         | 248            | 529        | 85           | 502        | 101          | 381        | 440 (40)     |
| <i>B. fraternus</i> SC183          | 3947    | 10 | 0       | 441 (1) | 658           | 0           | 530         | 248 (17)       | 529        | 85           | 534        | 101          | 381        | 440          |
| <i>B. frigidus</i> SC185           | 4535    | 11 | 0       | 441     | 658           | 553         | 597 (2 'N') | 248            | 529        | 85           | 502        | 101          | 381        | 440          |
| <i>B. friseanus</i> SC105          | 3326    | 9  | 0       | 441     | 0             | 0           | 599         | 248            | 529        | 85           | 502        | 101          | 381        | 440          |
| <i>B. funebris</i> SC128           | 4500    | 11 | 0       | 431     | 631 (30 'N')  | 553 (1 'N') | 599         | 248 (17)       | 529        | 85           | 502        | 101          | 381        | 440 (1)      |
| <i>B. funerarius</i> SC270         | 4291    | 10 | 0       | 441     | 965           | 0           | 599         | 248 (1)        | 529        | 85           | 502        | 101          | 381        | 440 (13)     |
| <i>B. gerstaeckeri</i> SC065       | 3981    | 10 | 0       | 441     | 655           | 0           | 599         | 248 (1)        | 529        | 85           | 502        | 101          | 381        | 440          |
| <i>B. grahami</i> SC273            | 4088    | 10 | 0       | 441     | 960 (152 'N') | 0           | 519         | 248            | 529        | 85           | 502        | 101          | 348        | 355 (4 'N')  |
| <i>B. griseocollis</i> SC082       | 3289    | 9  | 0       | 441     | 0             | 0           | 530         | 248 (17)       | 529        | 85           | 534        | 101          | 381        | 440          |
| <i>B. haematurus</i> SC211         | 1373    | 5  | 0       | 441     | 0             | 0           | 0           | 0              | 529        | 85           | 0          | 0            | 201        | 117          |
| <i>B. haemorrhoidalis</i> SC191    | 3908    | 10 | 0       | 441     | 658           | 0           | 491         | 248 (1 'N', 1) | 529        | 85           | 534        | 101          | 381        | 440          |
| <i>B. handlirschi</i> SC132        | 3212    | 9  | 0       | 441     | 0             | 0           | 539         | 248 (17)       | 529        | 85           | 502        | 101          | 351        | 416 (4)      |
| <i>B. handlirschianus</i> SC087    | 3266    | 9  | 0       | 441     | 0             | 0           | 539         | 248 (16)       | 529        | 85           | 502        | 101          | 381        | 440          |
| <i>B. hedinii</i> SC129            | 3913    | 10 | 0       | 441     | 0             | 587         | 599         | 248 (6)        | 529        | 85           | 502        | 101          | 381        | 440 (4)      |
| <i>B. honshuensis</i> J7           | 2918    | 7  | 0       | 0       | 891           | 0           | 530         | 248 (6)        | 529        | 85           | 534        | 101          | 0          | 0            |

| Taxon                                   | TL (bp) | N  | 12S | 16S | COI         | CytB | Argk exon | Argk intron | EF1 α exon | EF1 α intron | Opsin exon | Opsin intron | PEPCK exon | PEPCK intron |
|-----------------------------------------|---------|----|-----|-----|-------------|------|-----------|-------------|------------|--------------|------------|--------------|------------|--------------|
| <i>B. h hortorum</i> HorH01             | 2788    | 6  | 0   | 0   | 849         | 459  | 0         | 0           | 574        | 85           | 0          | 0            | 381        | 440          |
| <i>B. h jonghei</i> HorJ01              | 2788    | 6  | 0   | 0   | 849         | 459  | 0         | 0           | 574        | 85           | 0          | 0            | 381        | 440          |
| <i>B. hortorum</i> SC005                | 4405    | 11 | 0   | 441 | 657         | 459  | 530       | 248 (1)     | 529        | 85           | 534        | 101          | 381        | 440          |
| <i>B. hortulanus</i> SC200              | 3326    | 9  | 0   | 441 | 0           | 0    | 599       | 248 (17)    | 529        | 85           | 502        | 101          | 381        | 440 (5)      |
| <i>B. humilis</i> SC056                 | 4303    | 11 | 0   | 441 | 658         | 400  | 599       | 248 (3)     | 529        | 83           | 502        | 101          | 381        | 361 (4)      |
| <i>B. huntii</i> SC151                  | 4100    | 10 | 0   | 441 | 811         | 0    | 530       | 248 (78)    | 529        | 85           | 534        | 101          | 381        | 440          |
| <i>B. hyperboreus</i> SC070             | 4935    | 11 | 0   | 441 | 1056        | 553  | 599       | 248 (6)     | 529        | 85           | 502        | 101          | 381        | 440          |
| <i>B. hypnorum</i> SC078                | 4872    | 11 | 0   | 441 | 1056        | 553  | 530       | 248         | 529        | 85           | 534        | 101          | 355        | 440          |
| <i>B. hypnorum</i> SC207                | 4795    | 11 | 0   | 432 | 891         | 587  | 599       | 248         | 529        | 85           | 502        | 101          | 381        | 440          |
| <i>B. hypocrita</i> SC123               | 4387    | 11 | 0   | 441 | 639         | 459  | 530       | 248         | 529        | 85           | 534        | 101          | 381        | 440 (40)     |
| <i>B. ignitus</i> SC096                 | 4534    | 11 | 0   | 441 | 658         | 587  | 530       | 248         | 529        | 85           | 534        | 101          | 381        | 440 (49)     |
| <i>B. imitator</i> SC028                | 3326    | 9  | 0   | 441 | 0           | 0    | 599       | 248 (1)     | 529        | 85           | 502        | 101          | 381        | 440 (30)     |
| <i>B. impatiens</i> SC060               | 3925    | 10 | 0   | 441 | 658         | 0    | 530       | 248 (78)    | 529        | 85           | 534        | 101          | 359        | 440          |
| <i>B. impetuosus</i> SC284              | 3305    | 9  | 0   | 441 | 0           | 0    | 578       | 248 (6)     | 529        | 85           | 502        | 101          | 381        | 440 (46)     |
| <i>B. incertus</i> SC086                | 4675    | 11 | 0   | 441 | 944         | 465  | 539       | 248         | 529        | 85           | 502        | 101          | 381        | 440          |
| <i>B. inexpectatus</i> B05              | 3042    | 9  | 0   | 411 | 0           | 0    | 509       | 248 (1)     | 529        | 85           | 459        | 101          | 348        | 352 (46)     |
| <i>B. infirmus</i> SC157                | 3316    | 9  | 0   | 441 | 0           | 0    | 599       | 248 (26)    | 529        | 85           | 502        | 101          | 381        | 430          |
| <i>B. infrequens</i> SC140              | 3326    | 9  | 0   | 441 | 0           | 0    | 599       | 248         | 529        | 85           | 502        | 101          | 381        | 440          |
| <i>B. insularis</i> SC162               | 3897    | 10 | 0   | 441 | 608 (1 'N') | 0    | 530       | 248 (53)    | 529        | 85           | 534        | 101          | 381        | 440 (37)     |
| <i>B. jacobsoni</i> COI 5P5             | 425     | 1  | 0   | 0   | 425 (1 'N') | 0    | 0         | 0           | 0          | 0            | 0          | 0            | 0          | 0            |
| <i>B. jonellus</i> SC079                | 4537    | 11 | 0   | 441 | 658         | 553  | 599       | 248         | 529        | 85           | 502        | 101          | 381        | 440          |
| <i>B. kashmirensis</i> SC121            | 3325    | 9  | 0   | 441 | 0           | 0    | 598       | 248         | 529        | 85           | 502        | 101          | 381        | 440          |
| <i>B. keriensis</i> s. l. SC114         | 3326    | 9  | 0   | 441 | 0           | 0    | 599       | 248         | 529        | 85           | 502        | 101          | 381        | 440          |
| <i>B. kirbiellus</i> 3534               | 821     | 2  | 0   | 0   | 0           | 0    | 0         | 0           | 0          | 0            | 0          | 0            | 381        | 440          |
| <i>B. koreanus</i> SC277                | 3947    | 10 | 0   | 441 | 658         | 0    | 530       | 248 (1)     | 529        | 85           | 534        | 101          | 381        | 440          |
| <i>B. bicoloratus</i> kulingensis SC097 | 4238    | 10 | 0   | 441 | 980         | 0    | 539       | 248 (1)     | 521        | 85           | 502        | 101          | 381        | 440          |

| Taxon                                  | TL (bp) | N  | 12S | 16S     | COI          | CytB | Argk exon | Argk intron | EF1 $\alpha$ exon | EF1 $\alpha$ intron | Opsin exon | Opsin intron   | PEPCK exon | PEPCK intron |
|----------------------------------------|---------|----|-----|---------|--------------|------|-----------|-------------|-------------------|---------------------|------------|----------------|------------|--------------|
| <i>B. ladakhensis</i> SC158            | 3320    | 9  | 0   | 441     | 0            | 0    | 599       | 248         | 523               | 85                  | 502        | 101            | 381        | 440          |
| <i>B. laesus</i> SC052                 | 3970    | 10 | 0   | 441     | 657          | 0    | 599       | 248 (1)     | 529               | 85                  | 502        | 101            | 369        | 439 (77)     |
| <i>B. lantschouensis</i> 6873A01       | 658     | 1  | 0   | 0       | 658          | 0    | 0         | 0           | 0                 | 0                   | 0          | 0              | 0          | 0            |
| <i>B. caucasicus</i> L084TR            | 3651    | 8  | 0   | 0       | 1056         | 465  | 0         | 0           | 589               | 85                  | 534        | 101            | 381        | 440          |
| <i>B. lapidarius</i> SC006             | 4804    | 11 | 0   | 441     | 1050         | 465  | 530       | 248         | 529               | 85                  | 534        | 101            | 381        | 440          |
| <i>B. lapponicus</i> SC103             | 4536    | 11 | 0   | 441     | 658          | 553  | 599       | 248 (78)    | 528               | 85                  | 502        | 101            | 381        | 440          |
| <i>B. lemniscatus</i> SC161            | 3289    | 9  | 0   | 441     | 0            | 0    | 599       | 248 (22)    | 529               | 85                  | 502        | 101            | 358        | 426          |
| <i>B. lepidus</i> SC155                | 3326    | 9  | 0   | 441     | 0            | 0    | 599       | 248 (22)    | 529               | 85                  | 502        | 101            | 381        | 440          |
| <i>B. longipennis</i> 1551             | 658     | 1  | 0   | 0       | 658          | 0    | 0         | 0           | 0                 | 0                   | 0          | 0              | 0          | 0            |
| <i>B. longipes</i> SC194               | 3983    | 10 | 0   | 441 (2) | 657          | 0    | 599       | 248 (1)     | 529               | 85                  | 502        | 101            | 381        | 440 (6)      |
| <i>B. l. lucorum</i> LucL24            | 2788    | 6  | 0   | 0       | 849          | 459  | 0         | 0           | 574               | 85                  | 0          | 0              | 381        | 440 (40)     |
| <i>B. l. renardi</i> LucR18            | 2788    | 6  | 0   | 0       | 849          | 459  | 0         | 0           | 574               | 85                  | 0          | 0              | 381        | 440 (40)     |
| <i>B. lucorum</i> SC184                | 4804    | 11 | 0   | 441     | 891          | 587  | 599       | 248         | 529               | 85                  | 502        | 101            | 381        | 440 (40)     |
| <i>B. lucorum</i> SC217                | 4357    | 11 | 0   | 441     | 609          | 459  | 530       | 248         | 529               | 85                  | 534        | 101            | 381        | 440 (40)     |
| <i>B. luteipes</i> SC195               | 441     | 1  | 0   | 441     | 0            | 0    | 0         | 0           | 0                 | 0                   | 0          | 0              | 0          | 0            |
| <i>B. macgregori</i> SC231             | 3326    | 9  | 0   | 441     | 0            | 0    | 599       | 248 (17)    | 529               | 85                  | 502        | 101            | 381        | 440          |
| <i>B. magnus</i> B08                   | 1056    | 1  | 0   | 0       | 1056         | 0    | 0         | 0           | 0                 | 0                   | 0          | 0              | 0          | 0            |
| <i>B. margreiteri</i> B01              | 1262    | 3  | 0   | 441     | 0            | 0    | 0         | 0           | 0                 | 0                   | 0          | 0              | 381        | 440          |
| <i>B. barbutellus maxillosus</i> SC074 | 3326    | 9  | 0   | 441     | 0            | 0    | 599       | 248 (1)     | 529               | 85                  | 502        | 101            | 381        | 440 (37)     |
| <i>B. medius</i> SC222                 | 3868    | 10 | 0   | 441     | 631 (24 'N') | 0    | 539       | 248 (6)     | 529               | 85                  | 473        | 101 (3 'N', 2) | 381        | 440          |
| <i>B. melaleucus</i> SC173             | 3266    | 9  | 0   | 441     | 0            | 0    | 539       | 248 (18)    | 529               | 85                  | 502        | 101            | 381        | 440 (5)      |
| <i>B. melanopygus</i> SC215            | 3947    | 10 | 0   | 441     | 658          | 0    | 530       | 248 (78)    | 529               | 85                  | 534        | 101            | 381        | 440          |
| <i>B. melanurus</i> SC022              | 4445    | 11 | 0   | 441     | 658          | 587  | 530       | 248 (1)     | 529               | 85                  | 534        | 101            | 381        | 351          |
| <i>B. mendax</i> SC019                 | 3941    | 10 | 0   | 441     | 658          | 0    | 530       | 248 (12)    | 523               | 85                  | 534        | 101            | 381        | 440          |
| <i>B. mesomelas</i> SC037              | 4537    | 11 | 0   | 441     | 658          | 553  | 599       | 248 (1)     | 529               | 85                  | 502        | 101            | 381        | 440          |
| <i>B. mexicanus</i> SC220              | 3560    | 10 | 0   | 441     | 335          | 0    | 527       | 248 (6)     | 529               | 85                  | 473        | 101 (3 'N', 2) | 381        | 440          |

| Taxon                               | TL (bp) | N  | 12S     | 16S     | COI         | CytB        | Argk exon | Argk intron | EF1 $\alpha$ exon | EF1 $\alpha$ intron | Opsin exon  | Opsin intron | PEPCK exon | PEPCK intron |
|-------------------------------------|---------|----|---------|---------|-------------|-------------|-----------|-------------|-------------------|---------------------|-------------|--------------|------------|--------------|
| <i>B. miniatus</i> s. l. SC244      | 3266    | 9  | 0       | 441     | 0           | 0           | 539       | 248         | 529               | 85                  | 502         | 101          | 381        | 440          |
| <i>B. minshanensis</i> 6873B05      | 658     | 1  | 0       | 0       | 658         | 0           | 0         | 0           | 0                 | 0                   | 0           | 0            | 0          | 0            |
| <i>B. mixtus</i> SC024              | 3912    | 10 | 0       | 441     | 623 (1 'N') | 0           | 530       | 248         | 529               | 85                  | 534         | 101          | 381        | 440          |
| <i>B. mlokosievitzii</i> SC081      | 3326    | 9  | 0       | 441     | 0           | 0           | 599       | 248 (1)     | 529               | 85                  | 502         | 101          | 381        | 440 (46)     |
| <i>B. cryptarum moderatus</i> SC163 | 3984    | 10 | 0       | 441     | 658 (1 'N') | 0           | 599       | 248         | 529               | 85                  | 502         | 101          | 381        | 440 (40)     |
| <i>B. wangae</i> SC160              | 4217    | 10 | 0       | 441     | 891         | 0           | 599       | 248         | 529               | 85                  | 502         | 101          | 381        | 440          |
| <i>B. modestus</i> SC238            | 4804    | 11 | 0       | 441 (1) | 891         | 587         | 599       | 248         | 529               | 85                  | 502         | 101          | 381        | 440          |
| <i>B. mongolensis</i> COI 5P        | 600     | 1  | 0       | 0       | 600         | 0           | 0         | 0           | 0                 | 0                   | 0           | 0            | 0          | 0            |
| <i>B. monticola</i> SC176           | 3984    | 10 | 0       | 441     | 658         | 0           | 599       | 248 (78)    | 529               | 85                  | 502         | 101          | 381        | 440          |
| <i>B. morio</i> B13                 | 3998    | 11 | 0       | 441     | 471         | 414         | 537       | 248 (1)     | 529               | 85                  | 473         | 101          | 348        | 351 (1)      |
| <i>B. morio</i> SC310               | 4571    | 12 | 389 (3) | 441     | 471         | 414         | 599       | 248 (1)     | 529               | 85                  | 473 (1 'N') | 101 (2)      | 381        | 440          |
| <i>B. morrisoni</i> SC196           | 3326    | 9  | 0       | 441     | 0           | 0           | 599       | 248 (17)    | 529               | 85                  | 502         | 101          | 381        | 440          |
| <i>B. mucidus</i> SC059             | 3852    | 10 | 0       | 441     | 573         | 0           | 530       | 248 (1)     | 519               | 85                  | 534         | 101          | 381        | 440 (4)      |
| <i>B. m perezii</i> Perl01          | 1508    | 3  | 0       | 0       | 849         | 0           | 0         | 0           | 574               | 85                  | 0           | 0            | 0          | 0            |
| <i>B. muscorum</i> SC033            | 4771    | 11 | 389 (2) | 441     | 1056        | 0           | 599       | 248 (1)     | 529               | 85                  | 502         | 101          | 381        | 440 (4)      |
| <i>B. natvigii</i> B06              | 840     | 2  | 0       | 0       | 0           | 0           | 0         | 0           | 0                 | 0                   | 0           | 0            | 400        | 440          |
| <i>B. neoboreus</i> SC188           | 3326    | 9  | 0       | 441     | 0           | 0           | 599       | 248 (6)     | 529               | 85                  | 502         | 101          | 381        | 440          |
| <i>B. nevadensis</i> SC139          | 4007    | 11 | 0       | 441     | 333         | 553         | 428       | 248         | 529               | 85                  | 502         | 101 (11)     | 357        | 430 (6)      |
| <i>B. niveatus</i> SC093            | 3225    | 9  | 0       | 441     | 0           | 0           | 599       | 248         | 529               | 84                  | 502         | 90           | 381        | 351          |
| <i>B. nobilis</i> SC098             | 3326    | 9  | 0       | 441     | 0           | 0           | 599       | 248         | 529               | 85                  | 502         | 101          | 381        | 440          |
| <i>B. norvegicus</i> SC089          | 4510    | 11 | 0       | 441     | 631         | 553 (1 'N') | 599       | 248 (2)     | 529               | 85                  | 502         | 101          | 381        | 440 (37)     |
| <i>B. semenovi</i> SC234            | 3317    | 9  | 0       | 441     | 0           | 0           | 599       | 248         | 529               | 85                  | 502         | 92           | 381        | 440 (2)      |
| <i>B. occidentalis</i> SC026        | 3918    | 10 | 0       | 441     | 592 (1 'N') | 0           | 599       | 248         | 529               | 85                  | 502         | 101          | 381        | 440 (40)     |
| <i>B. opifex</i> SC175              | 3957    | 10 | 0       | 441     | 631         | 0           | 599       | 248 (1)     | 529               | 85                  | 502         | 101          | 381        | 440          |
| <i>B. parthenius</i> SC241          | 3266    | 9  | 0       | 441     | 0           | 0           | 539       | 248         | 529               | 85                  | 502         | 101          | 381        | 440          |
| <i>B. pascuorum</i> SC023           | 4797    | 12 | 389 (1) | 441     | 658         | 461         | 530       | 248 (5)     | 529               | 85                  | 534         | 101          | 381        | 440 (4)      |

| Taxon                               | TL (bp) | N  | 12S     | 16S | COI  | CytB | Argk exon   | Argk intron | EF1 $\alpha$ exon | EF1 $\alpha$ intron | Opsin exon  | Opsin intron   | PEPCK exon | PEPCK intron |
|-------------------------------------|---------|----|---------|-----|------|------|-------------|-------------|-------------------|---------------------|-------------|----------------|------------|--------------|
| <i>B. minshanensis</i> SC111        | 4534    | 11 | 0       | 441 | 658  | 587  | 530         | 248         | 529               | 85                  | 534         | 101            | 381        | 440 (40)     |
| <i>B. pauloensis</i> 77202          | 3302    | 9  | 0       | 441 | 568  | 415  | 0           | 0           | 529               | 85                  | 473         | 101            | 348        | 342 (1)      |
| <i>B. pauloensis</i> SC305          | 4509    | 12 | 389 (1) | 441 | 471  | 414  | 539         | 248 (6)     | 527               | 85                  | 473         | 101 (1 'N', 2) | 381        | 440          |
| <i>B. pennsylvanicus</i> SC311      | 3323    | 9  | 0       | 441 | 0    | 0    | 599         | 248 (1)     | 529               | 85                  | 502         | 101            | 381        | 437          |
| <i>B. pennsylvanicus</i> SC317      | 4917    | 12 | 388     | 441 | 631  | 572  | 599         | 248 (1)     | 529               | 85                  | 502         | 101            | 381        | 440          |
| <i>B. perplexus</i> SC166           | 3928    | 10 | 0       | 441 | 639  | 0    | 530         | 248         | 529               | 85                  | 534         | 101            | 381        | 440          |
| <i>B. persicus</i> SC054            | 3274    | 9  | 0       | 441 | 0    | 0    | 573         | 248 (15)    | 527               | 85                  | 502         | 101            | 359        | 438          |
| <i>B. personatus</i> SC138          | 3326    | 9  | 0       | 441 | 0    | 0    | 599         | 248 (1)     | 529               | 85                  | 502         | 101            | 381        | 440          |
| <i>B. picipes</i> SC180             | 3913    | 10 | 0       | 441 | 0    | 587  | 599         | 248         | 529               | 85                  | 502         | 101            | 381        | 440          |
| <i>B. pyrrhopygus</i> SC223         | 4256    | 10 | 0       | 441 | 1056 | 0    | 530         | 248         | 529               | 85                  | 534         | 101            | 381        | 351          |
| <i>B. pomorum</i> SC053             | 3326    | 9  | 0       | 441 | 0    | 0    | 599         | 248 (1)     | 529               | 85                  | 502         | 101            | 381        | 440          |
| <i>B. portchinsky</i> SC072         | 3946    | 10 | 0       | 441 | 658  | 0    | 599         | 248 (1)     | 529               | 85                  | 502         | 101            | 353        | 430 (12 'N') |
| <i>B. impetuosus potanini</i> SC113 | 3318    | 9  | 0       | 441 | 0    | 0    | 599         | 248 (6)     | 521               | 85                  | 502         | 101            | 381        | 440 (46)     |
| <i>B. pratorum</i> SC075            | 3897    | 10 | 0       | 441 | 658  | 0    | 530         | 248         | 529               | 85                  | 534         | 101            | 351        | 420          |
| <i>B. pressus</i> SC239             | 1365    | 5  | 0       | 441 | 0    | 0    | 0           | 0           | 529               | 85                  | 0           | 0              | 201        | 109          |
| <i>B. pseudobaicalensis</i> SC253   | 4767    | 11 | 0       | 441 | 891  | 587  | 530 (2 'N') | 248 (6)     | 529               | 85                  | 534         | 101            | 381        | 440 (4)      |
| <i>B. pullatus</i> SC312            | 4572    | 12 | 389     | 441 | 333  | 553  | 599         | 248 (1)     | 529               | 85                  | 473 (1 'N') | 101 (3 'N', 2) | 381        | 440          |
| <i>B. pyrenaeus</i> SC035           | 3984    | 10 | 0       | 441 | 658  | 0    | 599         | 248         | 529               | 85                  | 502         | 101            | 381        | 440          |
| <i>B. pyrosoma</i> B04              | 1764    | 3  | 0       | 394 | 783  | 587  | 0           | 0           | 0                 | 0                   | 0           | 0              | 0          | 0            |
| <i>B. pyrrhopygus</i> 3832          | 821     | 2  | 0       | 0   | 0    | 0    | 0           | 0           | 0                 | 0                   | 0           | 0              | 381        | 440          |
| <i>B. quadricolor</i> SC090         | 3984    | 10 | 0       | 441 | 658  | 0    | 599         | 248 (2)     | 529               | 85                  | 502         | 101            | 381        | 440 (37)     |
| <i>B. religiosus</i> SC141          | 3777    | 10 | 0       | 441 | 657  | 0    | 599         | 248 (1)     | 529               | 85                  | 296         | 101            | 381        | 440          |
| <i>B. remotus</i> SC192             | 3326    | 9  | 0       | 441 | 0    | 0    | 599         | 248 (6)     | 529               | 85                  | 502         | 101            | 381        | 440 (46)     |
| <i>B. robustus</i> SC050            | 4152    | 11 | 0       | 441 | 333  | 553  | 539         | 248 (17)    | 529               | 85                  | 502         | 101            | 381        | 440 (5)      |
| <i>B. rubicundus</i> SC202          | 3326    | 9  | 0       | 441 | 0    | 0    | 599         | 248 (17)    | 529               | 85                  | 502         | 101 (2)        | 381        | 440          |
| <i>B. ruderarius</i> SC047          | 4443    | 11 | 0       | 441 | 658  | 506  | 530         | 248 (1)     | 519               | 85                  | 534         | 101            | 381        | 440 (46)     |



| Taxon                                          | TL (bp) | N  | 12S         | 16S     | COI         | CytB        | Argk exon | Argk intron    | EF1 $\alpha$ exon | EF1 $\alpha$ intron | Opsin exon | Opsin intron   | PEPCK exon | PEPCK intron |
|------------------------------------------------|---------|----|-------------|---------|-------------|-------------|-----------|----------------|-------------------|---------------------|------------|----------------|------------|--------------|
| <i>B. r autumnnalis</i> RudA05                 | 2788    | 6  | 0           | 0       | 849         | 459         | 0         | 0              | 574               | 85                  | 0          | 0              | 381        | 440          |
| <i>B. r corsicola</i> RudC19                   | 2788    | 6  | 0           | 0       | 849         | 459         | 0         | 0              | 574               | 85                  | 0          | 0              | 381        | 440          |
| <i>B. r ruderatus</i> RudR20                   | 2788    | 6  | 0           | 0       | 849         | 459         | 0         | 0              | 574               | 85                  | 0          | 0              | 381        | 440          |
| <i>B. ruderatus</i> SC018                      | 4405    | 11 | 0           | 441     | 657         | 459         | 530       | 248 (1)        | 529               | 85                  | 534        | 101            | 381        | 440          |
| <i>B. rufocinctus</i> SC186                    | 3916    | 10 | 0           | 441     | 627         | 0           | 530       | 248 (8)        | 529               | 85                  | 534        | 101 (1)        | 381        | 440          |
| <i>B. rufofasciatus s. l.</i> SC133            | 3297    | 9  | 0           | 441     | 0           | 0           | 599       | 248            | 529               | 85                  | 502        | 101            | 352        | 440          |
| <i>B. rupestris</i> SC009                      | 3947    | 10 | 0           | 441     | 658         | 0           | 530       | 248 (1)        | 529               | 85                  | 534        | 101            | 381        | 440 (37)     |
| <i>B. sandersoni</i> SC255                     | 3942    | 10 | 0           | 418     | 639 (4 'N') | 0           | 599       | 248            | 529               | 85                  | 502        | 101            | 381        | 440          |
| <i>B. schrencki</i> SC298                      | 3902    | 10 | 0           | 412     | 658         | 0           | 530       | 248 (6)        | 513               | 85                  | 534        | 101            | 381        | 440 (4)      |
| <i>B. securus</i> SC142                        | 3984    | 10 | 0           | 441     | 658         | 0           | 599       | 248 (1)        | 529               | 85                  | 502        | 101            | 381        | 440          |
| <i>B. semenoviellus</i> SC236                  | 3984    | 10 | 0           | 441     | 658         | 0           | 599       | 248 (32)       | 529               | 85                  | 502        | 101            | 381        | 440          |
| <i>B. handlirschianus shaposhnikovii</i> SC099 | 4574    | 11 | 0           | 441     | 849         | 459         | 539       | 248 (16)       | 529               | 85                  | 502        | 101            | 381        | 440          |
| <i>B. sibiricus</i> SC274                      | 4522    | 11 | 0           | 441     | 709         | 587 (2 'N') | 599       | 248            | 529               | 85                  | 502        | 90             | 381        | 351          |
| <i>B. sichelii</i> SC034                       | 4063    | 11 | 0           | 441     | 658         | 465         | 599       | 248            | 529               | 85                  | 196        | 21             | 381        | 440          |
| <i>B. simillimus</i> SC243                     | 3325    | 9  | 0           | 441     | 0           | 0           | 599       | 248            | 529               | 85                  | 502        | 101            | 380        | 440          |
| <i>B. sitkensis</i> SC144                      | 3326    | 9  | 0           | 441     | 0           | 0           | 599       | 248 (7)        | 529               | 85                  | 502        | 101            | 381        | 440          |
| <i>B. skorikovi</i> SC159                      | 3326    | 9  | 0           | 441     | 0           | 0           | 599       | 248 (2)        | 529               | 85                  | 502        | 101            | 381        | 440 (37)     |
| <i>B. sonani</i> J6                            | 2918    | 7  | 0           | 0       | 891         | 0           | 530       | 248            | 529               | 85                  | 534        | 101            | 0          | 0            |
| <i>B. pennsylvanicus sonorus</i> SC051         | 3316    | 9  | 0           | 431     | 0           | 0           | 599       | 248 (1)        | 529               | 85                  | 502        | 101            | 381        | 440          |
| <i>B. pennsylvanicus sonorus</i> SC318         | 3686    | 10 | 389 (1 'N') | 441 (1) | 0           | 0           | 599       | 248 (1)        | 529               | 85                  | 473        | 101 (1 'N', 2) | 381        | 440          |
| <i>B. soroensis</i> SC136                      | 3947    | 10 | 0           | 441     | 658         | 0           | 530       | 248            | 529               | 85                  | 534        | 101 (3)        | 381        | 440 (17)     |
| <i>B. sporadicus</i> SC193                     | 4405    | 11 | 0           | 441     | 620 (2 'N') | 459         | 599       | 248 (61)       | 529               | 85                  | 502        | 101            | 381        | 440 (40)     |
| <i>B. steindachneri</i> SC313                  | 3686    | 10 | 389 (1)     | 441     | 0           | 0           | 599       | 248 (1 'N', 1) | 529               | 85                  | 473        | 101 (2)        | 381        | 440          |
| <i>B. subterraneus</i> SC046                   | 4281    | 10 | 0           | 441     | 992         | 0           | 530       | 248 (1)        | 529               | 85                  | 534        | 101            | 381        | 440          |
| <i>B. suckleyi</i> SC091                       | 3326    | 9  | 0           | 441     | 0           | 0           | 599       | 248 (1)        | 529               | 85                  | 502        | 101            | 381        | 440 (37)     |
| <i>B. sulfureus</i> SC064                      | 3220    | 9  | 0           | 441     | 0           | 0           | 594       | 248            | 529               | 84                  | 502        | 90             | 381        | 351          |

| Taxon                                | TL (bp) | N  | 12S | 16S         | COI         | CytB | Argk exon | Argk intron | EF1 $\alpha$ exon | EF1 $\alpha$ intron | Opsin exon | Opsin intron   | PEPCK exon | PEPCK intron |
|--------------------------------------|---------|----|-----|-------------|-------------|------|-----------|-------------|-------------------|---------------------|------------|----------------|------------|--------------|
| <i>B. superbus</i> B02               | 1858    | 5  | 0   | 441         | 0           | 0    | 0         | 0           | 0                 | 0                   | 502        | 101            | 381        | 433          |
| <i>B. supremus</i> SC101             | 3983    | 10 | 0   | 441         | 657         | 0    | 599       | 248 (1)     | 529               | 85                  | 502        | 101            | 381        | 440          |
| <i>B. sushkini</i> s. l. SC143       | 3947    | 10 | 0   | 441         | 658         | 0    | 530       | 248 (1)     | 529               | 85                  | 534        | 101            | 381        | 440          |
| <i>B. sylvarum</i> SC110             | 3948    | 10 | 0   | 441         | 658         | 0    | 599       | 248 (1)     | 529               | 85                  | 502        | 101            | 348        | 437 (44)     |
| <i>B. sylvestris</i> SC020           | 4522    | 11 | 0   | 441 (1 'N') | 658         | 587  | 599       | 248 (2)     | 516               | 85                  | 466        | 101            | 381        | 440 (37)     |
| <i>B. lapponicus sylvicola</i> SC108 | 3949    | 10 | 0   | 441         | 650         | 0    | 599       | 248 (78)    | 529               | 85                  | 502        | 101            | 354        | 440          |
| <i>B. ternarius</i> SC116            | 4481    | 11 | 0   | 441         | 639 (2 'N') | 553  | 530       | 248 (78)    | 529               | 85                  | 534        | 101            | 381        | 440          |
| <i>B. terrestris</i> SC003           | 4478    | 11 | 0   | 441         | 658         | 531  | 530       | 248         | 529               | 85                  | 534        | 101            | 381        | 440 (47)     |
| <i>B. t xanthopus</i> TerX19         | 2788    | 6  | 0   | 0           | 849         | 459  | 0         | 0           | 574               | 85                  | 0          | 0              | 381        | 440 (47)     |
| <i>B. terricola</i> SC205            | 3947    | 10 | 0   | 441         | 658         | 0    | 530       | 248         | 529               | 85                  | 534        | 101            | 381        | 440 (40)     |
| <i>B. tibetanus</i> SC134            | 3326    | 9  | 0   | 441         | 0           | 0    | 599       | 248 (1)     | 529               | 85                  | 502        | 101            | 381        | 440 (37)     |
| <i>B. tichenkoi</i> J1               | 2918    | 7  | 0   | 0           | 891         | 0    | 530       | 248 (1)     | 529               | 85                  | 534        | 101            | 0          | 0            |
| <i>B. transversalis</i> SC314        | 4758    | 12 | 389 | 441         | 658         | 414  | 599       | 248 (6)     | 529               | 85                  | 473        | 101 (3 'N', 2) | 381        | 440          |
| <i>B. tricornis</i> SC148            | 4180    | 10 | 0   | 441 (1)     | 891         | 0    | 530       | 248         | 529               | 85                  | 534        | 101            | 381        | 440          |
| <i>B. albopleuralis</i> SC015        | 4265    | 10 | 0   | 441 (2)     | 980         | 0    | 530       | 248 (1)     | 525               | 85                  | 534        | 101            | 381        | 440          |
| <i>B. trinominatus</i> SC229         | 3326    | 9  | 0   | 441         | 0           | 0    | 599       | 248 (60)    | 529               | 85                  | 502        | 101            | 381        | 440          |
| <i>B. tucumanus</i> SC276            | 3326    | 9  | 0   | 441         | 0           | 0    | 599       | 248 (17)    | 529               | 85                  | 502        | 101            | 381        | 440 (5)      |
| <i>B. tunicatus</i> SC248            | 1099    | 2  | 0   | 441         | 658         | 0    | 0         | 0           | 0                 | 0                   | 0          | 0              | 0          | 0            |
| <i>B. turkestanicus</i> B03          | 1858    | 5  | 0   | 441         | 0           | 0    | 0         | 0           | 0                 | 0                   | 502        | 101            | 381        | 433          |
| <i>B. turneri</i> B09                | 709     | 1  | 0   | 0           | 709         | 0    | 0         | 0           | 0                 | 0                   | 0          | 0              | 0          | 0            |
| <i>B. unicus</i> COI 5P3             | 658     | 1  | 0   | 0           | 658         | 0    | 0         | 0           | 0                 | 0                   | 0          | 0              | 0          | 0            |
| <i>B. ussurensis</i> SC130           | 3866    | 10 | 0   | 412 (2)     | 657         | 0    | 530       | 248 (1)     | 529               | 85                  | 534        | 101            | 350        | 420 (6)      |
| <i>B. vagans</i> SC044               | 3948    | 10 | 0   | 424         | 639         | 0    | 599       | 248         | 529               | 85                  | 502        | 101            | 381        | 440          |
| <i>B. vandykei</i> SC149             | 4226    | 10 | 0   | 441         | 937         | 0    | 530       | 248         | 529               | 85                  | 534        | 101 (1 'N')    | 381        | 440          |
| <i>B. intrudens</i> SC316            | 3297    | 9  | 0   | 441         | 0           | 0    | 599       | 248 (1)     | 529               | 85                  | 473        | 101 (3 'N', 2) | 381        | 440 (37)     |
| <i>B. velox</i> SC094                | 3253    | 9  | 0   | 441         | 0           | 0    | 526       | 248 (1)     | 529               | 85                  | 502        | 101            | 381        | 440 (46)     |

| Taxon                                 | TL (bp) | N  | 12S     | 16S      | COI         | CytB | Argk exon   | Argk intron | EF1 α exon     | EF1 α intron | Opsin exon  | Opsin intron   | PEPCK exon | PEPCK intron |
|---------------------------------------|---------|----|---------|----------|-------------|------|-------------|-------------|----------------|--------------|-------------|----------------|------------|--------------|
| <i>B. vestalis perezii</i> Pere19     | 2788    | 6  | 0       | 0        | 849         | 459  | 0           | 0           | 574            | 85           | 0           | 0              | 381        | 440 (37)     |
| <i>B. vestalis</i> SC169              | 4443    | 11 | 0       | 441      | 658         | 459  | 599         | 248 (1)     | 529            | 85           | 502         | 101            | 381        | 440 (37)     |
| <i>B. veteranus</i> SC187             | 3984    | 10 | 0       | 441      | 658         | 0    | 599         | 248 (6)     | 529            | 85           | 502         | 101            | 381        | 440 (46)     |
| <i>B. vogti</i> SC172                 | 3326    | 9  | 0       | 441      | 0           | 0    | 599         | 248 (17)    | 529            | 85           | 502         | 101            | 381        | 440 (5)      |
| <i>B. volucelloides</i> SC122         | 2468    | 7  | 0       | 441      | 0           | 0    | 530         | 248 (18)    | 529            | 85           | 534         | 101            | 0          | 0            |
| <i>B. vorticosus</i> SC124            | 3159    | 9  | 0       | 441      | 0           | 0    | 533         | 248         | 529            | 84           | 502         | 90             | 381        | 351          |
| <i>B. vosnesenskii</i> SC112          | 4100    | 10 | 0       | 441      | 811         | 0    | 530         | 248 (78)    | 529            | 85           | 534         | 101            | 381        | 440          |
| <i>B. waltoni</i> SC102               | 3946    | 10 | 0       | 441      | 709         | 0    | 539         | 248 (12)    | 529            | 85           | 502         | 101            | 352        | 440          |
| <i>B. weisi</i> SC315                 | 3889    | 11 | 389 (1) | 441      | 203         | 0    | 599         | 248 (89)    | 529            | 85           | 473 (1 'N') | 101 (3 'N', 2) | 381        | 440          |
| <i>B. trifasciatus wilemani</i> SC182 | 441     | 1  | 0       | 441 (2)  | 0           | 0    | 0           | 0           | 0              | 0            | 0           | 0              | 0          | 0            |
| <i>B. wilmattae</i> SC199             | 4137    | 10 | 0       | 441      | 811         | 0    | 599         | 248 (78)    | 529            | 85           | 502         | 101            | 381        | 440          |
| <i>B. wurflenii</i> SC001             | 4802    | 11 | 0       | 441      | 960         | 553  | 530         | 248         | 529            | 85 (1 'N')   | 534         | 101            | 381        | 440          |
| <i>B. zonatus</i> SC063               | 3326    | 9  | 0       | 441      | 0           | 0    | 599         | 248 (17)    | 529            | 85           | 502         | 101            | 381        | 440 (46)     |
| <i>Eufriesea pulchra</i>              | 2414    | 5  | 0       | 0        | 550         | 0    | 530         | 0           | 759            | 85           | 490         | 0              | 0          | 0            |
| <i>Eufriesea surinamensis</i>         | 2875    | 5  | 0       | 0        | 1069        | 0    | 583         | 0           | 636 (3 'N')    | 85           | 502         | 0              | 0          | 0            |
| <i>Euglossa championi</i>             | 3415    | 6  | 0       | 416 (10) | 1050        | 0    | 582         | 0           | 795 (5 'N')    | 85           | 487         | 0              | 0          | 0            |
| <i>Euglossa imperialis</i>            | 3624    | 7  | 0       | 383 (1)  | 871         | 534  | 467         | 0           | 759            | 85           | 525         | 0              | 0          | 0            |
| <i>Eulaema boliviensis</i>            | 3586    | 7  | 0       | 441 (2)  | 1082        | 0    | 599         | 0           | 529            | 85           | 502         | 0              | 348        | 0            |
| <i>Eulaema nigrita</i>                | 3236    | 7  | 0       | 416 (3)  | 641 (4 'N') | 536  | 474 (2 'N') | 0           | 597            | 85           | 487         | 0              | 0          | 0            |
| <i>Geniotrigona thoracica</i>         | 2423    | 6  | 0       | 441 (1)  | 0           | 0    | 556         | 0           | 494 (5 'N')    | 85           | 475         | 0              | 372        | 0            |
| <i>Heterotrigona itama</i>            | 2408    | 6  | 0       | 441 (2)  | 0           | 0    | 539         | 0           | 506            | 85           | 486         | 0              | 351        | 0            |
| <i>Hypotrigona gribodoi</i>           | 2411    | 6  | 0       | 441      | 0           | 0    | 539         | 0           | 542 (1 'N', 3) | 85 (1)       | 443         | 0              | 361        | 0            |
| <i>Liotrigona mahafalya</i>           | 2739    | 6  | 0       | 441      | 665         | 0    | 539         | 0           | 566 (1 'N')    | 85 (1)       | 443 (1 'N') | 0              | 0          | 0            |
| <i>Plebeia frontalis</i>              | 2451    | 6  | 0       | 441      | 0           | 0    | 539         | 0           | 566            | 85 (1)       | 443         | 0              | 377        | 0            |
| <i>Trigona amazonensis</i>            | 2464    | 6  | 0       | 441 (2)  | 0           | 0    | 530         | 0           | 529            | 85 (1)       | 502         | 0              | 377 (3)    | 0            |
