# Supplementary material for: Biogeography and Diversification of Bumblebees (Hymenoptera: Apidae), with Emphasis on Neotropical Species
Source: MDPI journal article supplement (doi:10.3390/d14040238), 2022-03-25
Supplement: s1 [file s1]

**Table S7.** BioGeoBEARS results for each model implemented in the analysis: LnL – log-likelihood values of the run, N – number parameters, d – dispersal rate, e – extinction rate; j – jump dispersal rate, AIC – Akaike Information Criterion and AICc – Corrected Akaike Information Criterion. Best-fitting model in bold. The information of distribution areas used in the analyses followed the available in <http://www.nhm.ac.uk/research-curation/research/projects/bombus>.

| Model                | LnL            | N        | d             | e            | j            | AIC            | AICc           |
|----------------------|----------------|----------|---------------|--------------|--------------|----------------|----------------|
| <b>BAYAREALIKE+J</b> | <b>-619.74</b> | <b>3</b> | <b>0.0016</b> | <b>0.033</b> | <b>0.007</b> | <b>1245.48</b> | <b>1245.59</b> |
| BAYAREALIKE          | -637.31        | 2        | 0.0019        | 0.054        | 0.000        | 1278.62        | 1278.68        |
| DEC+J                | -643.56        | 3        | 0.0036        | 1.00E-12     | 0.012        | 1293.13        | 1293.24        |
| DIVALIKE+J           | -661.44        | 3        | 0.0041        | 1.00E-12     | 0.012        | 1328.88        | 1328.99        |
| DEC                  | -668.36        | 2        | 0.0044        | 5.28E-06     | 0.000        | 1340.71        | 1340.77        |
| DIVALIKE             | -683.08        | 2        | 0.0055        | 1.00E-12     | 0.000        | 1370.16        | 1370.21        |
